# Supplementary material for: Efficient triplet exciton phosphorescence quenching from a rhenium monolayer on silicon
Source: Royal Society of Chemistry journal article supplement (doi:10.1039/d4tc02027h), 2024-01-01
Supplement: d4tc02027h1.zip [file d4tc02027h1.zip]

## Sheet: Fig. 1a
PiB,mN/m	ReC16 Area Per mol
0.37023	184.52
0.38194	184.447
0.37023	184.257
0.38663	183.907
0.37726	183.768
0.38663	183.579
0.36788	183.163
0.37491	182.98
0.38194	182.491
0.38897	182.323
0.38897	181.754
0.37726	181.571
0.37726	181.258
0.37023	181.031
0.37491	180.82
0.37023	180.571
0.38194	180.36
0.37257	179.9
0.37726	179.732
0.37257	179.207
0.38194	179.053
0.36788	178.666
0.3632	178.564
0.38429	178.396
0.36085	177.98
0.3632	177.812
0.36788	177.331
0.3632	177.141
0.3632	176.71
0.3632	176.491
0.37491	176.039
0.36554	175.805
0.37726	175.528
0.37257	175.338
0.37257	175.185
0.37257	174.871
0.35851	174.681
0.37726	174.229
0.37491	174.032
0.38429	173.572
0.3632	173.367
0.3632	172.842
0.35617	172.725
0.37257	172.338
0.3632	172.2
0.3796	171.652
0.39131	171.484
0.39366	171.046
0.38429	170.842
0.37726	170.346
0.37491	170.156
0.3796	169.886
0.36788	169.674
0.37726	169.536
0.37726	169.127
0.37491	169.025
0.37023	168.477
0.35851	168.36
0.38194	167.806
0.37257	167.645
0.37726	167.331
0.38429	167.156
0.3796	166.653
0.3632	166.499
0.396	166.018
0.38194	165.828
0.38194	165.412
0.37726	165.215
0.37257	164.886
0.38194	164.726
0.37257	164.521
0.38194	164.149
0.38429	164.061
0.38429	163.499
0.37257	163.397
0.37726	162.872
0.37726	162.726
0.38194	162.237
0.37726	162.098
0.3796	161.733
0.39366	161.551
0.38663	161.062
0.38194	160.916
0.38194	160.361
0.38663	160.244
0.39366	159.908
0.38663	159.777
0.38194	159.638
0.38663	159.281
0.37726	159.164
0.38663	158.595
0.39131	158.39
0.38663	157.938
0.39131	157.741
0.38663	157.281
0.396	157.091
0.38897	156.814
0.39366	156.617
0.39834	156.42
0.38429	156.149
0.38194	155.952
0.39366	155.478
0.40069	155.31
0.40303	154.865
0.40303	154.682
0.39131	154.171
0.38897	154.04
0.40303	153.646
0.39131	153.544
0.41006	153.026
0.42881	152.901
0.47801	152.354
0.50145	152.179
0.53659	151.719
0.56471	151.529
0.57877	151.252
0.59283	151.048
0.61861	150.843
0.65375	150.566
0.6725	150.383
0.71702	149.938
0.73811	149.741
0.8084	149.15
0.81778	149.099
0.85527	148.69
0.85527	148.551
0.88104	148.42
0.92322	148.048
0.949	147.894
0.9982	147.391
1.02632	147.172
1.07319	146.727
1.09662	146.53
1.14583	146.201
1.15754	146.041
1.17863	145.858
1.23487	145.53
1.2419	145.347
1.2911	144.844
1.31454	144.698
1.39655	144.106
1.41295	143.924
1.45278	143.617
1.49028	143.428
1.51371	143.282
1.54651	142.982
1.5676	142.807
1.63555	142.333
1.6707	142.128
1.71288	141.617
1.75974	141.486
1.81129	141.092
1.83473	140.895
1.85816	140.8
1.90502	140.406
1.9308	140.209
1.98938	139.705
2.0175	139.508
2.09482	139.041
2.12294	138.837
2.19558	138.391
2.2237	138.216
2.26119	137.807
2.28462	137.647
2.36429	137.18
2.37366	137.012
2.48379	136.472
2.49551	136.384
2.58689	135.786
2.6033	135.632
2.66188	135.362
2.69702	135.165
2.76732	134.654
2.81653	134.457
2.88917	133.983
2.93603	133.83
3.01336	133.362
3.03913	133.158
3.09302	132.881
3.10474	132.72
3.1516	132.523
3.21721	132.151
3.22424	132.049
3.33672	131.45
3.36718	131.311
3.45388	130.757
3.47028	130.655
3.54058	130.26
3.57338	130.1
3.62962	129.903
3.66711	129.691
3.69757	129.472
3.80536	129.034
3.84051	128.852
3.94361	128.326
3.97875	128.122
4.05139	127.655
4.09826	127.45
4.17324	127.078
4.2201	126.903
4.30915	126.356
4.34898	126.166
4.45442	125.699
4.48723	125.502
4.5997	125.056
4.63719	124.837
4.69577	124.56
4.72623	124.399
4.83637	123.903
4.87151	123.691
5.01211	123.151
5.03319	122.998
5.13864	122.48
5.17144	122.341
5.26283	121.991
5.31906	121.786
5.41045	121.334
5.46434	121.144
5.56041	120.728
5.60259	120.509
5.72444	120.049
5.76662	119.874
5.86503	119.56
5.86034	119.429
5.91189	119.203
6.00094	118.874
6.0314	118.706
6.17433	118.108
6.19776	117.998
6.33367	117.451
6.34539	117.341
6.49301	116.772
6.53987	116.655
6.57268	116.342
6.63594	116.159
6.75779	115.685
6.78591	115.466
6.91478	115.035
6.93119	114.853
7.03663	114.48
7.06241	114.393
7.09755	114.188
7.17722	113.809
7.19831	113.721
7.30375	113.13
7.34593	112.991
7.44435	112.488
7.46778	112.32
7.57322	111.802
7.60837	111.597
7.65992	111.342
7.71616	111.145
7.79348	110.663
7.82863	110.459
7.91533	109.977
7.94111	109.831
8.04889	109.313
8.07467	109.174
8.14262	108.831
8.1848	108.627
8.19651	108.539
8.25275	108.181
8.29961	107.955
8.38397	107.466
8.43083	107.327
8.5105	106.817
8.53862	106.641
8.59486	106.4
8.63001	106.211
8.67218	106.006
8.71202	105.685
8.74717	105.546
8.83621	104.992
8.8737	104.831
8.98617	104.291
9.00492	104.138
9.10333	103.634
9.13145	103.474
9.22518	103.109
9.26267	102.897
9.37749	102.437
9.41966	102.226
9.51339	101.729
9.56963	101.561
9.64695	101.072
9.69851	100.861
9.7688	100.591
9.80629	100.43
9.84378	100.248
9.9422	99.9118
9.94923	99.7658
10.0968	99.1746
10.125	99.0651
10.2726	98.4812
10.2749	98.3206
10.3593	97.9776
10.4202	97.7805
10.4624	97.62
10.5561	97.2769
10.6077	97.1236
10.7248	96.6346
10.7693	96.4302
10.9099	95.985
10.9756	95.7806
11.0716	95.4011
11.0904	95.2551
11.1396	95.131
11.2591	94.715
11.3012	94.569
11.4629	93.9997
11.5168	93.8975
11.6434	93.3428
11.6973	93.1458
11.88	92.7005
11.9363	92.5108
12.0183	92.2407
12.0722	92.0436
12.2292	91.5692
12.2854	91.4232
12.4635	90.8904
12.5361	90.7152
12.6791	90.2043
12.747	90.0145
12.9017	89.6496
12.9368	89.5547
13.0165	89.3503
13.1711	88.9635
13.1899	88.8759
13.4148	88.2993
13.4617	88.1752
13.6749	87.5913
13.7522	87.4162
13.9327	86.9271
13.9913	86.7738
14.1365	86.46
14.2115	86.2775
14.3029	86.1097
14.4341	85.8031
14.5349	85.6133
14.7012	85.1608
14.8137	84.9637
15.0597	84.3798
15.1207	84.263
15.3456	83.8835
15.4112	83.7521
15.4815	83.6207
15.6221	83.2631
15.7346	83.0733
15.9877	82.5989
16.1048	82.3872
16.3063	81.8763
16.4282	81.7157
16.6109	81.3289
16.7094	81.1683
17.0163	80.5844
17.0983	80.4676
17.3725	79.9713
17.4639	79.8399
17.7849	79.2852
17.9231	79.0663
18.0731	78.8181
18.1668	78.5991
18.4691	78.0955
18.605	77.9276
18.9401	77.4167
19.0596	77.2415
19.3619	76.7306
19.4697	76.5919
19.7438	76.227
19.8774	76.0299
20.264	75.5336
20.3694	75.3438
20.7069	74.8767
20.8451	74.6723
21.2364	74.1906
21.3325	74.0301
21.6301	73.6724
21.7097	73.5775
22.162	73.0009
22.2955	72.8476
22.7314	72.3221
22.8931	72.1178
23.0665	71.8404
23.2399	71.6871
23.4109	71.4681
23.6874	71.1762
23.8585	71.001
24.2123	70.5704
24.4115	70.3806
24.9059	69.8405
25.0347	69.6726
25.4495	69.1836
25.6018	69.023
25.9556	68.6654
26.1665	68.4318
26.668	67.9574
26.7617	67.7384
27.2444	67.2859
27.4342	67.0815
27.9145	66.5925
28.1184	66.41
28.4722	66.1181
28.5378	65.9575
29.0955	65.4466
29.2478	65.2714
29.8758	64.6729
29.925	64.5999
30.4546	63.9941
30.553	63.8919
30.963	63.5051
31.1739	63.2934
31.3262	63.184
31.6051	62.8482
31.7878	62.6876
32.2916	62.2205
32.4838	62.0161
32.9524	61.5636
33.1211	61.3519
33.5312	60.9724
33.6343	60.8921
33.8358	60.695
34.2787	60.3082
34.3396	60.1622
34.9184	59.6221
35.0613	59.4323
35.619	58.9433
35.7783	58.8046
36.2353	58.2061
36.411	58.031
36.7414	57.7171
36.9406	57.52
37.4467	57.0529
37.5662	56.8777
38.0137	56.396
38.1918	56.1917
38.6323	55.7026
38.7987	55.5202
39.0963	55.126
39.19	54.9946
39.3212	54.8633
39.5462	54.4618
39.6118	54.294
40.0055	53.7757
40.1039	53.6225
40.364	53.075
40.4132	52.8488
40.4624	52.5787
40.4975	52.4035
40.5491	52.2211
40.5842	51.878
40.6311	51.6883
40.6944	51.17
40.7248	51.0241
40.7787	50.4839
40.8045	50.3672
40.849	49.9511
40.8654	49.7687
40.8771	49.6665
40.8959	49.3015
40.938	49.1118
40.9873	48.6446
41.0107	48.4257
41.0505	47.9804
41.0927	47.7542
41.1302	47.4476
41.1606	47.3527
41.1606	47.1411
41.2075	46.7469
41.2192	46.6448
41.2872	46.0389
41.3223	45.9149
41.3739	45.3237
41.3786	45.1339
41.3973	44.8273
41.4184	44.6668
41.4465	44.4989
41.4582	44.1996
41.4746	43.988
41.5356	43.4552
41.5379	43.3165
41.5777	42.8128
41.6035	42.6742
41.6176	42.3092
41.6316	42.1341
41.6457	41.9881
41.6738	41.6596
41.6785	41.4772
41.6902	41.0027
41.7066	40.7765
41.716	40.2437
41.709	40.0539
41.6972	39.6816
41.6972	39.5649
41.7019	39.3751
41.6949	38.9956
41.6879	38.9007
41.7019	38.3022
41.6926	38.1927
41.6949	37.6818
41.6832	37.5212
41.6855	37.0395
41.7019	36.8789
41.7019	36.5796
41.6949	36.4044
41.6996	35.8716
41.716	35.6819
41.7254	35.2074
41.7371	34.9885
41.7441	34.5433
41.7488	34.3389
41.7511	33.9374
41.7488	33.7988
41.8683	33.2732
41.7863	33.1857
41.8167	32.6091
41.791	32.4193
41.8167	31.9448
41.8355	31.7405
41.8378	31.4631
41.8589	31.288
41.8519	31.0836
41.8613	30.7989
41.8659	30.6092
41.887	30.142
41.9105	29.9961
41.9128	29.4997
41.9292	29.3319
41.7324	29.0107
41.5918	29.0107
41.4231	29.0253
41.3668	29.0326
41.2801	29.0253
41.2333	29.0107
41.1208	29.0399
41.0904	29.0253
41.0271	29.0253
41.013	29.0253
40.9404	29.0326
40.9193	29.0107
40.8841	29.018
40.8748	29.0253
40.8678	29.0399
40.8209	29.0326
40.8139	29.018
40.7811	29.0253
40.7647	29.0253

## Sheet: Fig. 1c.
lambda ReC16 Sln	Norm ABS ReC16 Sln	lambda EMS ReC16 Sln	Norm EMS ReC16 Sln	lambda EMS ReC16 LB	Norm EMS ReC16 LB
699.989	0.02526	332.03	0.01227	450	0.04706
699.486	0.02559	332.96	0.01209	451.06	0.05286
698.983	0.0252	334.06	0.01198	451.96	0.05468
698.516	0.0254	335	0.01254	453.03	0.06316
698.013	0.0257	335.93	0.01445	453.93	0.07434
697.51	0.0257	337.03	0.01624	455	0.07549
697.007	0.02592	337.96	0.01612	456.06	0.08508
696.504	0.02645	339.06	0.0156	456.96	0.09024
696	0.02488	340	0.01605	458.03	0.0999
695.497	0.02585	341.07	0.01668	458.93	0.11154
694.993	0.02586	342	0.01776	460	0.10557
694.49	0.02563	343.07	0.01861	461.06	0.11422
693.986	0.02557	344	0.01861	461.96	0.12782
693.482	0.02558	345.07	0.01883	463.03	0.13568
693.014	0.02536	346	0.01941	463.93	0.14596
692.511	0.026	347.07	0.02018	465	0.15483
692.007	0.02616	348	0.02198	466.06	0.174
691.503	0.02676	349.07	0.02406	466.96	0.18225
690.998	0.02569	350	0.02537	468.03	0.19699
690.494	0.0261	351.06	0.02586	468.93	0.20522
689.99	0.02604	351.96	0.02763	470	0.21619
689.485	0.02547	353.03	0.02985	471.04	0.23777
689.017	0.0255	353.93	0.03079	471.94	0.24345
688.512	0.02573	355	0.03156	472.98	0.25935
688.008	0.02637	356.06	0.0321	474.02	0.28229
687.503	0.02635	356.96	0.0322	475.07	0.29947
686.998	0.02718	358.03	0.0299	475.97	0.31102
686.493	0.02624	358.93	0.02914	477.01	0.33527
685.988	0.02579	360	0.02943	478.05	0.35128
685.483	0.02627	361.07	0.0295	478.95	0.36625
685.014	0.0259	362	0.02956	480	0.38501
684.509	0.02642	363.07	0.03123	481.06	0.40228
684.004	0.02658	364	0.03355	481.96	0.42176
683.499	0.02656	365.07	0.03377	483.03	0.44482
682.993	0.02639	366	0.03437	483.93	0.45669
682.488	0.02693	367.07	0.03463	485	0.48215
681.982	0.02694	368	0.03492	486.06	0.50256
681.512	0.02625	369.07	0.0334	486.96	0.51923
681.007	0.02724	370	0.03394	488.03	0.53393
680.501	0.02745	371.07	0.03453	488.93	0.55044
679.995	0.02728	372	0.03613	490	0.56776
679.489	0.02699	373.07	0.03521	491.04	0.58937
678.983	0.02683	374	0.03517	491.94	0.61421
678.513	0.02813	375.07	0.03439	492.98	0.61708
678.007	0.02738	376	0.03569	494.02	0.64047
677.5	0.02768	377.07	0.03522	495.07	0.65205
676.994	0.02736	378	0.036	495.97	0.6763
676.487	0.02706	379.07	0.03477	497.01	0.69111
676.017	0.02732	380	0.03415	498.05	0.7096
675.51	0.02792	381.07	0.03313	498.95	0.71752
675.004	0.02825	382	0.03351	500	0.73558
674.497	0.02844	383.07	0.03391	501.04	0.75593
673.99	0.02798	384	0.03447	501.94	0.76235
673.483	0.02803	385.07	0.03522	502.98	0.77565
673.012	0.02865	386	0.03377	504.02	0.78694
672.505	0.02858	387.07	0.03125	505.07	0.79473
671.998	0.02881	388	0.03022	505.97	0.81436
671.491	0.02803	389.07	0.03102	507.01	0.83036
670.984	0.02738	390	0.03042	508.05	0.85997
670.512	0.02842	391.06	0.02869	508.95	0.86083
670.005	0.02863	391.96	0.028	510	0.86659
669.497	0.02882	393.03	0.02765	511.04	0.87631
668.99	0.02814	393.93	0.02667	511.94	0.88846
668.482	0.02822	395	0.02628	512.98	0.90395
668.01	0.02854	396.06	0.02557	514.02	0.91193
667.503	0.02883	396.96	0.02431	515.07	0.93013
666.995	0.02826	398.03	0.02413	515.97	0.92868
666.487	0.02881	398.93	0.02495	517.01	0.93943
666.015	0.02905	400	0.02397	518.05	0.94362
665.507	0.02897	401.07	0.02288	518.95	0.94296
664.998	0.02839	402	0.02257	520	0.95994
664.49	0.02776	403.07	0.02299	521.04	0.9612
664.018	0.02829	404	0.02281	521.94	0.97016
663.509	0.02867	405.07	0.02266	522.98	0.97622
663.001	0.02834	406	0.02133	524.02	0.96793
662.492	0.02837	407.07	0.01981	525.07	0.97613
661.983	0.02957	408	0.01927	525.97	0.98166
661.511	0.02929	409.07	0.01913	527.01	0.97999
661.002	0.02907	410	0.01874	528.05	0.98946
660.493	0.02952	411.06	0.01766	528.95	0.98237
659.984	0.02837	411.96	0.01744	530	0.98584
659.511	0.02922	413.03	0.01831	531.02	0.99949
659.002	0.02934	413.93	0.01829	532.05	0.99566
658.493	0.02923	415	0.01746	532.94	0.99386
657.984	0.02866	416.06	0.01587	533.97	1
657.511	0.02846	416.96	0.01588	535	0.99759
657.001	0.02868	418.03	0.01509	536.02	0.99923
656.491	0.02938	418.93	0.01503	537.05	0.99354
655.982	0.02857	420	0.01431	537.94	0.98903
655.508	0.02862	421.06	0.01483	538.97	0.98252
654.999	0.02926	421.96	0.01479	540	0.96961
654.489	0.02998	423.03	0.0141	541.04	0.95054
654.015	0.02965	423.93	0.01283	541.94	0.96029
653.505	0.02955	425	0.01201	542.98	0.95943
652.995	0.02946	426.06	0.01173	544.02	0.9513
652.485	0.02981	426.96	0.01155	545.07	0.93289
652.011	0.02933	428.03	0.01211	545.97	0.92262
651.501	0.02934	428.93	0.01155	547.01	0.92017
650.99	0.02989	430	0.01066	548.05	0.90207
650.517	0.02967	431.06	0.01026	548.95	0.89572
650.006	0.02954	431.96	0.01099	550	0.88374
649.495	0.02999	433.03	0.01045	551.02	0.86226
648.985	0.0303	433.93	0.00998	552.05	0.86573
648.51	0.03037	435	0.01019	552.94	0.84691
648	0.02954	436.06	0.01013	553.97	0.84936
647.489	0.03017	436.96	0.00963	555	0.84226
647.014	0.03037	438.03	0.00943	556.02	0.81975
646.503	0.03048	438.93	0.00944	557.05	0.80519
645.992	0.02977	440	0.00905	557.94	0.80201
645.517	0.03011	441.06	0.00864	558.97	0.80289
645.006	0.03049	441.96	0.00848	560	0.79104
644.495	0.02998	443.03	0.00817	561.02	0.79624
643.983	0.02943	443.93	0.00853	562.05	0.77434
643.508	0.03033	445	0.00928	562.94	0.75735
642.996	0.0314	446.06	0.00933	563.97	0.74089
642.485	0.03098	446.96	0.00919	565	0.7413
642.01	0.03069	448.03	0.00921	566.02	0.72866
641.498	0.03089	448.93	0.0091	567.05	0.72755
640.986	0.02976	450	0.00885	567.94	0.71846
640.51	0.03058	451.06	0.0096	568.97	0.7022
639.998	0.03097	451.96	0.0104	570	0.66628
639.486	0.03075	453.03	0.0112	571.02	0.66913
639.011	0.03093	453.93	0.01138	572.05	0.64745
638.499	0.03167	455	0.01215	572.94	0.64189
637.986	0.03166	456.06	0.01278	573.97	0.63817
637.51	0.03048	456.96	0.01506	575	0.62755
636.998	0.03098	458.03	0.01569	576.02	0.62048
636.485	0.03173	458.93	0.01677	577.05	0.60862
636.009	0.03152	460	0.01773	577.94	0.61147
635.497	0.03133	461.06	0.01974	578.97	0.58845
634.984	0.03113	461.96	0.02056	580	0.58371
634.508	0.03134	463.03	0.02373	581.02	0.57575
633.995	0.03191	463.93	0.027	582.05	0.56646
633.482	0.03179	465	0.03019	582.94	0.55868
633.005	0.0321	466.06	0.03172	583.97	0.54977
632.492	0.03158	466.96	0.03544	585	0.53719
632.016	0.03153	468.03	0.03878	586.02	0.52912
631.502	0.03239	468.93	0.04285	587.05	0.51748
630.989	0.03287	470	0.04607	587.94	0.50568
630.512	0.03247	471.04	0.05147	588.97	0.49907
629.999	0.03225	471.94	0.05734	590	0.48284
629.485	0.03248	472.98	0.06352	591.02	0.48068
629.008	0.03322	474.02	0.06931	592.05	0.46759
628.495	0.03232	475.07	0.07705	592.94	0.45977
628.017	0.03254	475.97	0.08569	593.97	0.45179
627.504	0.03273	477.01	0.09203	595	0.44547
626.99	0.03284	478.05	0.09845	596.02	0.43429
626.512	0.0329	478.95	0.10701	597.05	0.4315
625.998	0.0326	480	0.11922	597.94	0.42078
625.484	0.03283	481.06	0.12648	598.97	0.41591
625.007	0.03285	481.96	0.13404	600	0.40231
624.492	0.0327	483.03	0.14254	601.01	0.39715
624.015	0.0333	483.93	0.15726	602.02	0.38978
623.5	0.03302	485	0.16763	603.04	0.38028
622.986	0.03324	486.06	0.17826	604.05	0.37308
622.508	0.03304	486.96	0.19147	605.07	0.36564
621.993	0.03339	488.03	0.20367	605.94	0.36066
621.515	0.03348	488.93	0.21536	606.95	0.35264
621	0.03468	490	0.2295	607.97	0.34763
620.486	0.03383	491.04	0.24827	608.98	0.33014
620.008	0.03376	491.94	0.26004	610	0.33218
619.492	0.03362	492.98	0.27503	611.02	0.3218
619.014	0.03316	494.02	0.29462	612.05	0.31713
618.499	0.03322	495.07	0.31452	612.94	0.30486
617.984	0.033	495.97	0.32401	613.97	0.30656
617.505	0.03326	497.01	0.34032	615	0.29255
616.99	0.0335	498.05	0.35942	616.02	0.29562
616.511	0.03416	498.95	0.38126	617.05	0.28357
615.996	0.0349	500	0.39562	617.94	0.27911
615.517	0.03455	501.04	0.41408	618.97	0.27394
615.002	0.03391	501.94	0.42769	620	0.26569
614.486	0.03361	502.98	0.44498	621.01	0.25887
614.007	0.03362	504.02	0.46464	622.02	0.25654
613.491	0.03419	505.07	0.48269	623.04	0.25752
613.012	0.03401	505.97	0.50117	624.05	0.24218
612.496	0.03376	507.01	0.51989	625.07	0.23247
612.017	0.03373	508.05	0.53828	625.94	0.23191
611.501	0.03392	508.95	0.55488	626.95	0.23123
610.984	0.03348	510	0.57803	627.97	0.22308
610.505	0.03417	511.04	0.59685	628.98	0.22008
609.989	0.03536	511.94	0.61271	630	0.20948
609.509	0.0343	512.98	0.63414	631.01	0.2075
608.993	0.03409	514.02	0.65485	632.02	0.20411
608.513	0.0344	515.07	0.66915	633.04	0.19524
607.996	0.0346	515.97	0.68495	634.05	0.19229
607.517	0.03529	517.01	0.70707	635.07	0.18866
607	0.03505	518.05	0.72056	635.94	0.18571
606.483	0.03484	518.95	0.73022	636.95	0.17885
606.003	0.03424	520	0.74485	637.97	0.17337
605.486	0.03531	521.04	0.76798	638.98	0.16713
605.006	0.03527	521.94	0.78331	640	0.16468
604.489	0.03532	522.98	0.7981	641	0.16321
604.009	0.0351	524.02	0.81148	642	0.15828
603.491	0.03534	525.07	0.82444	643	0.14984
603.011	0.03561	525.97	0.83449	644	0.14858
602.494	0.0352	527.01	0.85521	645	0.14336
602.013	0.03468	528.05	0.87472	646	0.14009
601.496	0.03532	528.95	0.88521	647	0.13698
601.015	0.03512	530	0.89877	648	0.13249
600.497	0.03567	531.02	0.91649	649	0.12853
600.017	0.03541	532.05	0.92585	650	0.12869
599.499	0.03536	532.94	0.92946	651.01	0.12326
599.018	0.03568	533.97	0.93585	652.02	0.12036
598.5	0.03508	535	0.94805	653.04	0.11417
597.982	0.03487	536.02	0.95604	654.05	0.11221
597.501	0.03551	537.05	0.95805	655.07	0.11099
596.983	0.03577	537.94	0.95334	655.94	0.10604
596.502	0.03581	538.97	0.96135	656.95	0.1043
595.983	0.03601	540	0.9698	657.97	0.09676
595.502	0.03547	541.04	0.97858	658.98	0.10018
594.984	0.03506	541.94	0.98439	660	0.09566
594.502	0.03577	542.98	0.99261	661	0.09606
593.984	0.03556	544.02	0.99527	662	0.08963
593.502	0.03598	545.07	0.98838	663	0.0883
592.983	0.03596	545.97	0.99156	664	0.08672
592.502	0.0366	547.01	0.99276	665	0.08248
591.983	0.03676	548.05	0.99488	666	0.08263
591.501	0.03623	548.95	0.98175	667	0.08045
590.982	0.03625	550	0.99096	668	0.07844
590.5	0.03638	551.02	0.99648	669	0.07602
590.018	0.03655	552.05	1	670	0.07661
589.499	0.03651	552.94	0.99247	671	0.07141
589.017	0.03642	553.97	0.98725	672	0.06817
588.498	0.03698	555	0.98445	673	0.06636
588.015	0.03702	556.02	0.99095	674	0.06809
587.496	0.03694	557.05	0.99355	675	0.06841
587.014	0.03657	557.94	0.97856	676	0.06397
586.494	0.03686	558.97	0.97124	677	0.0617
586.012	0.03667	560	0.97054	678	0.06105
585.492	0.03721	561.02	0.96751	679	0.05883
585.009	0.03681	562.05	0.95595	680	0.06084
584.49	0.0372	562.94	0.94923	681	0.05852
584.007	0.03743	563.97	0.95032	682	0.05791
583.487	0.03732	565	0.95276	683	0.05556
583.004	0.03742	566.02	0.95383	684	0.05243
582.484	0.03731	567.05	0.93519	685	0.05472
582.001	0.03782	567.94	0.92473	686	0.05037
581.518	0.03782	568.97	0.91395	687	0.05113
580.998	0.03862	570	0.89552	688	0.04816
580.514	0.03728	571.02	0.87225	689	0.04738
579.994	0.03778	572.05	0.86581	690	0.04733
579.511	0.03781	572.94	0.86374	691	0.04606
578.99	0.03818	573.97	0.85098	692	0.04635
578.507	0.03832	575	0.84473	693	0.04317
577.986	0.03792	576.02	0.84528	694	0.04381
577.503	0.03786	577.05	0.8465	695	0.04077
576.982	0.03859	577.94	0.84096	696	0.04194
576.498	0.03803	578.97	0.83463	697	0.04612
576.014	0.03837	580	0.81967	698	0.04605
575.493	0.0399	581.02	0.80869	699	0.04539
575.01	0.0397	582.05	0.79951	700	0.04289
574.488	0.0386	582.94	0.79768	700.98	0.04072
574.004	0.03937	583.97	0.79279	701.97	0.04458
573.483	0.03918	585	0.78211	702.95	0.0395
572.999	0.03897	586.02	0.76672	703.94	0.03795
572.515	0.039	587.05	0.75126	705.07	0.03505
571.993	0.03904	587.94	0.74655	706.05	0.03151
571.509	0.03936	588.97	0.74003	707.04	0.03604
570.988	0.03901	590	0.72921	708.02	0.03274
570.503	0.03969	591.02	0.71496	709.01	0.0351
569.982	0.04028	592.05	0.70642	710	0.03391
569.497	0.03938	592.94	0.70225	710.98	0.03364
569.012	0.03879	593.97	0.69841	711.97	0.03241
568.491	0.03918	595	0.68693	712.95	0.03319
568.006	0.04006	596.02	0.67454	713.94	0.03213
567.484	0.04004	597.05	0.66288	715.07	0.03347
566.999	0.03988	597.94	0.65313	716.05	0.03182
566.514	0.03909	598.97	0.63959	717.04	0.02681
565.992	0.03835	600	0.62865	718.02	0.03122
565.507	0.03917	601.01	0.62101	719.01	0.03077
564.985	0.04004	602.02	0.61919	720	0.02731
564.5	0.03994	603.04	0.61087	720.98	0.02929
564.014	0.04008	604.05	0.59859	721.97	0.02665
563.492	0.0407	605.07	0.58657	722.95	0.02559
563.007	0.04057	605.94	0.58103	723.94	0.02679
562.484	0.04062	606.95	0.57037	725.07	0.02526
561.999	0.04115	607.97	0.55959	726.05	0.0252
561.513	0.04122	608.98	0.54517	727.04	0.02294
560.99	0.04129	610	0.53434	728.02	0.02375
560.505	0.04158	611.02	0.52778	729.01	0.01956
559.982	0.04138	612.05	0.52192	730	0.02034
559.496	0.04172	612.94	0.51227	730.98	0.02266
559.01	0.04124	613.97	0.4994	731.97	0.01887
558.487	0.04154	615	0.48747	732.95	0.01871
558.001	0.04159	616.02	0.48183	733.94	0.01804
557.515	0.04177	617.05	0.47884	735.07	0.01389
556.992	0.04162	617.94	0.46839	736.05	0.01584
556.506	0.0425	618.97	0.45528	737.04	0.02201
555.982	0.04238	620	0.44167	738.02	0.01743
555.496	0.04149	621.01	0.43044	739.01	0.0178
555.01	0.04242	622.02	0.42146	740	0.01845
554.486	0.04224	623.04	0.41721	740.97	0.01723
554	0.04263	624.05	0.40943	741.94	0.01862
553.514	0.04253	625.07	0.40089	743.05	0.01378
552.99	0.04198	625.94	0.39265	744.02	0.01507
552.503	0.04255	626.95	0.38364	745	0.01848
552.017	0.04238	627.97	0.3793	745.97	0.01445
551.493	0.04326	628.98	0.37187	746.94	0.01399
551.006	0.04334	630	0.35986	748.05	0.01549
550.482	0.04286	631.01	0.34759	749.02	0.01506
549.995	0.04281	632.02	0.34182	750	0.01415
549.508	0.04271	633.04	0.33645	750.97	0.01394
548.984	0.04303	634.05	0.33081	751.94	0.011
548.497	0.04316	635.07	0.32454	753.05	0.00971
548.01	0.04296	635.94	0.31664	754.02	0.01211
547.485	0.04324	636.95	0.30856	755	0.00981
546.998	0.04366	637.97	0.30023	755.97	0.00979
546.511	0.04382	638.98	0.29586	756.94	0.01076
545.986	0.04388	640	0.28848	758.05	0.00986
545.499	0.04347	641	0.27887	759.02	0.01037
545.012	0.04324	642	0.27154	760	0.01095
544.487	0.04267	643	0.26825	760.97	0.0091
543.999	0.04385	644	0.2605	761.94	0.00763
543.512	0.0441	645	0.24865	763.05	0.00603
542.987	0.04423	646	0.24048	764.02	0.00913
542.499	0.04403	647	0.23586	765	0.01177
542.011	0.04469	648	0.23132	765.97	0.00942
541.486	0.0443	649	0.22798	766.94	0.00977
540.998	0.04479	650	0.22166	768.05	0.00852
540.51	0.04577	651.01	0.21448	769.02	0.00954
539.985	0.04413	652.02	0.20873	770	0.00667
539.497	0.04526	653.04	0.20679	770.95	0.00719
539.009	0.04524	654.05	0.20222	772.05	0.00659
538.483	0.04428	655.07	0.19393	773.01	0.00391
537.995	0.04501	655.94	0.18671	773.97	0.00592
537.507	0.0454	656.95	0.18453	775.06	0.00684
537.018	0.04557	657.97	0.18082	776.02	0.00543
536.492	0.04569	658.98	0.17462	776.98	0.00893
536.004	0.04634	660	0.17096	777.94	0.00504
535.516	0.04584	661	0.1698	779.04	0.00667
534.99	0.04668	662	0.16436	780	0.00573
534.501	0.04718	663	0.15985	780.95	0.00747
534.013	0.0474	664	0.15542	782.05	0.00554
533.486	0.04725	665	0.1505	783.01	0.00606
532.997	0.04724	666	0.14475	783.97	0.00708
532.509	0.04774	667	0.14067	785.06	0.0047
531.982	0.04827	668	0.13703	786.02	0.00614
531.493	0.048	669	0.13368	786.98	0.00734
531.005	0.04813	670	0.13236	787.94	0.00591
530.516	0.04935	671	0.12678	789.04	0.0041
529.989	0.04932	672	0.12351	790	0.00386
529.5	0.04994	673	0.12185	790.95	0.00312
529.011	0.04891	674	0.11995	792.05	0.00527
528.484	0.04886	675	0.11558	793.01	0.0019
527.995	0.04893	676	0.11325	793.97	0.00426
527.505	0.04908	677	0.11137	795.06	0.00401
527.016	0.04975	678	0.10581	796.02	0.00431
526.489	0.04999	679	0.10019	796.98	0.00247
525.999	0.04978	680	0.09713	797.94	0.00379
525.51	0.05098	681	0.09807	799.04	0.00259
524.982	0.0499	682	0.0958	800	0.00325
524.493	0.05002	683	0.09188	800.95	0.00445
524.003	0.04977	684	0.0864	802.05	0.00239
523.513	0.04942	685	0.08493	803.01	0.00317
522.986	0.04926	686	0.08384	803.97	0.00614
522.496	0.04951	687	0.08203	805.06	0.00492
522.006	0.04961	688	0.07922	806.02	0.00141
521.516	0.04969	689	0.0773	806.98	0.00329
520.988	0.0498	690	0.07512	807.94	0.00253
520.498	0.04976	691	0.07253	809.04	0.00601
520.008	0.04982	692	0.0701	810	0.00346
519.518	0.04989	693	0.06864	810.94	0.00271
518.99	0.05011	694	0.06844	812.02	0.0012
518.5	0.04998	695	0.06698	812.97	0.00294
518.009	0.05001	696	0.06562	814.05	0.00312
517.481	0.0499	697	0.0634	815	0.00203
516.991	0.05012	698	0.06304	815.94	0.00235
516.5	0.05025			817.02	0.00174
516.01	0.05031			817.97	0.00185
515.481	0.05036			819.05	0.00185
514.991	0.05057			820	0.00306
514.5	0.05041			820.94	-0.000726905
514.009	0.05006			822.02	0.00271
513.518	0.05024			822.97	0.00246
512.99	0.05091			824.05	0.00451
512.499	0.05055			825	0.00357
512.008	0.05056			825.94	0.000741311
511.517	0.05028			827.02	0.0018
510.988	0.0506			827.97	0.00525
510.497	0.05055			829.05	0.00373
510.005	0.04998			830	0.00311
509.514	0.05057			830.94	0.000769437
508.985	0.05099			832.02	0.00201
508.494	0.05071			832.97	-5.83674e-05
508.002	0.05117			834.05	-0.000732675
507.511	0.05128			835	-0.000113209
506.982	0.05095			835.94	0.000565746
506.49	0.05068			837.02	0.00362
505.998	0.05082			837.97	0.000427201
505.507	0.05122			839.05	-0.000437851
505.015	0.05176			840	0.000169815
504.485	0.05172			841.06	9.45113e-05
503.993	0.05115			842	0.0021
503.502	0.0517			843.06	0.00194
503.01	0.05208			844	8.51821e-05
502.518	0.05155			845.06	0.000403226
501.988	0.05119			846	0.000351287
501.496	0.05147			847.06	-6.07211e-05
501.004	0.0521			848	-0.000966141
500.511	0.05253			849.06	-0.00146
499.981	0.05247			850	-0.00154
499.489	0.05278			851.06	0.000500906
498.997	0.05332			852	-0.00041558
498.504	0.053			853.06	0.000580703
498.012	0.05343			854	-0.000218121
497.481	0.05346			855.06	-0.000393921
496.989	0.05319			856	0.000117179
496.496	0.0535			857.06	0.000334092
496.004	0.05436			858	-0.00025223
495.511	0.05493			859.06	0.000312343
495.018	0.05497			860	0.000252285
494.487	0.05347			861.06	0.000761779
493.994	0.05478			862	0.00191
493.502	0.05589			863.06	-0.000658818
493.009	0.05598			864	-0.00168
492.515	0.05544			865.06	0.0013
491.985	0.05581			866	-0.00051809
491.491	0.05568			867.06	0.00132
490.998	0.05623			868	0.000208676
490.505	0.05642			869.06	0.00018356
490.012	0.05674			870	0.00133
489.518	0.05716			871.05	-0.00135
488.987	0.05712			871.97	-0.000839637
488.494	0.05714			873.02	0.000674496
488	0.05681			873.94	-0.000541902
487.507	0.05643			875	-0.00147
487.013	0.05725			876.05	-0.00041244
486.481	0.05789			876.97	-0.00155
485.988	0.05789			878.02	-0.000399383
485.494	0.05838			878.94	0.000295687
485	0.05808			880	-0.000920126
484.507	0.05787			881.05	0.000175159
484.013	0.05774			881.97	-0.000393742
483.519	0.05787			883.02	-0.000627752
482.987	0.05858			883.94	-0.00176
482.493	0.05937			885	-0.000118263
481.999	0.05861			886.05	-0.000322011
481.505	0.05856			886.97	0.000482743
481.01	0.0589			888.02	-0.00123
480.516	0.0585			888.94	-0.0009237
479.984	0.05896			890	0.000819497
479.49	0.05885			891.05	0.00112
478.995	0.05903			891.97	-0.00101
478.501	0.05902			893.02	-0.000218018
478.006	0.05936			893.94	-0.00071135
477.512	0.0595			895	-0.000102187
477.017	0.05926			896.05	-0.000430573
476.485	0.05944			896.97	-0.00134
475.99	0.05985			898.02	-0.000926218
475.495	0.05956			898.94	-0.00141
475	0.05959			900	-0.000823258
474.506	0.06016
474.011	0.06035
473.516	0.06089
472.983	0.06137
472.488	0.06085
471.993	0.06095
471.498	0.06107
471.002	0.06183
470.507	0.06192
470.012	0.0621
469.517	0.06221
468.983	0.06234
468.488	0.06168
467.992	0.06263
467.497	0.06304
467.001	0.0634
466.506	0.06363
466.01	0.06348
465.514	0.064
465.019	0.06423
464.485	0.06467
463.989	0.06493
463.493	0.06514
462.997	0.06537
462.501	0.06547
462.005	0.06557
461.509	0.06585
461.013	0.06632
460.517	0.06646
459.983	0.06686
459.486	0.06751
458.99	0.06751
458.494	0.06763
457.997	0.06794
457.501	0.0681
457.004	0.06835
456.508	0.06947
456.011	0.06834
455.515	0.06705
455.018	0.06871
454.483	0.06954
453.986	0.07044
453.489	0.07007
452.993	0.07017
452.496	0.0705
451.999	0.07056
451.502	0.0713
451.005	0.0715
450.508	0.07176
450.01	0.07216
449.513	0.07285
449.016	0.07318
448.519	0.07326
447.983	0.07366
447.486	0.0739
446.988	0.07389
446.491	0.07448
445.993	0.07477
445.496	0.07535
444.998	0.07591
444.501	0.07576
444.003	0.07581
443.505	0.07673
443.007	0.07688
442.51	0.07744
442.012	0.07786
441.514	0.07785
441.016	0.07842
440.518	0.07886
439.982	0.07943
439.484	0.07982
438.985	0.08072
438.487	0.08059
437.989	0.08071
437.491	0.08145
436.992	0.08199
436.494	0.08255
435.996	0.08277
435.497	0.08292
434.999	0.08361
434.5	0.0838
434.002	0.0851
433.503	0.08543
433.004	0.08613
432.506	0.08759
432.007	0.08694
431.508	0.08626
431.009	0.08784
430.51	0.08852
430.011	0.08878
429.512	0.08962
429.013	0.08981
428.514	0.09031
428.015	0.09055
427.516	0.09146
427.017	0.09237
426.518	0.0927
426.018	0.09355
425.519	0.09366
424.981	0.09402
424.482	0.09502
423.982	0.09585
423.483	0.09621
422.983	0.0973
422.484	0.09784
421.984	0.09903
421.484	0.09931
420.985	0.09921
420.485	0.09975
419.985	0.10034
419.485	0.10121
418.985	0.10218
418.485	0.10374
417.985	0.10309
417.485	0.10335
416.985	0.1048
416.485	0.10522
415.985	0.10638
415.485	0.1068
414.985	0.1077
414.485	0.10871
413.984	0.10968
413.484	0.11028
412.983	0.11121
412.483	0.11189
411.983	0.11292
411.482	0.11329
410.981	0.11432
410.481	0.11539
410.019	0.11636
409.518	0.1172
409.017	0.1183
408.517	0.11899
408.016	0.11987
407.515	0.12127
407.014	0.12272
406.513	0.12351
406.012	0.12466
405.511	0.12504
405.01	0.12645
404.509	0.12774
404.008	0.12918
403.507	0.13008
403.005	0.13099
402.504	0.13197
402.003	0.1333
401.501	0.13448
401	0.13553
400.499	0.13695
399.997	0.13862
399.496	0.13929
398.994	0.14029
398.493	0.14191
397.991	0.14319
397.489	0.14333
396.987	0.14411
396.486	0.1458
395.984	0.14694
395.482	0.14729
395.019	0.14907
394.517	0.14893
394.015	0.1513
393.513	0.15233
393.011	0.15318
392.509	0.15493
392.007	0.15497
391.505	0.15579
391.002	0.1564
390.5	0.15703
389.998	0.15806
389.496	0.15954
388.993	0.16064
388.491	0.16067
387.989	0.16175
387.486	0.16307
386.984	0.16398
386.481	0.16469
386.017	0.16555
385.514	0.16678
385.012	0.16786
384.509	0.16837
384.006	0.16872
383.504	0.16953
383.001	0.17054
382.498	0.17192
381.995	0.17246
381.492	0.17344
380.989	0.17495
380.486	0.17592
379.983	0.17665
379.519	0.17737
379.016	0.17807
378.512	0.17972
378.009	0.1812
377.506	0.18266
377.003	0.18438
376.499	0.18522
375.996	0.18551
375.493	0.18723
374.989	0.18906
374.486	0.1902
373.982	0.19108
373.517	0.19255
373.014	0.19362
372.51	0.19458
372.007	0.19547
371.503	0.19686
370.999	0.19819
370.495	0.19945
369.992	0.20106
369.488	0.20188
368.984	0.20251
368.519	0.20317
368.015	0.20517
367.511	0.20624
367.007	0.20639
366.503	0.20794
365.999	0.20894
365.494	0.20873
364.99	0.21024
364.486	0.21161
363.982	0.21184
363.516	0.21238
363.012	0.2141
362.508	0.21494
362.003	0.21587
361.499	0.21713
360.994	0.21638
360.49	0.2165
359.985	0.21663
359.481	0.21747
359.015	0.21859
358.51	0.2188
358.006	0.21983
357.501	0.22077
356.996	0.22068
356.491	0.22141
355.986	0.22224
355.482	0.22299
355.015	0.22365
354.511	0.22411
354.006	0.22411
353.501	0.22435
352.996	0.22496
352.49	0.22518
351.985	0.2255
351.519	0.22586
351.014	0.22623
350.509	0.2261
350.003	0.2261
349.498	0.22648
348.993	0.22748
348.487	0.22759
347.982	0.2284
347.515	0.22866
347.01	0.22906
346.504	0.22968
345.999	0.23007
345.493	0.23007
344.988	0.2305
344.482	0.23073
344.015	0.23055
343.51	0.2311
343.004	0.23172
342.498	0.2324
341.992	0.2326
341.486	0.23316
341.019	0.23432
340.514	0.23419
340.008	0.23553
339.502	0.2363
338.996	0.2372
338.49	0.23817
337.983	0.2392
337.516	0.23983
337.01	0.23997
336.504	0.24115
335.998	0.24233
335.491	0.24409
334.985	0.24575
334.518	0.24683
334.011	0.24873
333.505	0.25062
332.999	0.25361
332.492	0.25541
331.986	0.25768
331.518	0.26195
331.012	0.26604
330.505	0.27154
329.998	0.27758
329.492	0.28511
328.985	0.29465
328.517	0.30505
328.01	0.31872
327.504	0.33154
326.997	0.35005
326.49	0.37376
325.983	0.39683
325.515	0.41954
325.008	0.43834
324.501	0.45927
323.994	0.48032
323.487	0.49364
323.019	0.50191
322.512	0.50448
322.005	0.50157
321.498	0.49251
320.99	0.48556
320.483	0.47775
320.015	0.47013
319.508	0.46385
319	0.4593
318.493	0.45652
317.985	0.45839
317.517	0.46094
317.01	0.46549
316.502	0.47093
315.995	0.47641
315.487	0.48303
315.018	0.48924
314.511	0.49603
314.003	0.50364
313.495	0.50933
312.988	0.51463
312.519	0.51898
312.011	0.5223
311.503	0.52575
310.996	0.52825
310.488	0.5316
310.019	0.53405
309.511	0.53755
309.003	0.54114
308.495	0.5441
307.987	0.54586
307.518	0.54779
307.01	0.55012
306.502	0.55205
305.994	0.55369
305.485	0.55523
305.016	0.55661
304.508	0.55849
304	0.5608
303.491	0.56329
302.983	0.56696
302.514	0.57026
302.005	0.57454
301.497	0.57819
300.989	0.58249
300.519	0.58769
300.011	0.59302
299.502	0.59784
298.994	0.60288
298.485	0.60765
298.015	0.61182
297.507	0.61548
296.998	0.61884
296.489	0.6224
295.981	0.62548
295.511	0.6287
295.002	0.63207
294.493	0.63537
293.984	0.63798
293.515	0.64123
293.006	0.64492
292.497	0.64783
291.988	0.65067
291.518	0.65497
291.009	0.65911
290.5	0.66289
289.991	0.66554
289.481	0.66861
289.011	0.67212
288.502	0.67542
287.993	0.67882
287.484	0.68325
287.014	0.68721
286.504	0.69112
285.995	0.69413
285.486	0.69737
285.015	0.70053
284.506	0.70408
283.997	0.70765
283.487	0.71056
283.017	0.71436
282.507	0.71893
281.998	0.72307
281.488	0.72736
281.018	0.73041
280.508	0.73525
279.998	0.73975
279.489	0.74341
279.018	0.74763
278.508	0.75236
277.999	0.7581
277.489	0.76407
277.018	0.7696
276.508	0.77632
275.998	0.78267
275.488	0.79001
275.018	0.79656
274.508	0.80339
273.998	0.81353
273.488	0.82352
273.017	0.83532
272.507	0.84665
271.997	0.85857
271.486	0.87405
271.016	0.88439
270.505	0.89685
269.995	0.90595
269.485	0.91173
269.014	0.91678
268.503	0.92077
267.993	0.92469
267.483	0.92911
267.012	0.93321
266.501	0.93828
265.991	0.94152
265.52	0.94621
265.009	0.95207
264.499	0.95783
263.988	0.96597
263.517	0.97165
263.006	0.97817
262.496	0.98148
261.985	0.9822
261.513	0.98331
261.003	0.98367
260.492	0.98418
259.981	0.98493
259.51	0.98174
258.999	0.98082
258.488	0.97727
258.017	0.9787
257.506	0.98086
256.995	0.9839
256.484	0.98737
256.012	0.98679
255.501	0.98817
254.99	0.98946
254.519	0.98754
254.007	0.99173
253.496	0.99006
252.985	0.99038
252.513	0.99114
252.002	0.99593
251.491	1
251.019	0.99617
250.508	0.99375
249.997	0.99508

## Sheet: Fig. 2
Wavelegth	ReC16 on Si with 6L SA, d~15 nm	ReC16 on Si with 4L SA, d~11 nm	ReC16 on Si with 2L SA, d~6.4 nm	ReC16 on Si with 0L SA, d~2 nm	blank Si	ReC16 on glass	ReC16 on Si with 6L SA, d~17 nm norm	ReC16 on Si with 4L SA, d~12 nm norm	ReC16 on Si with 2L SA, d~7 nm norm	ReC16 on glass norm
450	585	450	415	356	371	876	0.31776	0.28662	0.45256	0.11595
451	646	462	410	380	393	923	0.3509	0.29427	0.44711	0.12217
452	622	421	454	365	393	987	0.33786	0.26815	0.49509	0.13064
452	622	421	454	365	393	987	0.33786	0.26815	0.49509	0.13064
453	631	400	400	333	372	1052	0.34275	0.25478	0.43621	0.13925
454	630	434	398	356	360	1167	0.34221	0.27643	0.43402	0.15447
455	681	444	409	368	372	1208	0.36991	0.2828	0.44602	0.15989
455	681	444	409	368	372	1208	0.36991	0.2828	0.44602	0.15989
456	716	486	410	332	343	1327	0.38892	0.30955	0.44711	0.17565
457	645	454	426	378	360	1424	0.35035	0.28917	0.46456	0.18848
457	645	454	426	378	360	1424	0.35035	0.28917	0.46456	0.18848
458	690	431	394	370	382	1541	0.3748	0.27452	0.42966	0.20397
459	742	479	441	354	341	1647	0.40304	0.3051	0.48092	0.218
460	768	471	441	370	368	1787	0.41716	0.3	0.48092	0.23653
460	768	471	441	370	368	1787	0.41716	0.3	0.48092	0.23653
461	713	539	412	341	391	1907	0.38729	0.34331	0.44929	0.25242
462	769	499	449	378	337	2040	0.41771	0.31783	0.48964	0.27002
463	791	497	436	374	362	2076	0.42966	0.31656	0.47546	0.27478
463	791	497	436	374	362	2076	0.42966	0.31656	0.47546	0.27478
464	797	499	446	372	380	2207	0.43292	0.31783	0.48637	0.29212
465	786	503	469	342	368	2421	0.42694	0.32038	0.51145	0.32045
465	786	503	469	342	368	2421	0.42694	0.32038	0.51145	0.32045
466	797	515	437	360	362	2553	0.43292	0.32803	0.47655	0.33792
466	797	515	437	360	362	2553	0.43292	0.32803	0.47655	0.33792
467	816	528	432	369	382	2704	0.44324	0.33631	0.4711	0.35791
468	833	584	486	370	355	2812	0.45247	0.37197	0.52999	0.3722
468	833	584	486	370	355	2812	0.45247	0.37197	0.52999	0.3722
469	815	563	457	354	386	2937	0.44269	0.3586	0.49836	0.38875
470	814	570	456	378	384	3173	0.44215	0.36306	0.49727	0.41999
471	836	588	439	358	386	3304	0.4541	0.37452	0.47874	0.43733
471	836	588	439	358	386	3304	0.4541	0.37452	0.47874	0.43733
472	890	634	484	365	334	3347	0.48343	0.40382	0.52781	0.44302
473	868	633	494	376	346	3417	0.47148	0.40318	0.53871	0.45228
473	868	633	494	376	346	3417	0.47148	0.40318	0.53871	0.45228
474	852	641	508	366	378	3678	0.46279	0.40828	0.55398	0.48683
474	852	641	508	366	378	3678	0.46279	0.40828	0.55398	0.48683
475	938	616	487	359	350	3764	0.50951	0.39236	0.53108	0.49821
476	933	681	522	373	322	3939	0.50679	0.43376	0.56925	0.52138
476	933	681	522	373	322	3939	0.50679	0.43376	0.56925	0.52138
477	977	692	495	366	348	4092	0.53069	0.44076	0.5398	0.54163
477	977	692	495	366	348	4092	0.53069	0.44076	0.5398	0.54163
478	944	717	509	362	385	4091	0.51276	0.45669	0.55507	0.5415
478	944	717	509	362	385	4091	0.51276	0.45669	0.55507	0.5415
479	978	701	546	401	357	4309	0.53123	0.4465	0.59542	0.57035
480	1026	737	530	384	353	4487	0.55731	0.46943	0.57797	0.59391
481	1000	763	556	336	359	4611	0.54318	0.48599	0.60632	0.61032
482	1091	717	552	377	370	4883	0.59261	0.45669	0.60196	0.64633
483	1090	810	578	376	331	5001	0.59207	0.51592	0.63032	0.66195
483	1090	810	578	376	331	5001	0.59207	0.51592	0.63032	0.66195
484	1117	748	554	339	351	5119	0.60674	0.47643	0.60414	0.67756
485	1133	846	623	373	394	5284	0.61543	0.53885	0.67939	0.6994
486	1161	822	630	337	354	5310	0.63064	0.52357	0.68702	0.70285
487	1191	820	597	339	355	5469	0.64693	0.52229	0.65104	0.72389
488	1179	935	564	381	374	5609	0.64041	0.59554	0.61505	0.74242
488	1179	935	564	381	374	5609	0.64041	0.59554	0.61505	0.74242
489	1171	897	621	344	359	5665	0.63607	0.57134	0.67721	0.74983
490	1202	925	606	379	402	5835	0.65291	0.58917	0.66085	0.77234
491	1258	958	626	405	346	5931	0.68332	0.61019	0.68266	0.78504
492	1229	1021	613	369	373	5997	0.66757	0.65032	0.66848	0.79378
493	1220	995	678	324	333	6165	0.66268	0.63376	0.73937	0.81602
494	1306	979	615	346	382	6268	0.7094	0.62357	0.67067	0.82965
494	1306	979	615	346	382	6268	0.7094	0.62357	0.67067	0.82965
495	1312	1048	669	419	357	6353	0.71266	0.66752	0.72955	0.8409
496	1379	1062	670	376	357	6579	0.74905	0.67643	0.73064	0.87081
497	1331	1069	693	377	374	6496	0.72298	0.68089	0.75573	0.85983
498	1370	1099	694	358	346	6530	0.74416	0.7	0.75682	0.86433
499	1420	1123	658	370	346	6713	0.77132	0.71529	0.71756	0.88855
499	1420	1123	658	370	346	6713	0.77132	0.71529	0.71756	0.88855
500	1449	1099	663	357	345	6791	0.78707	0.7	0.72301	0.89887
501	1420	1134	688	384	366	6716	0.77132	0.72229	0.75027	0.88895
502	1492	1154	630	388	351	6841	0.81043	0.73503	0.68702	0.90549
503	1445	1197	714	379	385	6954	0.7849	0.76242	0.77863	0.92045
504	1542	1220	715	362	365	7048	0.83759	0.77707	0.77972	0.93289
504	1542	1220	715	362	365	7048	0.83759	0.77707	0.77972	0.93289
505	1495	1195	676	403	327	6965	0.81206	0.76115	0.73719	0.92191
505	1495	1195	676	403	327	6965	0.81206	0.76115	0.73719	0.92191
506	1504	1267	780	363	388	7174	0.81695	0.80701	0.8506	0.94957
507	1532	1297	761	372	333	7141	0.83216	0.82611	0.82988	0.9452
508	1520	1297	813	368	368	7211	0.82564	0.82611	0.88659	0.95447
509	1519	1283	770	376	346	7299	0.8251	0.8172	0.83969	0.96612
510	1568	1262	745	400	384	7153	0.85171	0.80382	0.81243	0.94679
510	1568	1262	745	400	384	7153	0.85171	0.80382	0.81243	0.94679
511	1598	1297	739	369	362	7282	0.86801	0.82611	0.80589	0.96386
512	1634	1299	803	373	379	7305	0.88756	0.82739	0.87568	0.96691
513	1640	1359	776	374	360	7527	0.89082	0.86561	0.84624	0.99629
514	1702	1368	788	376	379	7343	0.9245	0.87134	0.85932	0.97194
515	1644	1405	798	370	385	7468	0.89299	0.8949	0.87023	0.98848
515	1644	1405	798	370	385	7468	0.89299	0.8949	0.87023	0.98848
516	1758	1335	779	398	344	7290	0.95492	0.85032	0.84951	0.96492
517	1699	1409	831	393	375	7349	0.92287	0.89745	0.90622	0.97273
518	1718	1450	790	380	355	7414	0.93319	0.92357	0.8615	0.98134
519	1695	1437	817	380	340	7555	0.9207	0.91529	0.89095	1
520	1674	1420	859	400	365	7448	0.90929	0.90446	0.93675	0.98584
521	1632	1515	830	381	339	7357	0.88647	0.96497	0.90513	0.97379
521	1632	1515	830	381	339	7357	0.88647	0.96497	0.90513	0.97379
522	1746	1462	858	404	386	7501	0.9484	0.93121	0.93566	0.99285
523	1801	1486	822	373	358	7391	0.97827	0.9465	0.8964	0.97829
524	1762	1397	809	376	355	7415	0.95709	0.88981	0.88222	0.98147
525	1752	1452	786	337	338	7346	0.95166	0.92484	0.85714	0.97234
526	1740	1483	857	341	362	7326	0.94514	0.94459	0.93457	0.96969
526	1740	1483	857	341	362	7326	0.94514	0.94459	0.93457	0.96969
527	1683	1482	846	358	331	7226	0.91418	0.94395	0.92257	0.95645
528	1744	1487	855	368	373	7387	0.94731	0.94713	0.93239	0.97776
529	1688	1507	853	368	357	7528	0.91689	0.95987	0.93021	0.99643
530	1744	1518	856	397	348	7282	0.94731	0.96688	0.93348	0.96386
531	1776	1483	869	398	393	7305	0.96469	0.94459	0.94766	0.96691
531	1776	1483	869	398	393	7305	0.96469	0.94459	0.94766	0.96691
532	1756	1513	835	360	351	7236	0.95383	0.96369	0.91058	0.95778
532	1756	1513	835	360	351	7236	0.95383	0.96369	0.91058	0.95778
533	1761	1530	849	386	357	7218	0.95655	0.97452	0.92585	0.95539
534	1784	1485	868	396	384	7196	0.96904	0.94586	0.94656	0.95248
535	1766	1529	843	418	383	7155	0.95926	0.97389	0.9193	0.94705
536	1799	1570	854	396	364	6899	0.97719	1	0.9313	0.91317
537	1772	1541	852	395	342	6958	0.96252	0.98153	0.92912	0.92098
537	1772	1541	852	395	342	6958	0.96252	0.98153	0.92912	0.92098
538	1769	1505	853	372	384	6960	0.96089	0.9586	0.93021	0.92124
539	1807	1568	885	410	388	6939	0.98153	0.99873	0.9651	0.91846
540	1841	1523	881	389	373	7019	1	0.97006	0.96074	0.92905
541	1798	1532	867	384	372	6838	0.97664	0.9758	0.94547	0.9051
542	1793	1543	877	400	362	6759	0.97393	0.9828	0.95638	0.89464
542	1793	1543	877	400	362	6759	0.97393	0.9828	0.95638	0.89464
543	1763	1522	917	419	395	6594	0.95763	0.96943	1	0.8728
544	1731	1546	850	397	426	6681	0.94025	0.98471	0.92694	0.88432
545	1754	1464	839	339	379	6618	0.95274	0.93248	0.91494	0.87598
546	1721	1494	846	400	414	6506	0.93482	0.95159	0.92257	0.86115
547	1653	1496	828	390	353	6479	0.89788	0.95287	0.90294	0.85758
548	1731	1523	874	415	363	6460	0.94025	0.97006	0.95311	0.85506
548	1731	1523	874	415	363	6460	0.94025	0.97006	0.95311	0.85506
549	1749	1489	874	387	361	6269	0.95003	0.94841	0.95311	0.82978
550	1753	1534	846	381	361	6333	0.9522	0.97707	0.92257	0.83825
551	1657	1405	821	369	395	6186	0.90005	0.8949	0.89531	0.8188
552	1699	1537	861	400	377	6160	0.92287	0.97898	0.93893	0.81535
553	1764	1506	791	347	345	6235	0.95817	0.95924	0.8626	0.82528
553	1764	1506	791	347	345	6235	0.95817	0.95924	0.8626	0.82528
554	1673	1401	801	372	344	6144	0.90875	0.89236	0.8735	0.81324
555	1691	1458	845	361	353	6050	0.91852	0.92866	0.92148	0.80079
556	1628	1385	850	403	355	5787	0.8843	0.88217	0.92694	0.76598
557	1658	1400	821	367	356	5919	0.9006	0.89172	0.89531	0.78345
558	1616	1439	797	367	367	5815	0.87778	0.91656	0.86914	0.76969
558	1616	1439	797	367	367	5815	0.87778	0.91656	0.86914	0.76969
559	1626	1415	798	360	360	5860	0.88322	0.90127	0.87023	0.77565
560	1560	1400	871	349	397	5750	0.84737	0.89172	0.94984	0.76109
561	1607	1337	774	400	325	5542	0.8729	0.85159	0.84406	0.73355
562	1564	1364	791	366	371	5589	0.84954	0.86879	0.8626	0.73977
563	1572	1356	835	362	329	5537	0.85388	0.86369	0.91058	0.73289
564	1557	1393	802	365	350	5338	0.84574	0.88726	0.87459	0.70655
564	1557	1393	802	365	350	5338	0.84574	0.88726	0.87459	0.70655
565	1638	1351	755	355	347	5277	0.88973	0.86051	0.82334	0.69848
566	1525	1330	829	379	364	5223	0.82835	0.84713	0.90403	0.69133
567	1578	1351	794	352	339	5106	0.85714	0.86051	0.86587	0.67584
568	1511	1346	815	411	363	5217	0.82075	0.85732	0.88877	0.69054
569	1528	1276	763	379	365	5096	0.82998	0.81274	0.83206	0.67452
569	1528	1276	763	379	365	5096	0.82998	0.81274	0.83206	0.67452
570	1550	1334	781	373	355	5051	0.84193	0.84968	0.85169	0.66856
571	1522	1182	791	362	361	4895	0.82672	0.75287	0.8626	0.64792
572	1498	1346	773	356	408	4868	0.81369	0.85732	0.84297	0.64434
573	1486	1230	767	369	398	4780	0.80717	0.78344	0.83642	0.63269
574	1464	1245	752	349	352	4815	0.79522	0.79299	0.82007	0.63733
574	1464	1245	752	349	352	4815	0.79522	0.79299	0.82007	0.63733
575	1452	1253	747	338	372	4696	0.7887	0.79809	0.81461	0.62158
575	1452	1253	747	338	372	4696	0.7887	0.79809	0.81461	0.62158
576	1415	1275	767	385	352	4719	0.7686	0.8121	0.83642	0.62462
577	1405	1217	741	352	313	4521	0.76317	0.77516	0.80807	0.59841
578	1366	1211	695	374	393	4652	0.74199	0.77134	0.75791	0.61575
579	1390	1212	753	382	330	4486	0.75502	0.77197	0.82116	0.59378
580	1470	1200	750	383	313	4529	0.79848	0.76433	0.81788	0.59947
580	1470	1200	750	383	313	4529	0.79848	0.76433	0.81788	0.59947
581	1425	1299	758	360	325	4379	0.77404	0.82739	0.82661	0.57962
582	1404	1227	737	353	362	4257	0.76263	0.78153	0.80371	0.56347
583	1275	1154	729	344	387	4178	0.69256	0.73503	0.79498	0.55301
584	1321	1166	731	379	343	4190	0.71754	0.74268	0.79716	0.5546
585	1363	1162	690	374	370	4125	0.74036	0.74013	0.75245	0.546
585	1363	1162	690	374	370	4125	0.74036	0.74013	0.75245	0.546
586	1313	1151	728	405	323	4143	0.7132	0.73312	0.79389	0.54838
587	1341	1097	708	357	359	4051	0.72841	0.69873	0.77208	0.5362
588	1345	1135	765	378	386	4004	0.73058	0.72293	0.83424	0.52998
589	1277	1073	678	375	357	3779	0.69364	0.68344	0.73937	0.5002
590	1265	1061	689	405	313	3862	0.68713	0.6758	0.75136	0.51118
591	1224	1102	677	346	371	3797	0.66486	0.70191	0.73828	0.50258
591	1224	1102	677	346	371	3797	0.66486	0.70191	0.73828	0.50258
592	1198	1056	676	380	346	3584	0.65073	0.67261	0.73719	0.47439
593	1223	1035	710	388	394	3553	0.66431	0.65924	0.77426	0.47028
594	1208	1091	700	374	361	3566	0.65617	0.6949	0.76336	0.47201
595	1208	1111	702	340	378	3597	0.65617	0.70764	0.76554	0.47611
596	1219	1055	664	401	350	3441	0.66214	0.67197	0.7241	0.45546
596	1219	1055	664	401	350	3441	0.66214	0.67197	0.7241	0.45546
597	1175	1069	649	386	361	3474	0.63824	0.68089	0.70774	0.45983
598	1153	1022	689	381	360	3396	0.62629	0.65096	0.75136	0.4495
599	1142	1094	655	400	363	3436	0.62032	0.69682	0.71429	0.4548
600	1114	1012	629	347	404	3284	0.60511	0.64459	0.68593	0.43468
601	1127	1032	640	406	359	3306	0.61217	0.65732	0.69793	0.43759
601	1127	1032	640	406	359	3306	0.61217	0.65732	0.69793	0.43759
602	1071	984	675	359	330	3193	0.58175	0.62675	0.7361	0.42263
602	1071	984	675	359	330	3193	0.58175	0.62675	0.7361	0.42263
603	1066	972	631	378	366	3251	0.57903	0.61911	0.68811	0.43031
604	1129	942	623	332	358	3132	0.61325	0.6	0.67939	0.41456
605	1068	975	613	370	351	3021	0.58012	0.62102	0.66848	0.39987
606	1120	963	690	375	339	3008	0.60837	0.61338	0.75245	0.39815
607	1081	987	618	361	374	2903	0.58718	0.62866	0.67394	0.38425
607	1081	987	618	361	374	2903	0.58718	0.62866	0.67394	0.38425
608	1038	1004	645	373	384	2831	0.56382	0.63949	0.70338	0.37472
609	1037	925	647	377	355	2763	0.56328	0.58917	0.70556	0.36572
610	1059	933	583	386	379	2757	0.57523	0.59427	0.63577	0.36492
611	1076	898	621	376	377	2713	0.58446	0.57197	0.67721	0.3591
612	1041	916	575	396	385	2766	0.56545	0.58344	0.62704	0.36612
612	1041	916	575	396	385	2766	0.56545	0.58344	0.62704	0.36612
613	1027	909	600	383	352	2683	0.55785	0.57898	0.65431	0.35513
614	1044	876	557	420	375	2663	0.56708	0.55796	0.60742	0.35248
615	998	889	562	413	372	2553	0.5421	0.56624	0.61287	0.33792
616	978	856	616	373	365	2458	0.53123	0.54522	0.67176	0.32535
617	955	806	599	354	353	2484	0.51874	0.51338	0.65322	0.32879
618	899	911	572	367	387	2499	0.48832	0.58025	0.62377	0.33077
618	899	911	572	367	387	2499	0.48832	0.58025	0.62377	0.33077
619	947	882	614	351	358	2433	0.51439	0.56178	0.66957	0.32204
620	948	829	572	369	321	2324	0.51494	0.52803	0.62377	0.30761
621	957	826	520	352	427	2340	0.51983	0.52611	0.56707	0.30973
622	920	808	527	336	368	2224	0.49973	0.51465	0.5747	0.29437
623	870	818	564	347	361	2247	0.47257	0.52102	0.61505	0.29742
623	870	818	564	347	361	2247	0.47257	0.52102	0.61505	0.29742
624	914	746	523	357	364	2211	0.49647	0.47516	0.57034	0.29265
625	868	776	532	355	360	2209	0.47148	0.49427	0.58015	0.29239
626	891	752	561	364	315	2160	0.48398	0.47898	0.61178	0.2859
627	871	778	506	356	354	2167	0.47311	0.49554	0.5518	0.28683
628	874	771	554	382	342	2112	0.47474	0.49108	0.60414	0.27955
628	874	771	554	382	342	2112	0.47474	0.49108	0.60414	0.27955
629	851	723	546	363	348	2029	0.46225	0.46051	0.59542	0.26856
629	851	723	546	363	348	2029	0.46225	0.46051	0.59542	0.26856
630	872	801	522	378	385	1981	0.47366	0.51019	0.56925	0.26221
631	822	698	568	363	331	1998	0.4465	0.44459	0.61941	0.26446
632	890	736	553	353	335	1899	0.48343	0.46879	0.60305	0.25136
633	787	764	498	350	368	1857	0.42749	0.48662	0.54308	0.2458
634	783	765	552	352	389	1927	0.42531	0.48726	0.60196	0.25506
634	783	765	552	352	389	1927	0.42531	0.48726	0.60196	0.25506
635	798	713	553	368	340	1874	0.43346	0.45414	0.60305	0.24805
636	763	750	517	361	340	1732	0.41445	0.47771	0.56379	0.22925
637	760	729	510	366	335	1825	0.41282	0.46433	0.55616	0.24156
638	760	665	577	372	315	1658	0.41282	0.42357	0.62923	0.21946
639	741	709	531	350	356	1709	0.4025	0.45159	0.57906	0.22621
639	741	709	531	350	356	1709	0.4025	0.45159	0.57906	0.22621
640	769	669	502	361	327	1763	0.41771	0.42611	0.54744	0.23336
641	810	712	496	355	344	1638	0.43998	0.4535	0.54089	0.21681
642	723	705	454	353	327	1702	0.39272	0.44904	0.49509	0.22528
643	744	643	495	328	312	1587	0.40413	0.40955	0.5398	0.21006
644	785	653	460	340	350	1545	0.4264	0.41592	0.50164	0.2045
645	700	647	486	352	341	1529	0.38023	0.4121	0.52999	0.20238
645	700	647	486	352	341	1529	0.38023	0.4121	0.52999	0.20238
646	706	662	490	333	344	1576	0.38349	0.42166	0.53435	0.2086
647	704	607	468	334	337	1569	0.3824	0.38662	0.51036	0.20768
648	681	616	461	365	356	1486	0.36991	0.39236	0.50273	0.19669
649	729	597	477	369	345	1479	0.39598	0.38025	0.52017	0.19576
650	695	639	491	364	408	1407	0.37751	0.40701	0.53544	0.18623
650	695	639	491	364	408	1407	0.37751	0.40701	0.53544	0.18623
651	707	640	496	357	345	1435	0.38403	0.40764	0.54089	0.18994
652	646	626	452	389	349	1374	0.3509	0.39873	0.49291	0.18187
653	701	562	442	360	336	1393	0.38077	0.35796	0.48201	0.18438
654	689	591	496	365	355	1335	0.37425	0.37643	0.54089	0.1767
655	656	569	428	360	387	1331	0.35633	0.36242	0.46674	0.17617
655	656	569	428	360	387	1331	0.35633	0.36242	0.46674	0.17617
656	679	586	475	349	345	1401	0.36882	0.37325	0.51799	0.18544
657	655	563	468	363	393	1293	0.35578	0.3586	0.51036	0.17114
658	667	577	486	315	352	1293	0.3623	0.36752	0.52999	0.17114
659	634	578	451	356	363	1236	0.34438	0.36815	0.49182	0.1636
660	678	548	433	366	382	1246	0.36828	0.34904	0.47219	0.16492
661	649	571	431	348	368	1163	0.35253	0.36369	0.47001	0.15394
661	649	571	431	348	368	1163	0.35253	0.36369	0.47001	0.15394
662	578	604	442	370	357	1143	0.31396	0.38471	0.48201	0.15129
663	635	567	451	338	344	1205	0.34492	0.36115	0.49182	0.1595
664	624	563	441	350	374	1185	0.33895	0.3586	0.48092	0.15685
665	617	549	481	352	378	1132	0.33514	0.34968	0.52454	0.14983
666	577	516	484	333	364	1098	0.31342	0.32866	0.52781	0.14533
666	577	516	484	333	364	1098	0.31342	0.32866	0.52781	0.14533
667	567	522	492	399	364	1109	0.30798	0.33248	0.53653	0.14679
668	609	573	476	344	332	1035	0.3308	0.36497	0.51908	0.137
669	599	540	494	351	327	1081	0.32537	0.34395	0.53871	0.14308
670	599	532	424	353	344	1034	0.32537	0.33885	0.46238	0.13686
671	600	532	439	367	376	1052	0.32591	0.33885	0.47874	0.13925
671	600	532	439	367	376	1052	0.32591	0.33885	0.47874	0.13925
672	566	555	439	384	334	1001	0.30744	0.3535	0.47874	0.1325
672	566	555	439	384	334	1001	0.30744	0.3535	0.47874	0.1325
673	584	499	442	355	337	1001	0.31722	0.31783	0.48201	0.1325
674	562	485	433	360	377	989	0.30527	0.30892	0.47219	0.13091
675	599	536	416	376	382	915	0.32537	0.3414	0.45365	0.12111
676	563	515	488	319	381	1001	0.30581	0.32803	0.53217	0.1325
677	552	497	433	356	339	906	0.29984	0.31656	0.47219	0.11992
677	552	497	433	356	339	906	0.29984	0.31656	0.47219	0.11992
678	554	494	428	390	345	948	0.30092	0.31465	0.46674	0.12548
679	552	498	426	340	347	871	0.29984	0.3172	0.46456	0.11529
680	509	521	431	361	347	923	0.27648	0.33185	0.47001	0.12217
681	532	465	450	341	330	882	0.28897	0.29618	0.49073	0.11674
682	524	475	407	346	350	898	0.28463	0.30255	0.44384	0.11886
682	524	475	407	346	350	898	0.28463	0.30255	0.44384	0.11886
683	577	476	415	368	324	863	0.31342	0.30318	0.45256	0.11423
684	535	511	420	356	323	801	0.2906	0.32548	0.45802	0.10602
685	491	454	419	348	334	844	0.2667	0.28917	0.45692	0.11171
686	571	501	438	356	343	781	0.31016	0.31911	0.47764	0.10338
687	520	497	390	355	322	845	0.28246	0.31656	0.4253	0.11185
688	521	508	404	329	342	777	0.283	0.32357	0.44057	0.10285
688	521	508	404	329	342	777	0.283	0.32357	0.44057	0.10285
689	519	515	417	351	320	819	0.28191	0.32803	0.45474	0.10841
690	494	439	416	351	367	760	0.26833	0.27962	0.45365	0.1006
691	515	442	399	326	334	741	0.27974	0.28153	0.43511	0.09808
692	475	452	425	359	399	752	0.25801	0.2879	0.46347	0.09954
693	485	467	389	339	327	760	0.26344	0.29745	0.42421	0.1006
693	485	467	389	339	327	760	0.26344	0.29745	0.42421	0.1006
694	462	439	441	334	354	772	0.25095	0.27962	0.48092	0.10218
695	505	427	420	375	342	752	0.27431	0.27197	0.45802	0.09954
696	502	439	403	391	338	741	0.27268	0.27962	0.43948	0.09808
697	448	417	394	377	358	713	0.24335	0.26561	0.42966	0.09437
698	520	439	441	326	344	688	0.28246	0.27962	0.48092	0.09107
698	520	439	441	326	344	688	0.28246	0.27962	0.48092	0.09107
699	486	435	423	355	351	726	0.26399	0.27707	0.46129	0.0961
699	486	435	423	355	351	726	0.26399	0.27707	0.46129	0.0961
700	473	449	370	306	362	651	0.25693	0.28599	0.40349	0.08617

## Sheet: Fig3a
Time[µs]	Intensity[Cnts]	Time[µs]	Fit
0	56	0	---
0.0064	3891	0.0064	---
0.0128	3423	0.0128	---
0.0192	3189	0.0192	---
0.0256	3536	0.0256	---
0.032	7178	0.032	---
0.0384	6613	0.0384	---
0.0448	6306	0.0448	---
0.0512	7104	0.0512	---
0.0576	9989	0.0576	---
0.064	9606	0.064	---
0.0704	9226	0.0704	---
0.0768	10475	0.0768	---
0.0832	12905	0.0832	---
0.0896	12349	0.0896	---
0.096	12126	0.096	---
0.1024	13728	0.1024	---
0.1088	15618	0.1088	---
0.1152	15049	0.1152	---
0.1216	14609	0.1216	---
0.128	17024	0.128	---
0.1344	18342	0.1344	---
0.1408	17894	0.1408	---
0.1472	17546	0.1472	---
0.1536	19814	0.1536	---
0.16	21419	0.16	---
0.1664	20277	0.1664	---
0.1728	20294	0.1728	---
0.1792	22821	0.1792	---
0.1856	23512	0.1856	---
0.192	22818	0.192	---
0.1984	22786	0.1984	---
0.2048	26032	0.2048	---
0.2112	25973	0.2112	---
0.2176	25635	0.2176	---
0.224	24694	0.224	---
0.2304	28684	0.2304	---
0.2368	28551	0.2368	---
0.2432	27871	0.2432	---
0.2496	27238	0.2496	---
0.256	31510	0.256	---
0.2624	30765	0.2624	---
0.2688	30132	0.2688	---
0.2752	29908	0.2752	---
0.2816	33987	0.2816	---
0.288	33286	0.288	---
0.2944	32495	0.2944	---
0.3008	32734	0.3008	---
0.3072	35889	0.3072	---
0.3136	35257	0.3136	---
0.32	34169	0.32	---
0.3264	35480	0.3264	---
0.3328	38480	0.3328	---
0.3392	37412	0.3392	---
0.3456	36555	0.3456	---
0.352	37574	0.352	---
0.3584	40026	0.3584	---
0.3648	38978	0.3648	---
0.3712	38406	0.3712	---
0.3776	39986	0.3776	---
0.384	41632	0.384	---
0.3904	40866	0.3904	---
0.3968	40149	0.3968	---
0.4032	42427	0.4032	---
0.4096	43531	0.4096	---
0.416	42859	0.416	---
0.4224	41725	0.4224	---
0.4288	44386	0.4288	---
0.4352	45244	0.4352	---
0.4416	44515	0.4416	---
0.448	42975	0.448	---
0.4544	46185	0.4544	---
0.4608	46791	0.4608	---
0.4672	45994	0.4672	---
0.4736	45454	0.4736	---
0.48	48504	0.48	---
0.4864	48156	0.4864	---
0.4928	47312	0.4928	---
0.4992	47027	0.4992	---
0.5056	50659	0.5056	---
0.512	49603	0.512	---
0.5184	48762	0.5184	---
0.5248	47876	0.5248	---
0.5312	52331	0.5312	---
0.5376	51320	0.5376	---
0.544	50237	0.544	---
0.5504	49803	0.5504	---
0.5568	53453	0.5568	---
0.5632	52339	0.5632	---
0.5696	51260	0.5696	---
0.576	51617	0.576	---
0.5824	54859	0.5824	---
0.5888	53451	0.5888	---
0.5952	52543	0.5952	---
0.6016	53296	0.6016	---
0.608	55735	0.608	---
0.6144	54575	0.6144	---
0.6208	54204	0.6208	---
0.6272	55125	0.6272	---
0.6336	56533	0.6336	---
0.64	56346	0.64	---
0.6464	55210	0.6464	---
0.6528	56519	0.6528	---
0.6592	58292	0.6592	---
0.6656	57474	0.6656	---
0.672	56702	0.672	---
0.6784	58521	0.6784	---
0.6848	59401	0.6848	---
0.6912	58515	0.6912	---
0.6976	57420	0.6976	---
0.704	60046	0.704	---
0.7104	60370	0.7104	---
0.7168	59227	0.7168	---
0.7232	58736	0.7232	---
0.7296	60948	0.7296	---
0.736	61079	0.736	---
0.7424	59581	0.7424	---
0.7488	59381	0.7488	---
0.7552	62871	0.7552	---
0.7616	62322	0.7616	---
0.768	61537	0.768	---
0.7744	60664	0.7744	---
0.7808	63920	0.7808	---
0.7872	63104	0.7872	---
0.7936	62170	0.7936	---
0.8	61535	0.8	---
0.8064	65340	0.8064	---
0.8128	63751	0.8128	---
0.8192	63176	0.8192	---
0.8256	63018	0.8256	---
0.832	65741	0.832	---
0.8384	65045	0.8384	---
0.8448	63636	0.8448	---
0.8512	64294	0.8512	---
0.8576	66713	0.8576	---
0.864	65309	0.864	---
0.8704	64530	0.8704	---
0.8768	65656	0.8768	---
0.8832	67649	0.8832	---
0.8896	66585	0.8896	---
0.896	65671	0.896	---
0.9024	66765	0.9024	---
0.9088	68119	0.9088	---
0.9152	66963	0.9152	---
0.9216	65981	0.9216	---
0.928	67943	0.928	---
0.9344	68318	0.9344	---
0.9408	68008	0.9408	---
0.9472	67483	0.9472	---
0.9536	69192	0.9536	---
0.96	69450	0.96	---
0.9664	68233	0.9664	---
0.9728	67678	0.9728	---
0.9792	70116	0.9792	---
0.9856	70395	0.9856	---
0.992	69010	0.992	---
0.9984	68121	0.9984	---
1.0048	71099	1.0048	---
1.0112	71036	1.0112	---
1.0176	70013	1.0176	---
1.024	69152	1.024	---
1.0304	71790	1.0304	---
1.0368	71555	1.0368	---
1.0432	70385	1.0432	---
1.0496	69514	1.0496	---
1.056	72896	1.056	---
1.0624	71719	1.0624	---
1.0688	70796	1.0688	---
1.0752	70645	1.0752	---
1.0816	73871	1.0816	---
1.088	72681	1.088	---
1.0944	71261	1.0944	---
1.1008	71675	1.1008	---
1.1072	74700	1.1072	---
1.1136	73009	1.1136	---
1.12	71940	1.12	---
1.1264	72304	1.1264	---
1.1328	74772	1.1328	---
1.1392	73452	1.1392	---
1.1456	73155	1.1456	---
1.152	73578	1.152	---
1.1584	75505	1.1584	---
1.1648	74278	1.1648	---
1.1712	72639	1.1712	---
1.1776	74635	1.1776	---
1.184	76284	1.184	---
1.1904	74698	1.1904	---
1.1968	73669	1.1968	---
1.2032	74951	1.2032	---
1.2096	75991	1.2096	---
1.216	75137	1.216	---
1.2224	74154	1.2224	---
1.2288	76417	1.2288	---
1.2352	76529	1.2352	---
1.2416	75191	1.2416	---
1.248	74961	1.248	---
1.2544	73339	1.2544	---
1.2608	72876	1.2608	---
1.2672	72234	1.2672	---
1.2736	71351	1.2736	---
1.28	70316	1.28	---
1.2864	70277	1.2864	---
1.2928	69076	1.2928	---
1.2992	69090	1.2992	68078.5
1.3056	67961	1.3056	67483.1
1.312	66975	1.312	66893.7
1.3184	66917	1.3184	66310.1
1.3248	66254	1.3248	65732.6
1.3312	65422	1.3312	65161.6
1.3376	65116	1.3376	64595.9
1.344	64135	1.344	64035.6
1.3504	63282	1.3504	63480.9
1.3568	62833	1.3568	62932.4
1.3632	62418	1.3632	62388.1
1.3696	62234	1.3696	61850.8
1.376	61452	1.376	61318.9
1.3824	61600	1.3824	60792.1
1.3888	60164	1.3888	60268.5
1.3952	60191	1.3952	59752.3
1.4016	59426	1.4016	59241.3
1.408	58792	1.408	58733.9
1.4144	58373	1.4144	58235.4
1.4208	57657	1.4208	57739.2
1.4272	57141	1.4272	57246.4
1.4336	56994	1.4336	56758.2
1.44	56048	1.44	56277.6
1.4464	55875	1.4464	55800.6
1.4528	55247	1.4528	55328.2
1.4592	54928	1.4592	54862
1.4656	53899	1.4656	54400.3
1.472	54019	1.472	53941.8
1.4784	52914	1.4784	53489
1.4848	52748	1.4848	53038.4
1.4912	52662	1.4912	52593.1
1.4976	51774	1.4976	52152.5
1.504	51588	1.504	51715.6
1.5104	51139	1.5104	51286.1
1.5168	50769	1.5168	50857.1
1.5232	50608	1.5232	50434.6
1.5296	50151	1.5296	50012.9
1.536	49251	1.536	49599.5
1.5424	49457	1.5424	49186.5
1.5488	48649	1.5488	48781.9
1.5552	48106	1.5552	48379.4
1.5616	47759	1.5616	47978.6
1.568	47632	1.568	47583.8
1.5744	46857	1.5744	47193.7
1.5808	46075	1.5808	46804.1
1.5872	46278	1.5872	46420.8
1.5936	45910	1.5936	46042.3
1.6	45474	1.6	45663.1
1.6064	44693	1.6064	45290.4
1.6128	44660	1.6128	44922.8
1.6192	43978	1.6192	44558.2
1.6256	43789	1.6256	44192
1.632	43568	1.632	43834
1.6384	43214	1.6384	43479.7
1.6448	42825	1.6448	43129
1.6512	42635	1.6512	42780.4
1.6576	42661	1.6576	42435.2
1.664	41992	1.664	42093.5
1.6704	41699	1.6704	41756.5
1.6768	41327	1.6768	41417.1
1.6832	41174	1.6832	41086.2
1.6896	40686	1.6896	40757.5
1.696	40618	1.696	40431.8
1.7024	39857	1.7024	40108.4
1.7088	39587	1.7088	39788.6
1.7152	39395	1.7152	39472.4
1.7216	39145	1.7216	39157.1
1.728	38870	1.728	38846.8
1.7344	38361	1.7344	38540.4
1.7408	38067	1.7408	38233.4
1.7472	37832	1.7472	37932.4
1.7536	37560	1.7536	37631.6
1.76	37082	1.76	37336.3
1.7664	37100	1.7664	37042.2
1.7728	36657	1.7728	36751.9
1.7792	36555	1.7792	36463
1.7856	36078	1.7856	36177.7
1.792	35827	1.792	35895.4
1.7984	35490	1.7984	35613.5
1.8048	35640	1.8048	35337
1.8112	34804	1.8112	35062.4
1.8176	34497	1.8176	34788.9
1.824	34691	1.824	34518.3
1.8304	33946	1.8304	34251.5
1.8368	33920	1.8368	33987.4
1.8432	33549	1.8432	33724.6
1.8496	33437	1.8496	33463.8
1.856	33449	1.856	33206.3
1.8624	32463	1.8624	32951
1.8688	32764	1.8688	32697.3
1.8752	32449	1.8752	32446.5
1.8816	32162	1.8816	32198.4
1.888	31868	1.888	31951.9
1.8944	31271	1.8944	31708
1.9008	31708	1.9008	31467.2
1.9072	31127	1.9072	31227.7
1.9136	31096	1.9136	30989.9
1.92	30686	1.92	30755
1.9264	30441	1.9264	30522
1.9328	30577	1.9328	30291.2
1.9392	29986	1.9392	30062
1.9456	30430	1.9456	29835.3
1.952	29871	1.952	29610.6
1.9584	29278	1.9584	29388.3
1.9648	29062	1.9648	29167.3
1.9712	29160	1.9712	28948.6
1.9776	28754	1.9776	28731.8
1.984	28594	1.984	28517
1.9904	28065	1.9904	28304.1
1.9968	28003	1.9968	28093
2.0032	27661	2.0032	27883.9
2.0096	27828	2.0096	27676.6
2.016	27631	2.016	27471.1
2.0224	27514	2.0224	27267.7
2.0288	26820	2.0288	27065.7
2.0352	26713	2.0352	26865.8
2.0416	26700	2.0416	26667.6
2.048	26435	2.048	26471.5
2.0544	26299	2.0544	26276.5
2.0608	25816	2.0608	26083.5
2.0672	26026	2.0672	25892.3
2.0736	25653	2.0736	25702.5
2.08	25571	2.08	25514.6
2.0864	25644	2.0864	25328.4
2.0928	25414	2.0928	25143.9
2.0992	24805	2.0992	24960.3
2.1056	24947	2.1056	24779.1
2.112	24544	2.112	24599
2.1184	24460	2.1184	24421.2
2.1248	24363	2.1248	24244.2
2.1312	24128	2.1312	24069.5
2.1376	24069	2.1376	23895.1
2.144	23596	2.144	23723.7
2.1504	23589	2.1504	23552.2
2.1568	23304	2.1568	23383.6
2.1632	22990	2.1632	23214.8
2.1696	23063	2.1696	23049.2
2.176	22806	2.176	22884.4
2.1824	22717	2.1824	22721
2.1888	22640	2.1888	22558.2
2.1952	22512	2.1952	22398.3
2.2016	22520	2.2016	22238.7
2.208	22125	2.208	22080.7
2.2144	22172	2.2144	21924.5
2.2208	22029	2.2208	21769.4
2.2272	21741	2.2272	21614.6
2.2336	21487	2.2336	21463
2.24	21261	2.24	21311.3
2.2464	21274	2.2464	21161.6
2.2528	20979	2.2528	21012.4
2.2592	21039	2.2592	20864.3
2.2656	20526	2.2656	20718.9
2.272	20510	2.272	20573
2.2784	20377	2.2784	20430
2.2848	20351	2.2848	20286.6
2.2912	20414	2.2912	20145.9
2.2976	19788	2.2976	20004.6
2.304	20087	2.304	19866.6
2.3104	19769	2.3104	19729.4
2.3168	19626	2.3168	19591.9
2.3232	19549	2.3232	19456.5
2.3296	19203	2.3296	19321.3
2.336	19333	2.336	19188.3
2.3424	19114	2.3424	19056.5
2.3488	19144	2.3488	18924.3
2.3552	18730	2.3552	18794.9
2.3616	18347	2.3616	18666.2
2.368	18679	2.368	18538.6
2.3744	18427	2.3744	18410.4
2.3808	18269	2.3808	18285.4
2.3872	18312	2.3872	18160.5
2.3936	17971	2.3936	18037.2
2.4	17741	2.4	17915
2.4064	18015	2.4064	17791.8
2.4128	17742	2.4128	17671.1
2.4192	17502	2.4192	17551.1
2.4256	17578	2.4256	17433.3
2.432	17248	2.432	17315.4
2.4384	17298	2.4384	17198.7
2.4448	17181	2.4448	17082.5
2.4512	17060	2.4512	16967.8
2.4576	17043	2.4576	16853.8
2.464	16819	2.464	16740.9
2.4704	16726	2.4704	16628.4
2.4768	16341	2.4768	16517.2
2.4832	16477	2.4832	16406.8
2.4896	16229	2.4896	16296.7
2.496	16263	2.496	16188.9
2.5024	16037	2.5024	16080.9
2.5088	15982	2.5088	15973.6
2.5152	15984	2.5152	15867.7
2.5216	15739	2.5216	15762.1
2.528	15852	2.528	15658.3
2.5344	15675	2.5344	15554.8
2.5408	15609	2.5408	15452.2
2.5472	15449	2.5472	15350.2
2.5536	15405	2.5536	15248.9
2.56	15292	2.56	15149
2.5664	15117	2.5664	15049.2
2.5728	15143	2.5728	14950.4
2.5792	14994	2.5792	14852.7
2.5856	14805	2.5856	14755.8
2.592	14738	2.592	14659.1
2.5984	14285	2.5984	14563.2
2.6048	14513	2.6048	14468.4
2.6112	14435	2.6112	14373.9
2.6176	14220	2.6176	14281.1
2.624	14048	2.624	14188.3
2.6304	14213	2.6304	14096.7
2.6368	13981	2.6368	14005.4
2.6432	14112	2.6432	13914.9
2.6496	13837	2.6496	13825
2.656	13845	2.656	13735.9
2.6624	13529	2.6624	13647.1
2.6688	13617	2.6688	13559.4
2.6752	13494	2.6752	13472.5
2.6816	13438	2.6816	13386.1
2.688	13316	2.688	13300.5
2.6944	13225	2.6944	13215.1
2.7008	13151	2.7008	13130.9
2.7072	13071	2.7072	13047
2.7136	12968	2.7136	12963.8
2.72	12868	2.72	12881.4
2.7264	12737	2.7264	12799.7
2.7328	12856	2.7328	12718.3
2.7392	12437	2.7392	12637.8
2.7456	12789	2.7456	12557.7
2.752	12517	2.752	12478.3
2.7584	12445	2.7584	12399.5
2.7648	12242	2.7648	12321.3
2.7712	12435	2.7712	12243.8
2.7776	12154	2.7776	12166.7
2.784	12101	2.784	12090.2
2.7904	12279	2.7904	12014.4
2.7968	11800	2.7968	11939.1
2.8032	11859	2.8032	11864.4
2.8096	11844	2.8096	11790.3
2.816	11594	2.816	11716.7
2.8224	11689	2.8224	11643.7
2.8288	11692	2.8288	11571.1
2.8352	11506	2.8352	11499.1
2.8416	11435	2.8416	11427.6
2.848	11333	2.848	11356.8
2.8544	11235	2.8544	11286.4
2.8608	11320	2.8608	11216.6
2.8672	11261	2.8672	11147.1
2.8736	10950	2.8736	11078.4
2.88	11209	2.88	11010.1
2.8864	11142	2.8864	10942.1
2.8928	10932	2.8928	10874.7
2.8992	10744	2.8992	10808
2.9056	10843	2.9056	10742
2.912	10687	2.912	10676.1
2.9184	10714	2.9184	10610.6
2.9248	10704	2.9248	10545.7
2.9312	10367	2.9312	10481.2
2.9376	10453	2.9376	10417.7
2.944	10373	2.944	10354
2.9504	10321	2.9504	10291
2.9568	10279	2.9568	10228.3
2.9632	10236	2.9632	10166.5
2.9696	10150	2.9696	10104.8
2.976	10104	2.976	10043.5
2.9824	9923	2.9824	9982.97
2.9888	9837	2.9888	9922.55
2.9952	9823	2.9952	9862.48
3.0016	9754	3.0016	9803.38
3.008	9682	3.008	9744.11
3.0144	9842	3.0144	9685.93
3.0208	9758	3.0208	9627.48
3.0272	9676	3.0272	9569.44
3.0336	9337	3.0336	9512.41
3.04	9420	3.04	9455.14
3.0464	9435	3.0464	9398.99
3.0528	9440	3.0528	9342.59
3.0592	9216	3.0592	9287.05
3.0656	9280	3.0656	9232.14
3.072	9264	3.072	9176.76
3.0784	9023	3.0784	9122.43
3.0848	9018	3.0848	9067.79
3.0912	9006	3.0912	9014.56
3.0976	8880	3.0976	8961.49
3.104	8946	3.104	8907.78
3.1104	8846	3.1104	8855.45
3.1168	8736	3.1168	8803.55
3.1232	8913	3.1232	8750.99
3.1296	8683	3.1296	8699.56
3.136	8783	3.136	8648.56
3.1424	8648	3.1424	8598.22
3.1488	8643	3.1488	8547.07
3.1552	8397	3.1552	8496.92
3.1616	8484	3.1616	8447.44
3.168	8399	3.168	8398.29
3.1744	8331	3.1744	8349.23
3.1808	8288	3.1808	8300.84
3.1872	8330	3.1872	8252.49
3.1936	8241	3.1936	8203.39
3.2	8261	3.2	8155.72
3.2064	8123	3.2064	8108.51
3.2128	8023	3.2128	8061.82
3.2192	8003	3.2192	8015.26
3.2256	7977	3.2256	7968.98
3.232	8063	3.232	7922.9
3.2384	7847	3.2384	7876.89
3.2448	7751	3.2448	7831.49
3.2512	7848	3.2512	7786.45
3.2576	7761	3.2576	7741.32
3.264	7503	3.264	7697.06
3.2704	7734	3.2704	7652.55
3.2768	7576	3.2768	7608.96
3.2832	7744	3.2832	7564.98
3.2896	7604	3.2896	7521.93
3.296	7388	3.296	7478.57
3.3024	7405	3.3024	7436.05
3.3088	7487	3.3088	7393.55
3.3152	7315	3.3152	7351.58
3.3216	7282	3.3216	7309.61
3.328	7389	3.328	7267.94
3.3344	7148	3.3344	7227
3.3408	7197	3.3408	7185.86
3.3472	7119	3.3472	7144.99
3.3536	7189	3.3536	7104.4
3.36	7028	3.36	7064.49
3.3664	7064	3.3664	7024.62
3.3728	6873	3.3728	6984.82
3.3792	6925	3.3792	6945.47
3.3856	6888	3.3856	6906.19
3.392	6838	3.392	6867.35
3.3984	6885	3.3984	6828.76
3.4048	6761	3.4048	6790.43
3.4112	6785	3.4112	6752.33
3.4176	6795	3.4176	6714.49
3.424	6613	3.424	6676.9
3.4304	6586	3.4304	6639.7
3.4368	6500	3.4368	6602.58
3.4432	6675	3.4432	6565.57
3.4496	6584	3.4496	6529.07
3.456	6446	3.456	6492.69
3.4624	6432	3.4624	6456.65
3.4688	6281	3.4688	6420.74
3.4752	6318	3.4752	6385.04
3.4816	6334	3.4816	6349.59
3.488	6262	3.488	6314.48
3.4944	6210	3.4944	6279.59
3.5008	6261	3.5008	6244.79
3.5072	6262	3.5072	6210.34
3.5136	6224	3.5136	6176.06
3.52	6086	3.52	6142.04
3.5264	6011	3.5264	6108.24
3.5328	6032	3.5328	6074.59
3.5392	6099	3.5392	6041.3
3.5456	5959	3.5456	6008.08
3.552	5980	3.552	5975.13
3.5584	5816	3.5584	5942.41
3.5648	5795	3.5648	5909.9
3.5712	5999	3.5712	5877.61
3.5776	5921	3.5776	5845.46
3.584	5784	3.584	5813.58
3.5904	5719	3.5904	5781.93
3.5968	5705	3.5968	5750.47
3.6032	5851	3.6032	5719.17
3.6096	5709	3.6096	5688.13
3.616	5709	3.616	5657.26
3.6224	5637	3.6224	5626.57
3.6288	5649	3.6288	5596.08
3.6352	5525	3.6352	5565.83
3.6416	5501	3.6416	5535.74
3.648	5472	3.648	5505.82
3.6544	5492	3.6544	5476.09
3.6608	5480	3.6608	5446.58
3.6672	5364	3.6672	5417.23
3.6736	5380	3.6736	5388.06
3.68	5382	3.68	5359.27
3.6864	5213	3.6864	5330.45
3.6928	5143	3.6928	5301.82
3.6992	5242	3.6992	5273.31
3.7056	5221	3.7056	5245.1
3.712	5290	3.712	5217.17
3.7184	5149	3.7184	5189.2
3.7248	5151	3.7248	5161.53
3.7312	5098	3.7312	5134.11
3.7376	4964	3.7376	5106.67
3.744	5038	3.744	5079.47
3.7504	5010	3.7504	5052.67
3.7568	5140	3.7568	5025.67
3.7632	4888	3.7632	4998.96
3.7696	5035	3.7696	4972.63
3.776	5017	3.776	4946.13
3.7824	4984	3.7824	4920.14
3.7888	4765	3.7888	4894.06
3.7952	4769	3.7952	4868.34
3.8016	4797	3.8016	4842.56
3.808	4849	3.808	4817.19
3.8144	4657	3.8144	4791.57
3.8208	4778	3.8208	4766.6
3.8272	4681	3.8272	4741.28
3.8336	4607	3.8336	4716.59
3.84	4755	3.84	4691.68
3.8464	4577	3.8464	4667.17
3.8528	4681	3.8528	4642.84
3.8592	4626	3.8592	4618.38
3.8656	4535	3.8656	4594.39
3.872	4549	3.872	4570.56
3.8784	4512	3.8784	4546.42
3.8848	4418	3.8848	4522.9
3.8912	4435	3.8912	4499.4
3.8976	4416	3.8976	4475.7
3.904	4412	3.904	4452.62
3.9104	4490	3.9104	4429.69
3.9168	4440	3.9168	4406.65
3.9232	4420	3.9232	4383.93
3.9296	4320	3.9296	4360.94
3.936	4390	3.936	4338.33
3.9424	4323	3.9424	4316.16
3.9488	4416	3.9488	4293.86
3.9552	4213	3.9552	4271.72
3.9616	4294	3.9616	4249.8
3.968	4267	3.968	4227.92
3.9744	4100	3.9744	4205.94
3.9808	4198	3.9808	4184.44
3.9872	4153	3.9872	4162.99
3.9936	4183	3.9936	4141.94
4	4097	4	4120.38
4.0064	4052	4.0064	4099.46
4.0128	4012	4.0128	4078.56
4.0192	4133	4.0192	4057.57
4.0256	4032	4.0256	4036.94
4.032	3939	4.032	4016.46
4.0384	3960	4.0384	3995.93
4.0448	3967	4.0448	3975.67
4.0512	3945	4.0512	3955.41
4.0576	3991	4.0576	3935.35
4.064	3897	4.064	3915.29
4.0704	3954	4.0704	3895.62
4.0768	3917	4.0768	3875.79
4.0832	3808	4.0832	3856.22
4.0896	3786	4.0896	3836.75
4.096	3814	4.096	3817.26
4.1024	3771	4.1024	3798.03
4.1088	3677	4.1088	3778.99
4.1152	3690	4.1152	3759.98
4.1216	3701	4.1216	3741.05
4.128	3626	4.128	3722.22
4.1344	3616	4.1344	3703.5
4.1408	3603	4.1408	3684.94
4.1472	3678	4.1472	3666.43
4.1536	3674	4.1536	3648.02
4.16	3612	4.16	3629.84
4.1664	3558	4.1664	3611.64
4.1728	3552	4.1728	3593.71
4.1792	3484	4.1792	3575.72
4.1856	3524	4.1856	3557.95
4.192	3418	4.192	3540.16
4.1984	3481	4.1984	3522.6
4.2048	3562	4.2048	3505.09
4.2112	3520	4.2112	3487.73
4.2176	3307	4.2176	3470.34
4.224	3390	4.224	3453.19
4.2304	3374	4.2304	3436.11
4.2368	3459	4.2368	3419.15
4.2432	3403	4.2432	3402.16
4.2496	3334	4.2496	3385.46
4.256	3417	4.256	3368.62
4.2624	3454	4.2624	3352.11
4.2688	3339	4.2688	3335.51
4.2752	3327	4.2752	3319.19
4.2816	3316	4.2816	3302.82
4.288	3281	4.288	3286.68
4.2944	3272	4.2944	3270.47
4.3008	3280	4.3008	3254.51
4.3072	3217	4.3072	3238.51
4.3136	3163	4.3136	3222.74
4.32	3277	4.32	3206.86
4.3264	3182	4.3264	3191.28
4.3328	3089	4.3328	3175.65
4.3392	3168	4.3392	3160.25
4.3456	3078	4.3456	3144.73
4.352	3094	4.352	3129.51
4.3584	3118	4.3584	3114.23
4.3648	3114	4.3648	3099.19
4.3712	3066	4.3712	3084.18
4.3776	3020	4.3776	3069.16
4.384	3170	4.384	3054.38
4.3904	3005	4.3904	3039.48
4.3968	3013	4.3968	3024.87
4.4032	2965	4.4032	3010.19
4.4096	3036	4.4096	2995.74
4.416	2908	4.416	2981.28
4.4224	2935	4.4224	2966.92
4.4288	2932	4.4288	2952.66
4.4352	2905	4.4352	2938.41
4.4416	2873	4.4416	2924.24
4.448	2888	4.448	2910.25
4.4544	2792	4.4544	2896.38
4.4608	2794	4.4608	2882.45
4.4672	2918	4.4672	2868.58
4.4736	2808	4.4736	2854.91
4.48	2784	4.48	2841.36
4.4864	2793	4.4864	2827.72
4.4928	2775	4.4928	2814.2
4.4992	2676	4.4992	2800.71
4.5056	2840	4.5056	2787.54
4.512	2765	4.512	2774.26
4.5184	2729	4.5184	2761.12
4.5248	2818	4.5248	2747.94
4.5312	2696	4.5312	2734.84
4.5376	2662	4.5376	2722.03
4.544	2779	4.544	2709.08
4.5504	2694	4.5504	2696.29
4.5568	2618	4.5568	2683.48
4.5632	2755	4.5632	2670.85
4.5696	2713	4.5696	2658.23
4.576	2636	4.576	2645.8
4.5824	2571	4.5824	2633.28
4.5888	2579	4.5888	2620.9
4.5952	2640	4.5952	2608.46
4.6016	2648	4.6016	2596.33
4.608	2540	4.608	2584.08
4.6144	2542	4.6144	2571.99
4.6208	2541	4.6208	2560.02
4.6272	2464	4.6272	2547.93
4.6336	2452	4.6336	2536.11
4.64	2627	4.64	2524.25
4.6464	2389	4.6464	2512.36
4.6528	2504	4.6528	2500.69
4.6592	2488	4.6592	2489.12
4.6656	2524	4.6656	2477.66
4.672	2537	4.672	2466.16
4.6784	2546	4.6784	2454.45
4.6848	2489	4.6848	2443.12
4.6912	2496	4.6912	2431.87
4.6976	2376	4.6976	2420.59
4.704	2428	4.704	2409.48
4.7104	2383	4.7104	2398.34
4.7168	2302	4.7168	2386.98
4.7232	2354	4.7232	2376.13
4.7296	2380	4.7296	2365.16
4.736	2268	4.736	2354.38
4.7424	2386	4.7424	2343.4
4.7488	2265	4.7488	2332.66
4.7552	2271	4.7552	2321.97
4.7616	2248	4.7616	2311.33
4.768	2320	4.768	2300.66
4.7744	2252	4.7744	2290.21
4.7808	2239	4.7808	2279.74
4.7872	2238	4.7872	2269.24
4.7936	2188	4.7936	2258.95
4.8	2219	4.8	2248.63
4.8064	2201	4.8064	2238.37
4.8128	2303	4.8128	2228.16
4.8192	2225	4.8192	2218.01
4.8256	2215	4.8256	2207.97
4.832	2146	4.832	2197.92
4.8384	2286	4.8384	2187.86
4.8448	2141	4.8448	2178.07
4.8512	2136	4.8512	2168.18
4.8576	2186	4.8576	2158.33
4.864	2131	4.864	2148.6
4.8704	2159	4.8704	2138.86
4.8768	2000	4.8768	2129.23
4.8832	2137	4.8832	2119.59
4.8896	2144	4.8896	2110.03
4.896	1991	4.896	2100.6
4.9024	2082	4.9024	2091.16
4.9088	2112	4.9088	2081.77
4.9152	2038	4.9152	2072.39
4.9216	2070	4.9216	2063.12
4.928	2068	4.928	2053.88
4.9344	2017	4.9344	2044.68
4.9408	2028	4.9408	2035.54
4.9472	2099	4.9472	2026.46
4.9536	1964	4.9536	2017.45
4.96	1966	4.96	2008.4
4.9664	2031	4.9664	1999.45
4.9728	1996	4.9728	1990.56
4.9792	2022	4.9792	1981.73
4.9856	2004	4.9856	1972.88
4.992	2019	4.992	1964.16
4.9984	1970	4.9984	1955.44
5.0048	2019	5.0048	1946.77
5.0112	1946	5.0112	1938.16
5.0176	1938	5.0176	1929.59
5.024	1955	5.024	1921.05
5.0304	1820	5.0304	1912.6
5.0368	1885	5.0368	1904.17
5.0432	1763	5.0432	1895.78
5.0496	1848	5.0496	1887.44
5.056	1830	5.056	1879.13
5.0624	1854	5.0624	1870.88
5.0688	1828	5.0688	1862.66
5.0752	1826	5.0752	1854.51
5.0816	1897	5.0816	1846.38
5.088	1873	5.088	1838.32
5.0944	1795	5.0944	1830.27
5.1008	1851	5.1008	1822.27
5.1072	1851	5.1072	1814.32
5.1136	1787	5.1136	1806.4
5.12	1764	5.12	1798.54
5.1264	1814	5.1264	1790.71
5.1328	1789	5.1328	1782.94
5.1392	1836	5.1392	1775.21
5.1456	1826	5.1456	1767.48
5.152	1740	5.152	1759.83
5.1584	1674	5.1584	1752.2
5.1648	1814	5.1648	1744.63
5.1712	1661	5.1712	1737.08
5.1776	1806	5.1776	1729.57
5.184	1691	5.184	1722.11
5.1904	1741	5.1904	1714.71
5.1968	1667	5.1968	1707.33
5.2032	1610	5.2032	1699.98
5.2096	1691	5.2096	1692.66
5.216	1689	5.216	1685.39
5.2224	1678	5.2224	1678.14
5.2288	1709	5.2288	1671
5.2352	1704	5.2352	1663.82
5.2416	1657	5.2416	1656.69
5.248	1610	5.248	1649.6
5.2544	1606	5.2544	1642.6
5.2608	1642	5.2608	1635.57
5.2672	1636	5.2672	1628.58
5.2736	1681	5.2736	1621.69
5.28	1648	5.28	1614.78
5.2864	1574	5.2864	1607.96
5.2928	1668	5.2928	1601.09
5.2992	1616	5.2992	1594.29
5.3056	1580	5.3056	1587.57
5.312	1565	5.312	1580.8
5.3184	1512	5.3184	1574.18
5.3248	1558	5.3248	1567.49
5.3312	1535	5.3312	1560.91
5.3376	1572	5.3376	1554.28
5.344	1570	5.344	1547.78
5.3504	1557	5.3504	1541.23
5.3568	1527	5.3568	1534.77
5.3632	1617	5.3632	1528.29
5.3696	1490	5.3696	1521.91
5.376	1561	5.376	1515.56
5.3824	1487	5.3824	1509.16
5.3888	1495	5.3888	1502.88
5.3952	1498	5.3952	1496.64
5.4016	1576	5.4016	1490.3
5.408	1501	5.408	1484.13
5.4144	1529	5.4144	1477.96
5.4208	1466	5.4208	1471.72
5.4272	1421	5.4272	1465.62
5.4336	1466	5.4336	1459.59
5.44	1412	5.44	1453.52
5.4464	1432	5.4464	1447.52
5.4528	1475	5.4528	1441.44
5.4592	1411	5.4592	1435.51
5.4656	1428	5.4656	1429.57
5.472	1473	5.472	1423.66
5.4784	1434	5.4784	1417.83
5.4848	1437	5.4848	1411.99
5.4912	1431	5.4912	1406.19
5.4976	1410	5.4976	1400.39
5.504	1397	5.504	1394.61
5.5104	1429	5.5104	1388.86
5.5168	1327	5.5168	1383.17
5.5232	1390	5.5232	1377.51
5.5296	1397	5.5296	1371.88
5.536	1428	5.536	1366.23
5.5424	1377	5.5424	1360.7
5.5488	1395	5.5488	1355.14
5.5552	1358	5.5552	1349.57
5.5616	1299	5.5616	1344.11
5.568	1334	5.568	1338.61
5.5744	1290	5.5744	1333.19
5.5808	1335	5.5808	1327.77
5.5872	1385	5.5872	1322.41
5.5936	1290	5.5936	1317.01
5.6	1289	5.6	1311.7
5.6064	1312	5.6064	1306.37
5.6128	1333	5.6128	1301.08
5.6192	1297	5.6192	1295.84
5.6256	1265	5.6256	1290.64
5.632	1224	5.632	1285.42
5.6384	1285	5.6384	1280.22
5.6448	1378	5.6448	1275.11
5.6512	1311	5.6512	1269.98
5.6576	1308	5.6576	1264.89
5.664	1291	5.664	1259.79
5.6704	1280	5.6704	1254.77
5.6768	1282	5.6768	1249.74
5.6832	1255	5.6832	1244.75
5.6896	1235	5.6896	1239.75
5.696	1213	5.696	1234.82
5.7024	1205	5.7024	1229.89
5.7088	1180	5.7088	1225.01
5.7152	1239	5.7152	1220.12
5.7216	1262	5.7216	1215.29
5.728	1248	5.728	1210.46
5.7344	1214	5.7344	1205.65
5.7408	1154	5.7408	1200.88
5.7472	1239	5.7472	1196.14
5.7536	1186	5.7536	1191.41
5.76	1205	5.76	1186.67
5.7664	1221	5.7664	1182.02
5.7728	1165	5.7728	1177.36
5.7792	1097	5.7792	1172.71
5.7856	1156	5.7856	1168.12
5.792	1227	5.792	1163.51
5.7984	1212	5.7984	1158.94
5.8048	1151	5.8048	1154.41
5.8112	1148	5.8112	1149.88
5.8176	1151	5.8176	1145.37
5.824	1167	5.824	1140.88
5.8304	1160	5.8304	1136.45
5.8368	1078	5.8368	1132
5.8432	1104	5.8432	1127.58
5.8496	1126	5.8496	1123.2
5.856	1119	5.856	1118.83
5.8624	1141	5.8624	1114.47
5.8688	1086	5.8688	1110.17
5.8752	1121	5.8752	1105.85
5.8816	1109	5.8816	1101.56
5.888	1118	5.888	1097.31
5.8944	1112	5.8944	1093.06
5.9008	1113	5.9008	1088.83
5.9072	1074	5.9072	1084.65
5.9136	1083	5.9136	1080.45
5.92	1078	5.92	1076.28
5.9264	1041	5.9264	1072.16
5.9328	1076	5.9328	1068.03
5.9392	1026	5.9392	1063.96
5.9456	1072	5.9456	1059.86
5.952	1121	5.952	1055.79
5.9584	1078	5.9584	1051.77
5.9648	1058	5.9648	1047.75
5.9712	1065	5.9712	1043.72
5.9776	1003	5.9776	1039.76
5.984	1054	5.984	1035.78
5.9904	1079	5.9904	1031.82
5.9968	998	5.9968	1027.94
6.0032	983	6.0032	1024.02
6.0096	1049	6.0096	1020.14
6.016	991	6.016	1016.25
6.0224	1021	6.0224	1012.4
6.0288	1068	6.0288	1008.59
6.0352	994	6.0352	1004.74
6.0416	1000	6.0416	1001
6.048	1015	6.048	997.203
6.0544	973	6.0544	993.44
6.0608	1009	6.0608	989.715
6.0672	999	6.0672	985.972
6.0736	1032	6.0736	982.303
6.08	998	6.08	978.586
6.0864	968	6.0864	974.906
6.0928	931	6.0928	971.273
6.0992	975	6.0992	967.632
6.1056	963	6.1056	964.035
6.112	909	6.112	960.417
6.1184	974	6.1184	956.806
6.1248	981	6.1248	953.293
6.1312	1010	6.1312	949.745
6.1376	951	6.1376	946.207
6.144	996	6.144	942.697
6.1504	943	6.1504	939.242
6.1568	899	6.1568	935.704
6.1632	928	6.1632	932.231
6.1696	976	6.1696	928.831
6.176	909	6.176	925.343
6.1824	882	6.1824	921.961
6.1888	876	6.1888	918.541
6.1952	971	6.1952	915.234
6.2016	865	6.2016	911.773
6.208	919	6.208	908.462
6.2144	926	6.2144	905.131
6.2208	934	6.2208	901.857
6.2272	898	6.2272	898.521
6.2336	907	6.2336	895.201
6.24	886	6.24	891.916
6.2464	884	6.2464	888.649
6.2528	907	6.2528	885.44
6.2592	855	6.2592	882.19
6.2656	864	6.2656	879.018
6.272	886	6.272	875.797
6.2784	905	6.2784	872.631
6.2848	877	6.2848	869.437
6.2912	928	6.2912	866.321
6.2976	913	6.2976	863.155
6.304	782	6.304	860.069
6.3104	890	6.3104	856.95
6.3168	871	6.3168	853.872
6.3232	817	6.3232	850.779
6.3296	892	6.3296	847.725
6.336	870	6.336	844.641
6.3424	869	6.3424	841.655
6.3488	827	6.3488	838.579
6.3552	849	6.3552	835.62
6.3616	856	6.3616	832.588
6.368	828	6.368	829.64
6.3744	836	6.3744	826.651
6.3808	821	6.3808	823.73
6.3872	815	6.3872	820.752
6.3936	824	6.3936	817.864
6.4	834	6.4	814.911
6.4064	813	6.4064	812.044
6.4128	830	6.4128	809.131
6.4192	825	6.4192	806.267
6.4256	833	6.4256	803.38
6.432	783	6.432	800.592
6.4384	778	6.4384	797.792
6.4448	791	6.4448	794.917
6.4512	769	6.4512	792.156
6.4576	823	6.4576	789.33
6.464	832	6.464	786.569
6.4704	783	6.4704	783.758
6.4768	781	6.4768	781.048
6.4832	750	6.4832	778.246
6.4896	763	6.4896	775.555
6.496	777	6.496	772.819
6.5024	794	6.5024	770.154
6.5088	755	6.5088	767.433
6.5152	763	6.5152	764.766
6.5216	745	6.5216	762.077
6.528	802	6.528	759.451
6.5344	813	6.5344	756.793
6.5408	779	6.5408	754.171
6.5472	731	6.5472	751.53
6.5536	748	6.5536	748.956
6.56	753	6.56	746.363
6.5664	795	6.5664	743.762
6.5728	794	6.5728	741.192
6.5792	756	6.5792	738.618
6.5856	732	6.5856	736.095
6.592	696	6.592	733.536
6.5984	704	6.5984	731.018
6.6048	729	6.6048	728.509
6.6112	785	6.6112	725.985
6.6176	755	6.6176	723.52
6.624	746	6.624	721.044
6.6304	718	6.6304	718.556
6.6368	730	6.6368	716.101
6.6432	696	6.6432	713.634
6.6496	718	6.6496	711.201
6.656	733	6.656	708.801
6.6624	764	6.6624	706.389
6.6688	742	6.6688	703.967
6.6752	687	6.6752	701.576
6.6816	713	6.6816	699.196
6.688	689	6.688	696.805
6.6944	691	6.6944	694.473
6.7008	714	6.7008	692.125
6.7072	748	6.7072	689.785
6.7136	706	6.7136	687.458
6.72	726	6.72	685.118
6.7264	670	6.7264	682.811
6.7328	699	6.7328	680.512
6.7392	717	6.7392	678.231
6.7456	707	6.7456	675.973
6.752	704	6.752	673.704
6.7584	616	6.7584	671.425
6.7648	657	6.7648	669.173
6.7712	733	6.7712	666.946
6.7776	684	6.7776	664.713
6.784	690	6.784	662.49
6.7904	682	6.7904	660.294
6.7968	653	6.7968	658.091
6.8032	669	6.8032	655.88
6.8096	653	6.8096	653.747
6.816	651	6.816	651.567
6.8224	656	6.8224	649.401
6.8288	692	6.8288	647.24
6.8352	657	6.8352	645.089
6.8416	668	6.8416	642.971
6.848	655	6.848	640.839
6.8544	626	6.8544	638.735
6.8608	637	6.8608	636.621
6.8672	615	6.8672	634.536
6.8736	660	6.8736	632.435
6.88	658	6.88	630.37
6.8864	616	6.8864	628.308
6.8928	664	6.8928	626.233
6.8992	635	6.8992	624.206
6.9056	635	6.9056	622.149
6.912	626	6.912	620.125
6.9184	632	6.9184	618.111
6.9248	686	6.9248	616.081
6.9312	623	6.9312	614.077
6.9376	574	6.9376	612.091
6.944	617	6.944	610.106
6.9504	594	6.9504	608.102
6.9568	600	6.9568	606.159
6.9632	611	6.9632	604.201
6.9696	578	6.9696	602.243
6.976	562	6.976	600.274
6.9824	656	6.9824	598.343
6.9888	610	6.9888	596.412
6.9952	618	6.9952	594.513
7.0016	586	7.0016	592.599
7.008	590	7.008	590.694
7.0144	589	7.0144	588.798
7.0208	571	7.0208	586.924
7.0272	607	7.0272	585.032
7.0336	574	7.0336	583.162
7.04	562	7.04	581.312
7.0464	577	7.0464	579.446
7.0528	575	7.0528	577.598
7.0592	581	7.0592	575.746
7.0656	569	7.0656	573.935
7.072	554	7.072	572.099
7.0784	568	7.0784	570.281
7.0848	602	7.0848	568.471
7.0912	569	7.0912	566.677
7.0976	593	7.0976	564.871
7.104	530	7.104	563.101
7.1104	542	7.1104	561.319
7.1168	584	7.1168	559.563
7.1232	562	7.1232	557.785
7.1296	638	7.1296	556.032
7.136	514	7.136	554.289
7.1424	550	7.1424	552.542
7.1488	588	7.1488	550.82
7.1552	542	7.1552	549.088
7.1616	549	7.1616	547.372
7.168	520	7.168	545.66
7.1744	546	7.1744	543.947
7.1808	513	7.1808	542.258
7.1872	553	7.1872	540.57
7.1936	537	7.1936	538.886
7.2	542	7.2	537.217
7.2064	545	7.2064	535.541
7.2128	553	7.2128	533.877
7.2192	541	7.2192	532.22
7.2256	525	7.2256	530.578
7.232	553	7.232	528.934
7.2384	522	7.2384	527.31
7.2448	525	7.2448	525.672
7.2512	473	7.2512	524.056
7.2576	544	7.2576	522.441
7.264	524	7.264	520.835
7.2704	524	7.2704	519.242
7.2768	524	7.2768	517.638
7.2832	570	7.2832	516.054
7.2896	490	7.2896	514.476
7.296	536	7.296	512.902
7.3024	479	7.3024	511.336
7.3088	536	7.3088	509.775
7.3152	505	7.3152	508.217
7.3216	548	7.3216	506.673
7.328	521	7.328	505.133
7.3344	517	7.3344	503.598
7.3408	554	7.3408	502.066
7.3472	485	7.3472	500.545
7.3536	491	7.3536	499.033
7.36	530	7.36	497.52
7.3664	468	7.3664	496.014
7.3728	496	7.3728	494.519
7.3792	520	7.3792	493.025
7.3856	496	7.3856	491.542
7.392	509	7.392	490.061
7.3984	482	7.3984	488.589
7.4048	509	7.4048	487.121
7.4112	508	7.4112	485.661
7.4176	505	7.4176	484.207
7.424	467	7.424	482.756
7.4304	435	7.4304	481.312
7.4368	434	7.4368	479.875
7.4432	505	7.4432	478.442
7.4496	489	7.4496	477.017
7.456	457	7.456	475.598
7.4624	480	7.4624	474.182
7.4688	472	7.4688	472.774
7.4752	498	7.4752	471.375
7.4816	484	7.4816	469.977
7.488	462	7.488	468.585
7.4944	484	7.4944	467.198
7.5008	485	7.5008	465.816
7.5072	513	7.5072	464.441
7.5136	485	7.5136	463.075
7.52	495	7.52	461.711
7.5264	493	7.5264	460.35
7.5328	493	7.5328	458.996
7.5392	455	7.5392	457.654
7.5456	473	7.5456	456.31
7.552	468	7.552	454.971
7.5584	428	7.5584	453.643
7.5648	416	7.5648	452.317
7.5712	427	7.5712	450.993
7.5776	448	7.5776	449.682
7.584	435	7.584	448.367
7.5904	479	7.5904	447.068
7.5968	434	7.5968	445.766
7.6032	441	7.6032	444.467
7.6096	491	7.6096	443.18
7.616	422	7.616	441.89
7.6224	490	7.6224	440.615
7.6288	474	7.6288	439.34
7.6352	463	7.6352	438.076
7.6416	457	7.6416	436.814
7.648	440	7.648	435.55
7.6544	422	7.6544	434.303
7.6608	455	7.6608	433.046
7.6672	412	7.6672	431.803
7.6736	440	7.6736	430.567
7.68	446	7.68	429.33
7.6864	434	7.6864	428.105
7.6928	440	7.6928	426.881
7.6992	445	7.6992	425.651
7.7056	444	7.7056	424.443
7.712	433	7.712	423.234
7.7184	452	7.7184	422.032
7.7248	422	7.7248	420.819
7.7312	395	7.7312	419.629
7.7376	404	7.7376	418.44
7.744	443	7.744	417.253
7.7504	408	7.7504	416.066
7.7568	410	7.7568	414.904
7.7632	413	7.7632	413.711
7.7696	393	7.7696	412.539
7.776	409	7.776	411.375
7.7824	388	7.7824	410.225
7.7888	399	7.7888	409.069
7.7952	426	7.7952	407.916
7.8016	416	7.8016	406.781
7.808	430	7.808	405.64
7.8144	417	7.8144	404.494
7.8208	399	7.8208	403.357
7.8272	407	7.8272	402.239
7.8336	381	7.8336	401.106
7.84	416	7.84	399.986
7.8464	385	7.8464	398.882
7.8528	414	7.8528	397.765
7.8592	392	7.8592	396.653
7.8656	412	7.8656	395.548
7.872	391	7.872	394.461
7.8784	374	7.8784	393.356
7.8848	383	7.8848	392.268
7.8912	425	7.8912	391.19
7.8976	388	7.8976	390.101
7.904	384	7.904	389.02
7.9104	387	7.9104	387.958
7.9168	380	7.9168	386.885
7.9232	373	7.9232	385.812
7.9296	380	7.9296	384.762
7.936	363	7.936	383.7
7.9424	410	7.9424	382.639
7.9488	379	7.9488	381.606
7.9552	370	7.9552	380.553
7.9616	395	7.9616	379.506
7.968	416	7.968	378.48
7.9744	373	7.9744	377.441
7.9808	359	7.9808	376.406
7.9872	413	7.9872	375.392
7.9936	397	7.9936	374.364
8	375	8	373.339
8.0064	345	8.0064	372.337
8.0128	340	8.0128	371.323
8.0192	367	8.0192	370.309
8.0256	358	8.0256	369.319
8.032	359	8.032	368.313
8.0384	357	8.0384	367.331
8.0448	348	8.0448	366.327
8.0512	365	8.0512	365.333
8.0576	352	8.0576	364.363
8.064	407	8.064	363.376
8.0704	364	8.0704	362.392
8.0768	353	8.0768	361.434
8.0832	364	8.0832	360.45
8.0896	373	8.0896	359.5
8.096	362	8.096	358.532
8.1024	361	8.1024	357.559
8.1088	370	8.1088	356.619
8.1152	343	8.1152	355.661
8.1216	337	8.1216	354.699
8.128	359	8.128	353.771
8.1344	316	8.1344	352.823
8.1408	325	8.1408	351.902
8.1472	398	8.1472	350.954
8.1536	368	8.1536	350.017
8.16	360	8.16	349.099
8.1664	353	8.1664	348.169
8.1728	354	8.1728	347.258
8.1792	349	8.1792	346.334
8.1856	320	8.1856	345.431
8.192	371	8.192	344.514
8.1984	346	8.1984	343.592
8.2048	348	8.2048	342.708
8.2112	328	8.2112	341.793
8.2176	337	8.2176	340.915
8.224	361	8.224	340.006
8.2304	363	8.2304	339.136
8.2368	360	8.2368	338.233
8.2432	381	8.2432	337.333
8.2496	352	8.2496	336.473
8.256	337	8.256	335.581
8.2624	340	8.2624	334.719
8.2688	331	8.2688	333.841
8.2752	309	8.2752	332.985
8.2816	331	8.2816	332.104
8.288	327	8.288	331.267
8.2944	341	8.2944	330.391
8.3008	346	8.3008	329.519
8.3072	316	8.3072	328.682
8.3136	305	8.3136	327.815
8.32	349	8.32	326.992
8.3264	332	8.3264	326.136
8.3328	310	8.3328	325.308
8.3392	314	8.3392	324.453
8.3456	344	8.3456	323.637
8.352	326	8.352	322.787
8.3584	366	8.3584	321.977
8.3648	303	8.3648	321.133
8.3712	301	8.3712	320.328
8.3776	350	8.3776	319.501
8.384	346	8.384	318.703
8.3904	338	8.3904	317.871
8.3968	341	8.3968	317.08
8.4032	315	8.4032	316.252
8.4096	301	8.4096	315.454
8.416	320	8.416	314.634
8.4224	298	8.4224	313.854
8.4288	279	8.4288	313.043
8.4352	320	8.4352	312.263
8.4416	308	8.4416	311.458
8.448	308	8.448	310.685
8.4544	308	8.4544	309.884
8.4608	304	8.4608	309.123
8.4672	339	8.4672	308.316
8.4736	290	8.4736	307.552
8.48	288	8.48	306.765
8.4864	304	8.4864	306.015
8.4928	307	8.4928	305.229
8.4992	321	8.4992	304.472
8.5056	319	8.5056	303.687
8.512	281	8.512	302.949
8.5184	331	8.5184	302.199
8.5248	278	8.5248	301.427
8.5312	328	8.5312	300.696
8.5376	286	8.5376	299.919
8.544	262	8.544	299.195
8.5504	302	8.5504	298.431
8.5568	302	8.5568	297.696
8.5632	326	8.5632	296.952
8.5696	318	8.5696	296.219
8.576	284	8.576	295.475
8.5824	341	8.5824	294.758
8.5888	293	8.5888	294.019
8.5952	292	8.5952	293.295
8.6016	342	8.6016	292.559
8.608	299	8.608	291.855
8.6144	299	8.6144	291.123
8.6208	288	8.6208	290.411
8.6272	304	8.6272	289.689
8.6336	288	8.6336	288.989
8.64	296	8.64	288.27
8.6464	314	8.6464	287.567
8.6528	293	8.6528	286.851
8.6592	282	8.6592	286.153
8.6656	300	8.6656	285.466
8.672	290	8.672	284.758
8.6784	317	8.6784	284.066
8.6848	292	8.6848	283.364
8.6912	276	8.6912	282.675
8.6976	288	8.6976	281.999
8.704	272	8.704	281.315
8.7104	293	8.7104	280.623
8.7168	289	8.7168	279.944
8.7232	259	8.7232	279.255
8.7296	267	8.7296	278.579
8.736	258	8.736	277.918
8.7424	255	8.7424	277.247
8.7488	295	8.7488	276.568
8.7552	258	8.7552	275.902
8.7616	276	8.7616	275.238
8.768	283	8.768	274.566
8.7744	295	8.7744	273.916
8.7808	251	8.7808	273.258
8.7872	296	8.7872	272.603
8.7936	295	8.7936	271.95
8.8	282	8.8	271.288
8.8064	281	8.8064	270.639
8.8128	273	8.8128	269.993
8.8192	270	8.8192	269.348
8.8256	275	8.8256	268.715
8.832	247	8.832	268.075
8.8384	245	8.8384	267.435
8.8448	282	8.8448	266.79
8.8512	229	8.8512	266.155
8.8576	252	8.8576	265.523
8.864	283	8.864	264.893
8.8704	267	8.8704	264.264
8.8768	262	8.8768	263.638
8.8832	255	8.8832	263.014
8.8896	283	8.8896	262.392
8.896	253	8.896	261.763
8.9024	262	8.9024	261.163
8.9088	261	8.9088	260.547
8.9152	288	8.9152	259.932
8.9216	241	8.9216	259.32
8.928	241	8.928	258.71
8.9344	264	8.9344	258.102
8.9408	269	8.9408	257.495
8.9472	255	8.9472	256.891
8.9536	275	8.9536	256.289
8.96	234	8.96	255.688
8.9664	260	8.9664	255.09
8.9728	272	8.9728	254.493
8.9792	248	8.9792	253.899
8.9856	240	8.9856	253.306
8.992	245	8.992	252.715
8.9984	248	8.9984	252.126
9.0048	253	9.0048	251.539
9.0112	235	9.0112	250.954
9.0176	250	9.0176	250.37
9.024	242	9.024	249.796
9.0304	274	9.0304	249.218
9.0368	262	9.0368	248.639
9.0432	290	9.0432	248.063
9.0496	258	9.0496	247.489
9.056	232	9.056	246.918
9.0624	243	9.0624	246.354
9.0688	243	9.0688	245.785
9.0752	251	9.0752	245.219
9.0816	251	9.0816	244.654
9.088	227	9.088	244.097
9.0944	235	9.0944	243.536
9.1008	226	9.1008	242.976
9.1072	259	9.1072	242.418
9.1136	222	9.1136	241.869
9.12	220	9.12	241.308
9.1264	222	9.1264	240.756
9.1328	228	9.1328	240.205
9.1392	267	9.1392	239.663
9.1456	266	9.1456	239.115
9.152	257	9.152	238.57
9.1584	275	9.1584	238.031
9.1648	242	9.1648	237.49
9.1712	228	9.1712	236.954
9.1776	233	9.1776	236.417
9.184	236	9.184	235.878
9.1904	257	9.1904	235.344
9.1968	224	9.1968	234.811
9.2032	257	9.2032	234.278
9.2096	231	9.2096	233.753
9.216	246	9.216	233.226
9.2224	244	9.2224	232.702
9.2288	231	9.2288	232.177
9.2352	240	9.2352	231.659
9.2416	219	9.2416	231.133
9.248	238	9.248	230.616
9.2544	242	9.2544	230.097
9.2608	238	9.2608	229.585
9.2672	252	9.2672	229.071
9.2736	211	9.2736	228.563
9.28	223	9.28	228.047
9.2864	214	9.2864	227.536
9.2928	202	9.2928	227.029
9.2992	232	9.2992	226.526
9.3056	215	9.3056	226.02
9.312	219	9.312	225.521
9.3184	237	9.3184	225.016
9.3248	225	9.3248	224.516
9.3312	209	9.3312	224.021
9.3376	205	9.3376	223.525
9.344	236	9.344	223.032
9.3504	217	9.3504	222.536
9.3568	197	9.3568	222.043
9.3632	228	9.3632	221.556
9.3696	242	9.3696	221.068
9.376	229	9.376	220.577
9.3824	223	9.3824	220.093
9.3888	229	9.3888	219.61
9.3952	221	9.3952	219.126
9.4016	206	9.4016	218.644
9.408	217	9.408	218.166
9.4144	226	9.4144	217.687
9.4208	213	9.4208	217.211
9.4272	224	9.4272	216.734
9.4336	219	9.4336	216.263
9.44	210	9.44	215.789
9.4464	211	9.4464	215.319
9.4528	229	9.4528	214.848
9.4592	197	9.4592	214.382
9.4656	230	9.4656	213.916
9.472	201	9.472	213.449
9.4784	184	9.4784	212.985
9.4848	193	9.4848	212.524
9.4912	238	9.4912	212.064
9.4976	246	9.4976	211.604
9.504	213	9.504	211.146
9.5104	234	9.5104	210.689
9.5168	219	9.5168	210.234
9.5232	206	9.5232	209.78
9.5296	231	9.5296	209.328
9.536	222	9.536	208.877
9.5424	200	9.5424	208.428
9.5488	191	9.5488	207.979
9.5552	178	9.5552	207.532
9.5616	214	9.5616	207.087
9.568	205	9.568	206.643
9.5744	185	9.5744	206.199
9.5808	234	9.5808	205.758
9.5872	225	9.5872	205.318
9.5936	205	9.5936	204.879
9.6	208	9.6	204.441
9.6064	205	9.6064	204.005
9.6128	188	9.6128	203.57
9.6192	203	9.6192	203.136
9.6256	199	9.6256	202.704
9.632	193	9.632	202.273
9.6384	205	9.6384	201.843
9.6448	195	9.6448	201.415
9.6512	189	9.6512	200.987
9.6576	208	9.6576	200.562
9.664	190	9.664	200.138
9.6704	192	9.6704	199.714
9.6768	206	9.6768	199.292
9.6832	188	9.6832	198.872
9.6896	176	9.6896	198.452
9.696	184	9.696	198.034
9.7024	194	9.7024	197.616
9.7088	189	9.7088	197.199
9.7152	175	9.7152	196.787
9.7216	209	9.7216	196.374
9.728	200	9.728	195.96
9.7344	193	9.7344	195.549
9.7408	180	9.7408	195.141
9.7472	210	9.7472	194.732
9.7536	194	9.7536	194.325
9.76	180	9.76	193.918
9.7664	198	9.7664	193.516
9.7728	196	9.7728	193.111
9.7792	179	9.7792	192.708
9.7856	172	9.7856	192.305
9.792	191	9.792	191.908
9.7984	167	9.7984	191.509
9.8048	181	9.8048	191.109
9.8112	201	9.8112	190.712
9.8176	176	9.8176	190.32
9.824	168	9.824	189.925
9.8304	167	9.8304	189.531
9.8368	184	9.8368	189.136
9.8432	171	9.8432	188.749
9.8496	196	9.8496	188.36
9.856	188	9.856	187.969
9.8624	192	9.8624	187.58
9.8688	175	9.8688	187.198
9.8752	198	9.8752	186.811
9.8816	187	9.8816	186.426
9.888	163	9.888	186.047
9.8944	154	9.8944	185.664
9.9008	177	9.9008	185.28
9.9072	179	9.9072	184.901
9.9136	183	9.9136	184.525
9.92	195	9.92	184.148
9.9264	187	9.9264	183.768
9.9328	206	9.9328	183.397
9.9392	168	9.9392	183.022
9.9456	210	9.9456	182.647
9.952	179	9.952	182.28
9.9584	183	9.9584	181.908
9.9648	183	9.9648	181.536
9.9712	171	9.9712	181.172
9.9776	181	9.9776	180.8
9.984	183	9.984	180.432
9.9904	189	9.9904	180.063
9.9968	174	9.9968	179.705
10.0032	191	10.0032	179.339
10.0096	174	10.0096	178.974
10.016	201	10.016	178.618
10.0224	143	10.0224	178.255
10.0288	160	10.0288	177.891
10.0352	168	10.0352	177.541
10.0416	197	10.0416	177.181
10.048	151	10.048	176.82
10.0544	158	10.0544	176.473
10.0608	173	10.0608	176.116
10.0672	160	10.0672	175.769
10.0736	172	10.0736	175.414
10.08	162	10.08	175.059
10.0864	177	10.0864	174.715
10.0928	157	10.0928	174.362
10.0992	180	10.0992	174.008
10.1056	176	10.1056	173.671
10.112	169	10.112	173.318
10.1184	186	10.1184	172.969
10.1248	184	10.1248	172.632
10.1312	188	10.1312	172.285
10.1376	161	10.1376	171.95
10.144	178	10.144	171.606
10.1504	150	10.1504	171.259
10.1568	177	10.1568	170.927
10.1632	159	10.1632	170.585
10.1696	154	10.1696	170.24
10.176	173	10.176	169.912
10.1824	167	10.1824	169.573
10.1888	164	10.1888	169.247
10.1952	162	10.1952	168.906
10.2016	172	10.2016	168.57
10.208	172	10.208	168.247
10.2144	157	10.2144	167.908
10.2208	156	10.2208	167.587
10.2272	137	10.2272	167.255
10.2336	144	10.2336	166.919
10.24	166	10.24	166.601
10.2464	160	10.2464	166.268
10.2528	165	10.2528	165.951
10.2592	156	10.2592	165.62
10.2656	169	10.2656	165.293
10.272	162	10.272	164.975
10.2784	154	10.2784	164.651
10.2848	161	10.2848	164.335
10.2912	146	10.2912	164.012
10.2976	154	10.2976	163.698
10.304	173	10.304	163.373
10.3104	142	10.3104	163.052
10.3168	147	10.3168	162.742
10.3232	148	10.3232	162.423
10.3296	157	10.3296	162.114
10.336	161	10.336	161.793
10.3424	156	10.3424	161.491
10.3488	156	10.3488	161.171
10.3552	159	10.3552	160.866
10.3616	141	10.3616	160.548
10.368	173	10.368	160.25
10.3744	158	10.3744	159.934
10.3808	165	10.3808	159.618
10.3872	141	10.3872	159.318
10.3936	171	10.3936	159.009
10.4	134	10.4	158.711
10.4064	143	10.4064	158.399
10.4128	154	10.4128	158.102
10.4192	153	10.4192	157.792
10.4256	138	10.4256	157.497
10.432	158	10.432	157.188
10.4384	171	10.4384	156.896
10.4448	155	10.4448	156.588
10.4512	156	10.4512	156.303
10.4576	152	10.4576	155.997
10.464	136	10.464	155.708
10.4704	155	10.4704	155.404
10.4768	156	10.4768	155.117
10.4832	154	10.4832	154.809
10.4896	150	10.4896	154.524
10.496	174	10.496	154.222
10.5024	158	10.5024	153.939
10.5088	154	10.5088	153.639
10.5152	154	10.5152	153.358
10.5216	160	10.5216	153.06
10.528	153	10.528	152.78
10.5344	155	10.5344	152.484
10.5408	155	10.5408	152.2
10.5472	146	10.5472	151.905
10.5536	136	10.5536	151.629
10.56	149	10.56	151.335
10.5664	173	10.5664	151.061
10.5728	138	10.5728	150.763
10.5792	150	10.5792	150.491
10.5856	123	10.5856	150.2
10.592	126	10.592	149.923
10.5984	161	10.5984	149.653
10.6048	151	10.6048	149.365
10.6112	150	10.6112	149.09
10.6176	144	10.6176	148.804
10.624	120	10.624	148.538
10.6304	154	10.6304	148.246
10.6368	142	10.6368	147.983
10.6432	146	10.6432	147.703
10.6496	157	10.6496	147.424
10.656	156	10.656	147.152
10.6624	154	10.6624	146.887
10.6688	147	10.6688	146.61
10.6752	155	10.6752	146.334
10.6816	136	10.6816	146.064
10.688	148	10.688	145.802
10.6944	134	10.6944	145.527
10.7008	139	10.7008	145.26
10.7072	119	10.7072	144.988
10.7136	142	10.7136	144.728
10.72	151	10.72	144.456
10.7264	161	10.7264	144.191
10.7328	131	10.7328	143.922
10.7392	129	10.7392	143.659
10.7456	147	10.7456	143.401
10.752	120	10.752	143.134
10.7584	131	10.7584	142.872
10.7648	142	10.7648	142.606
10.7712	150	10.7712	142.346
10.7776	132	10.7776	142.092
10.784	127	10.784	141.828
10.7904	152	10.7904	141.57
10.7968	146	10.7968	141.312
10.8032	121	10.8032	141.05
10.8096	133	10.8096	140.793
10.816	132	10.816	140.543
10.8224	125	10.8224	140.288
10.8288	127	10.8288	140.029
10.8352	139	10.8352	139.775
10.8416	155	10.8416	139.522
10.848	130	10.848	139.265
10.8544	127	10.8544	139.013
10.8608	141	10.8608	138.767
10.8672	156	10.8672	138.516
10.8736	121	10.8736	138.267
10.88	130	10.88	138.012
10.8864	144	10.8864	137.764
10.8928	121	10.8928	137.516
10.8992	140	10.8992	137.268
10.9056	131	10.9056	137.021
10.912	149	10.912	136.78
10.9184	149	10.9184	136.535
10.9248	119	10.9248	136.285
10.9312	145	10.9312	136.041
10.9376	142	10.9376	135.797
10.944	122	10.944	135.554
10.9504	133	10.9504	135.311
10.9568	119	10.9568	135.069
10.9632	150	10.9632	134.828
10.9696	169	10.9696	134.587
10.976	143	10.976	134.347
10.9824	147	10.9824	134.108
10.9888	136	10.9888	133.869
10.9952	135	10.9952	133.635
11.0016	146	11.0016	133.397
11.008	148	11.008	133.16
11.0144	120	11.0144	132.923
11.0208	143	11.0208	132.687
11.0272	127	11.0272	132.452
11.0336	126	11.0336	132.217
11.04	116	11.04	131.983
11.0464	117	11.0464	131.749
11.0528	125	11.0528	131.516
11.0592	144	11.0592	131.284
11.0656	126	11.0656	131.052
11.072	131	11.072	130.821
11.0784	132	11.0784	130.59
11.0848	132	11.0848	130.364
11.0912	127	11.0912	130.134
11.0976	137	11.0976	129.905
11.104	114	11.104	129.677
11.1104	122	11.1104	129.449
11.1168	133	11.1168	129.221
11.1232	132	11.1232	128.995
11.1296	121	11.1296	128.772
11.136	143	11.136	128.547
11.1424	124	11.1424	128.321
11.1488	149	11.1488	128.097
11.1552	138	11.1552	127.876
11.1616	121	11.1616	127.653
11.168	115	11.168	127.43
11.1744	118	11.1744	127.205
11.1808	116	11.1808	126.983
11.1872	132	11.1872	126.765
11.1936	119	11.1936	126.545
11.2	116	11.2	126.325
11.2064	132	11.2064	126.108
11.2128	123	11.2128	125.889
11.2192	123	11.2192	125.671
11.2256	110	11.2256	125.456
11.232	132	11.232	125.239
11.2384	121	11.2384	125.022
11.2448	120	11.2448	124.809
11.2512	113	11.2512	124.593
11.2576	134	11.2576	124.375
11.264	125	11.264	124.163
11.2704	101	11.2704	123.949
11.2768	130	11.2768	123.738
11.2832	109	11.2832	123.526
11.2896	134	11.2896	123.313
11.296	133	11.296	123.104
11.3024	133	11.3024	122.892
11.3088	142	11.3088	122.681
11.3152	122	11.3152	122.471
11.3216	141	11.3216	122.264
11.328	118	11.328	122.055
11.3344	119	11.3344	121.848
11.3408	117	11.3408	121.64
11.3472	123	11.3472	121.432
11.3536	139	11.3536	121.225
11.36	116	11.36	121.02
11.3664	128	11.3664	120.815
11.3728	97	11.3728	120.611
11.3792	105	11.3792	120.408
11.3856	119	11.3856	120.201
11.392	118	11.392	119.999
11.3984	125	11.3984	119.796
11.4048	123	11.4048	119.595
11.4112	137	11.4112	119.392
11.4176	117	11.4176	119.19
11.424	127	11.424	118.99
11.4304	101	11.4304	118.789
11.4368	114	11.4368	118.59
11.4432	114	11.4432	118.392
11.4496	105	11.4496	118.191
11.456	118	11.456	117.994
11.4624	112	11.4624	117.797
11.4688	116	11.4688	117.599
11.4752	106	11.4752	117.402
11.4816	112	11.4816	117.206
11.488	103	11.488	117.009
11.4944	114	11.4944	116.815
11.5008	108	11.5008	116.619
11.5072	93	11.5072	116.426
11.5136	119	11.5136	116.231
11.52	101	11.52	116.037
11.5264	112	11.5264	115.845
11.5328	104	11.5328	115.653
11.5392	111	11.5392	115.462
11.5456	113	11.5456	115.269
11.552	101	11.552	115.078
11.5584	97	11.5584	114.888
11.5648	113	11.5648	114.697
11.5712	107	11.5712	114.508
11.5776	129	11.5776	114.32
11.584	104	11.584	114.131
11.5904	117	11.5904	113.942
11.5968	117	11.5968	113.755
11.6032	97	11.6032	113.567
11.6096	128	11.6096	113.38
11.616	124	11.616	113.194
11.6224	110	11.6224	113.009
11.6288	115	11.6288	112.823
11.6352	105	11.6352	112.638
11.6416	110	11.6416	112.454
11.648	124	11.648	112.27
11.6544	125	11.6544	112.086
11.6608	94	11.6608	111.903
11.6672	108	11.6672	111.72
11.6736	115	11.6736	111.538
11.68	125	11.68	111.356
11.6864	116	11.6864	111.175
11.6928	105	11.6928	110.994
11.6992	105	11.6992	110.813
11.7056	107	11.7056	110.633
11.712	102	11.712	110.454
11.7184	137	11.7184	110.275
11.7248	105	11.7248	110.096
11.7312	111	11.7312	109.917
11.7376	93	11.7376	109.739
11.744	116	11.744	109.563
11.7504	90	11.7504	109.386
11.7568	97	11.7568	109.209
11.7632	102	11.7632	109.033
11.7696	100	11.7696	108.858
11.776	134	11.776	108.682
11.7824	100	11.7824	108.507
11.7888	102	11.7888	108.333
11.7952	122	11.7952	108.158
11.8016	116	11.8016	107.986
11.808	102	11.808	107.813
11.8144	114	11.8144	107.64
11.8208	115	11.8208	107.467
11.8272	105	11.8272	107.297
11.8336	92	11.8336	107.124
11.84	100	11.84	106.953
11.8464	125	11.8464	106.782
11.8528	112	11.8528	106.614
11.8592	118	11.8592	106.443
11.8656	89	11.8656	106.273
11.872	113	11.872	106.104
11.8784	78	11.8784	105.937
11.8848	99	11.8848	105.768
11.8912	112	11.8912	105.6
11.8976	100	11.8976	105.432
11.904	110	11.904	105.267
11.9104	108	11.9104	105.099
11.9168	122	11.9168	104.933
11.9232	107	11.9232	104.766
11.9296	111	11.9296	104.603
11.936	95	11.936	104.437
11.9424	104	11.9424	104.272
11.9488	118	11.9488	104.11
11.9552	110	11.9552	103.946
11.9616	108	11.9616	103.781
11.968	91	11.968	103.617
11.9744	112	11.9744	103.457
11.9808	99	11.9808	103.295
11.9872	93	11.9872	103.132
11.9936	102	11.9936	102.973
12	105	12	102.811
12.0064	107	12.0064	102.649
12.0128	107	12.0128	102.492
12.0192	89	12.0192	102.331
12.0256	105	12.0256	102.17
12.032	100	12.032	102.009
12.0384	82	12.0384	101.854
12.0448	111	12.0448	101.694
12.0512	89	12.0512	101.535
12.0576	100	12.0576	101.38
12.064	91	12.064	101.221
12.0704	107	12.0704	101.063
12.0768	97	12.0768	100.91
12.0832	88	12.0832	100.753
12.0896	93	12.0896	100.596
12.096	99	12.096	100.443
12.1024	96	12.1024	100.287
12.1088	115	12.1088	100.13
12.1152	94	12.1152	99.9805
12.1216	105	12.1216	99.8238
12.128	106	12.128	99.6687
12.1344	102	12.1344	99.52
12.1408	89	12.1408	99.3658
12.1472	107	12.1472	99.2104
12.1536	106	12.1536	99.063
12.16	110	12.16	98.9082
12.1664	77	12.1664	98.7555
12.1728	100	12.1728	98.6077
12.1792	102	12.1792	98.4555
12.1856	84	12.1856	98.3087
12.192	115	12.192	98.1573
12.1984	100	12.1984	98.0063
12.2048	98	12.2048	97.8605
12.2112	100	12.2112	97.7086
12.2176	94	12.2176	97.5587
12.224	101	12.224	97.4142
12.2304	84	12.2304	97.2649
12.2368	111	12.2368	97.1213
12.2432	101	12.2432	96.9709
12.2496	109	12.2496	96.8228
12.256	83	12.256	96.6802
12.2624	98	12.2624	96.5328
12.2688	96	12.2688	96.3837
12.2752	94	12.2752	96.2424
12.2816	93	12.2816	96.094
12.288	87	12.288	95.9537
12.2944	88	12.2944	95.808
12.3008	100	12.3008	95.6603
12.3072	103	12.3072	95.5212
12.3136	90	12.3136	95.3743
12.32	94	12.32	95.2361
12.3264	110	12.3264	95.0921
12.3328	108	12.3328	94.9522
12.3392	75	12.3392	94.8088
12.3456	68	12.3456	94.6636
12.352	108	12.352	94.5273
12.3584	89	12.3584	94.3827
12.3648	95	12.3648	94.2471
12.3712	105	12.3712	94.1032
12.3776	97	12.3776	93.9662
12.384	79	12.384	93.8252
12.3904	78	12.3904	93.6821
12.3968	94	12.3968	93.5485
12.4032	91	12.4032	93.4061
12.4096	89	12.4096	93.2711
12.416	115	12.416	93.1316
12.4224	92	12.4224	92.9973
12.4288	108	12.4288	92.8562
12.4352	81	12.4352	92.7225
12.4416	77	12.4416	92.5845
12.448	101	12.448	92.4442
12.4544	97	12.4544	92.3117
12.4608	93	12.4608	92.1721
12.4672	93	12.4672	92.0428
12.4736	90	12.4736	91.9039
12.48	104	12.48	91.7728
12.4864	98	12.4864	91.6345
12.4928	95	12.4928	91.5042
12.4992	102	12.4992	91.3665
12.5056	94	12.5056	91.2368
12.512	81	12.512	91.0997
12.5184	82	12.5184	90.9708
12.5248	96	12.5248	90.8344
12.5312	97	12.5312	90.709
12.5376	100	12.5376	90.573
12.544	80	12.544	90.4457
12.5504	96	12.5504	90.3103
12.5568	114	12.5568	90.1809
12.5632	90	12.5632	90.0461
12.5696	72	12.5696	89.9202
12.576	102	12.576	89.7861
12.5824	94	12.5824	89.6609
12.5888	101	12.5888	89.5273
12.5952	82	12.5952	89.4028
12.6016	87	12.6016	89.2699
12.608	82	12.608	89.1462
12.6144	91	12.6144	89.0138
12.6208	81	12.6208	88.8877
12.6272	79	12.6272	88.756
12.6336	90	12.6336	88.6337
12.64	76	12.64	88.5025
12.6464	94	12.6464	88.3778
12.6528	92	12.6528	88.2471
12.6592	108	12.6592	88.1262
12.6656	85	12.6656	87.9962
12.672	85	12.672	87.8728
12.6784	85	12.6784	87.753
12.6848	86	12.6848	87.6239
12.6912	76	12.6912	87.5015
12.6976	67	12.6976	87.3729
12.704	99	12.704	87.2512
12.7104	89	12.7104	87.1232
12.7168	87	12.7168	87.0062
12.7232	85	12.7232	86.8807
12.7296	68	12.7296	86.7554
12.736	86	12.736	86.6336
12.7424	84	12.7424	86.5121
12.7488	87	12.7488	86.3908
12.7552	89	12.7552	86.2666
12.7616	77	12.7616	86.1459
12.768	92	12.768	86.0254
12.7744	98	12.7744	85.9052
12.7808	81	12.7808	85.7821
12.7872	90	12.7872	85.6624
[truncated: 27,026 more rows]

## Sheet: Fig3b
Time[µs]	Intensity[Cnts]	Time[µs]	Fit
0	13	0	---
0.0016	15	0.0016	---
0.0032	15	0.0032	---
0.0048	82	0.0048	---
0.0064	4364	0.0064	---
0.008	4249	0.008	---
0.0096	3986	0.0096	---
0.0112	3960	0.0112	---
0.0128	3942	0.0128	---
0.0144	3802	0.0144	---
0.016	3613	0.016	---
0.0176	3541	0.0176	---
0.0192	3549	0.0192	---
0.0208	3606	0.0208	---
0.0224	3549	0.0224	---
0.024	3509	0.024	---
0.0256	3359	0.0256	---
0.0272	3434	0.0272	---
0.0288	3395	0.0288	---
0.0304	5481	0.0304	---
0.032	8192	0.032	---
0.0336	7751	0.0336	---
0.0352	7636	0.0352	---
0.0368	7611	0.0368	---
0.0384	7260	0.0384	---
0.04	7292	0.04	---
0.0416	7215	0.0416	---
0.0432	7188	0.0432	---
0.0448	7011	0.0448	---
0.0464	6904	0.0464	---
0.048	6798	0.048	---
0.0496	6886	0.0496	---
0.0512	6843	0.0512	---
0.0528	6741	0.0528	---
0.0544	6745	0.0544	---
0.056	10957	0.056	---
0.0576	11346	0.0576	---
0.0592	11263	0.0592	---
0.0608	11109	0.0608	---
0.0624	10853	0.0624	---
0.064	10696	0.064	---
0.0656	10693	0.0656	---
0.0672	10575	0.0672	---
0.0688	10585	0.0688	---
0.0704	10505	0.0704	---
0.072	10303	0.072	---
0.0736	10350	0.0736	---
0.0752	10148	0.0752	---
0.0768	10185	0.0768	---
0.0784	10166	0.0784	---
0.08	10986	0.08	---
0.0816	15085	0.0816	---
0.0832	14375	0.0832	---
0.0848	14329	0.0848	---
0.0864	14049	0.0864	---
0.088	13830	0.088	---
0.0896	14031	0.0896	---
0.0912	13672	0.0912	---
0.0928	13519	0.0928	---
0.0944	13746	0.0944	---
0.096	13491	0.096	---
0.0976	13381	0.0976	---
0.0992	13372	0.0992	---
0.1008	12924	0.1008	---
0.1024	13213	0.1024	---
0.104	13081	0.104	---
0.1056	15997	0.1056	---
0.1072	18082	0.1072	---
0.1088	17592	0.1088	---
0.1104	17434	0.1104	---
0.112	17083	0.112	---
0.1136	17034	0.1136	---
0.1152	16824	0.1152	---
0.1168	16818	0.1168	---
0.1184	16531	0.1184	---
0.12	16430	0.12	---
0.1216	16531	0.1216	---
0.1232	16318	0.1232	---
0.1248	16396	0.1248	---
0.1264	16178	0.1264	---
0.128	16324	0.128	---
0.1296	15926	0.1296	---
0.1312	20869	0.1312	---
0.1328	20573	0.1328	---
0.1344	20344	0.1344	---
0.136	20226	0.136	---
0.1376	20137	0.1376	---
0.1392	19843	0.1392	---
0.1408	19431	0.1408	---
0.1424	19761	0.1424	---
0.144	19563	0.144	---
0.1456	19410	0.1456	---
0.1472	19452	0.1472	---
0.1488	19090	0.1488	---
0.1504	19171	0.1504	---
0.152	18854	0.152	---
0.1536	18834	0.1536	---
0.1552	20412	0.1552	---
0.1568	24035	0.1568	---
0.1584	23518	0.1584	---
0.16	23299	0.16	---
0.1616	23118	0.1616	---
0.1632	22829	0.1632	---
0.1648	22792	0.1648	---
0.1664	22271	0.1664	---
0.168	22287	0.168	---
0.1696	22271	0.1696	---
0.1712	22002	0.1712	---
0.1728	21706	0.1728	---
0.1744	21771	0.1744	---
0.176	21752	0.176	---
0.1776	21528	0.1776	---
0.1792	21811	0.1792	---
0.1808	25042	0.1808	---
0.1824	26414	0.1824	---
0.184	25995	0.184	---
0.1856	25956	0.1856	---
0.1872	25432	0.1872	---
0.1888	25299	0.1888	---
0.1904	25154	0.1904	---
0.192	25299	0.192	---
0.1936	24894	0.1936	---
0.1952	24709	0.1952	---
0.1968	24658	0.1968	---
0.1984	24563	0.1984	---
0.2	24482	0.2	---
0.2016	24364	0.2016	---
0.2032	24504	0.2032	---
0.2048	24532	0.2048	---
0.2064	29159	0.2064	---
0.208	28486	0.208	---
0.2096	28593	0.2096	---
0.2112	28037	0.2112	---
0.2128	27962	0.2128	---
0.2144	28038	0.2144	---
0.216	27780	0.216	---
0.2176	27524	0.2176	---
0.2192	27725	0.2192	---
0.2208	27268	0.2208	---
0.2224	27158	0.2224	---
0.224	27120	0.224	---
0.2256	26902	0.2256	---
0.2272	26573	0.2272	---
0.2288	26396	0.2288	---
0.2304	28988	0.2304	---
0.232	31619	0.232	---
0.2336	31449	0.2336	---
0.2352	31491	0.2352	---
0.2368	30693	0.2368	---
0.2384	30581	0.2384	---
0.24	30290	0.24	---
0.2416	30305	0.2416	---
0.2432	29774	0.2432	---
0.2448	29917	0.2448	---
0.2464	29954	0.2464	---
0.248	29429	0.248	---
0.2496	29388	0.2496	---
0.2512	29328	0.2512	---
0.2528	28643	0.2528	---
0.2544	29250	0.2544	---
0.256	33333	0.256	---
0.2576	33995	0.2576	---
0.2592	33843	0.2592	---
0.2608	33171	0.2608	---
0.2624	33083	0.2624	---
0.264	32885	0.264	---
0.2656	32802	0.2656	---
0.2672	32432	0.2672	---
0.2688	32278	0.2688	---
0.2704	32424	0.2704	---
0.272	31915	0.272	---
0.2736	31933	0.2736	---
0.2752	31829	0.2752	---
0.2768	31765	0.2768	---
0.2784	31381	0.2784	---
0.28	32381	0.28	---
0.2816	36117	0.2816	---
0.2832	35864	0.2832	---
0.2848	36382	0.2848	---
0.2864	35828	0.2864	---
0.288	35525	0.288	---
0.2896	35133	0.2896	---
0.2912	34872	0.2912	---
0.2928	34607	0.2928	---
0.2944	35163	0.2944	---
0.296	34438	0.296	---
0.2976	34367	0.2976	---
0.2992	33808	0.2992	---
0.3008	34047	0.3008	---
0.3024	33733	0.3024	---
0.304	33779	0.304	---
0.3056	36741	0.3056	---
0.3072	39150	0.3072	---
0.3088	38033	0.3088	---
0.3104	37911	0.3104	---
0.312	37760	0.312	---
0.3136	37458	0.3136	---
0.3152	37313	0.3152	---
0.3168	36857	0.3168	---
0.3184	36648	0.3184	---
0.32	36352	0.32	---
0.3216	36695	0.3216	---
0.3232	36251	0.3232	---
0.3248	36027	0.3248	---
0.3264	36425	0.3264	---
0.328	35458	0.328	---
0.3296	35788	0.3296	---
0.3312	40562	0.3312	---
0.3328	40414	0.3328	---
0.3344	40066	0.3344	---
0.336	39799	0.336	---
0.3376	39635	0.3376	---
0.3392	39347	0.3392	---
0.3408	38596	0.3408	---
0.3424	38902	0.3424	---
0.344	38911	0.344	---
0.3456	38725	0.3456	---
0.3472	38830	0.3472	---
0.3488	38318	0.3488	---
0.3504	38025	0.3504	---
0.352	38231	0.352	---
0.3536	37955	0.3536	---
0.3552	39209	0.3552	---
0.3568	42796	0.3568	---
0.3584	42504	0.3584	---
0.36	42169	0.36	---
0.3616	41220	0.3616	---
0.3632	41253	0.3632	---
0.3648	40832	0.3648	---
0.3664	41233	0.3664	---
0.368	40813	0.368	---
0.3696	40345	0.3696	---
0.3712	40492	0.3712	---
0.3728	40357	0.3728	---
0.3744	39862	0.3744	---
0.376	40183	0.376	---
0.3776	40346	0.3776	---
0.3792	39717	0.3792	---
0.3808	42967	0.3808	---
0.3824	43932	0.3824	---
0.384	44262	0.384	---
0.3856	43987	0.3856	---
0.3872	43329	0.3872	---
0.3888	42831	0.3888	---
0.3904	43134	0.3904	---
0.392	42707	0.392	---
0.3936	42637	0.3936	---
0.3952	42726	0.3952	---
0.3968	42344	0.3968	---
0.3984	42082	0.3984	---
0.4	42095	0.4	---
0.4016	41781	0.4016	---
0.4032	41815	0.4032	---
0.4048	41637	0.4048	---
0.4064	46565	0.4064	---
0.408	45779	0.408	---
0.4096	45955	0.4096	---
0.4112	45056	0.4112	---
0.4128	44889	0.4128	---
0.4144	44924	0.4144	---
0.416	44323	0.416	---
0.4176	44685	0.4176	---
0.4192	45017	0.4192	---
0.4208	44264	0.4208	---
0.4224	44005	0.4224	---
0.424	43711	0.424	---
0.4256	43743	0.4256	---
0.4272	42931	0.4272	---
0.4288	43549	0.4288	---
0.4304	45723	0.4304	---
0.432	47879	0.432	---
0.4336	47503	0.4336	---
0.4352	47408	0.4352	---
0.4368	46945	0.4368	---
0.4384	46848	0.4384	---
0.44	46667	0.44	---
0.4416	46167	0.4416	---
0.4432	46008	0.4432	---
0.4448	46108	0.4448	---
0.4464	45570	0.4464	---
0.448	45470	0.448	---
0.4496	45545	0.4496	---
0.4512	45061	0.4512	---
0.4528	45159	0.4528	---
0.4544	44963	0.4544	---
0.456	49356	0.456	---
0.4576	49549	0.4576	---
0.4592	49027	0.4592	---
0.4608	49331	0.4608	---
0.4624	48451	0.4624	---
0.464	48475	0.464	---
0.4656	47850	0.4656	---
0.4672	47905	0.4672	---
0.4688	47484	0.4688	---
0.4704	47307	0.4704	---
0.472	47034	0.472	---
0.4736	47096	0.4736	---
0.4752	46856	0.4752	---
0.4768	46634	0.4768	---
0.4784	46687	0.4784	---
0.48	47672	0.48	---
0.4816	51193	0.4816	---
0.4832	50827	0.4832	---
0.4848	50536	0.4848	---
0.4864	50320	0.4864	---
0.488	50105	0.488	---
0.4896	49720	0.4896	---
0.4912	49405	0.4912	---
0.4928	49233	0.4928	---
0.4944	48921	0.4944	---
0.496	48796	0.496	---
0.4976	48562	0.4976	---
0.4992	48043	0.4992	---
0.5008	48096	0.5008	---
0.5024	48431	0.5024	---
0.504	48037	0.504	---
0.5056	51224	0.5056	---
0.5072	52529	0.5072	---
0.5088	51949	0.5088	---
0.5104	52042	0.5104	---
0.512	51605	0.512	---
0.5136	51002	0.5136	---
0.5152	51109	0.5152	---
0.5168	50821	0.5168	---
0.5184	50445	0.5184	---
0.52	50442	0.52	---
0.5216	50073	0.5216	---
0.5232	49587	0.5232	---
0.5248	49781	0.5248	---
0.5264	49561	0.5264	---
0.528	49654	0.528	---
0.5296	49553	0.5296	---
0.5312	53858	0.5312	---
0.5328	53880	0.5328	---
0.5344	53617	0.5344	---
0.536	53175	0.536	---
0.5376	52938	0.5376	---
0.5392	52518	0.5392	---
0.5408	52136	0.5408	---
0.5424	52338	0.5424	---
0.544	52131	0.544	---
0.5456	51741	0.5456	---
0.5472	51398	0.5472	---
0.5488	51421	0.5488	---
0.5504	51131	0.5504	---
0.552	50492	0.552	---
0.5536	50448	0.5536	---
0.5552	52598	0.5552	---
0.5568	55351	0.5568	---
0.5584	54960	0.5584	---
0.56	54869	0.56	---
0.5616	54540	0.5616	---
0.5632	53906	0.5632	---
0.5648	54084	0.5648	---
0.5664	53224	0.5664	---
0.568	53456	0.568	---
0.5696	53214	0.5696	---
0.5712	53363	0.5712	---
0.5728	52850	0.5728	---
0.5744	52594	0.5744	---
0.576	52338	0.576	---
0.5776	52171	0.5776	---
0.5792	51970	0.5792	---
0.5808	54967	0.5808	---
0.5824	56442	0.5824	---
0.584	55657	0.584	---
0.5856	55868	0.5856	---
0.5872	55118	0.5872	---
0.5888	55228	0.5888	---
0.5904	54565	0.5904	---
0.592	54696	0.592	---
0.5936	54053	0.5936	---
0.5952	54274	0.5952	---
0.5968	54061	0.5968	---
0.5984	53948	0.5984	---
0.6	53286	0.6	---
0.6016	53165	0.6016	---
0.6032	53567	0.6032	---
0.6048	53557	0.6048	---
0.6064	57436	0.6064	---
0.608	57412	0.608	---
0.6096	56988	0.6096	---
0.6112	57424	0.6112	---
0.6128	56728	0.6128	---
0.6144	56269	0.6144	---
0.616	56498	0.616	---
0.6176	56358	0.6176	---
0.6192	56277	0.6192	---
0.6208	55452	0.6208	---
0.6224	55488	0.6224	---
0.624	54793	0.624	---
0.6256	55053	0.6256	---
0.6272	54440	0.6272	---
0.6288	54726	0.6288	---
0.6304	56568	0.6304	---
0.632	59214	0.632	---
0.6336	58717	0.6336	---
0.6352	58385	0.6352	---
0.6368	57606	0.6368	---
0.6384	57647	0.6384	---
0.64	57553	0.64	---
0.6416	57856	0.6416	---
0.6432	57028	0.6432	---
0.6448	56846	0.6448	---
0.6464	56892	0.6464	---
0.648	56569	0.648	---
0.6496	56619	0.6496	---
0.6512	55756	0.6512	---
0.6528	55700	0.6528	---
0.6544	55629	0.6544	---
0.656	59504	0.656	---
0.6576	59997	0.6576	---
0.6592	59347	0.6592	---
0.6608	59133	0.6608	---
0.6624	58873	0.6624	---
0.664	58442	0.664	---
0.6656	58298	0.6656	---
0.6672	58605	0.6672	---
0.6688	57937	0.6688	---
0.6704	57636	0.6704	---
0.672	57501	0.672	---
0.6736	57060	0.6736	---
0.6752	57279	0.6752	---
0.6768	57107	0.6768	---
0.6784	56814	0.6784	---
0.68	57852	0.68	---
0.6816	61488	0.6816	---
0.6832	60579	0.6832	---
0.6848	61074	0.6848	---
0.6864	60391	0.6864	---
0.688	59918	0.688	---
0.6896	59936	0.6896	---
0.6912	59183	0.6912	---
0.6928	59372	0.6928	---
0.6944	58851	0.6944	---
0.696	58755	0.696	---
0.6976	58426	0.6976	---
0.6992	58651	0.6992	---
0.7008	58327	0.7008	---
0.7024	58187	0.7024	---
0.704	57844	0.704	---
0.7056	60610	0.7056	---
0.7072	62809	0.7072	---
0.7088	62343	0.7088	---
0.7104	61441	0.7104	---
0.712	60676	0.712	---
0.7136	60711	0.7136	---
0.7152	60899	0.7152	---
0.7168	60330	0.7168	---
0.7184	60271	0.7184	---
0.72	60083	0.72	---
0.7216	60024	0.7216	---
0.7232	59248	0.7232	---
0.7248	59325	0.7248	---
0.7264	59186	0.7264	---
0.728	59276	0.728	---
0.7296	58990	0.7296	---
0.7312	63807	0.7312	---
0.7328	63241	0.7328	---
0.7344	62969	0.7344	---
0.736	62110	0.736	---
0.7376	61449	0.7376	---
0.7392	61920	0.7392	---
0.7408	61604	0.7408	---
0.7424	61268	0.7424	---
0.744	61242	0.744	---
0.7456	60857	0.7456	---
0.7472	60627	0.7472	---
0.7488	60185	0.7488	---
0.7504	60102	0.7504	---
0.752	59897	0.752	---
0.7536	59862	0.7536	---
0.7552	61539	0.7552	---
0.7568	64349	0.7568	---
0.7584	64168	0.7584	---
0.76	63741	0.76	---
0.7616	63260	0.7616	---
0.7632	62855	0.7632	---
0.7648	62610	0.7648	---
0.7664	62418	0.7664	---
0.768	61982	0.768	---
0.7696	61886	0.7696	---
0.7712	61896	0.7712	---
0.7728	61160	0.7728	---
0.7744	61458	0.7744	---
0.776	61333	0.776	---
0.7776	60836	0.7776	---
0.7792	60564	0.7792	---
0.7808	64240	0.7808	---
0.7824	65328	0.7824	---
0.784	64261	0.784	---
0.7856	64017	0.7856	---
0.7872	64396	0.7872	---
0.7888	64146	0.7888	---
0.7904	63252	0.7904	---
0.792	63493	0.792	---
0.7936	63210	0.7936	---
0.7952	62814	0.7952	---
0.7968	62719	0.7968	---
0.7984	62085	0.7984	---
0.8	62179	0.8	---
0.8016	62167	0.8016	---
0.8032	61981	0.8032	---
0.8048	62353	0.8048	---
0.8064	65910	0.8064	---
0.808	65833	0.808	---
0.8096	65932	0.8096	---
0.8112	65323	0.8112	---
0.8128	64910	0.8128	---
0.8144	64335	0.8144	---
0.816	64576	0.816	---
0.8176	64294	0.8176	---
0.8192	63612	0.8192	---
0.8208	63651	0.8208	---
0.8224	63481	0.8224	---
0.824	63284	0.824	---
0.8256	63421	0.8256	---
0.8272	62204	0.8272	---
0.8288	62679	0.8288	---
0.8304	64500	0.8304	---
0.832	67218	0.832	---
0.8336	66866	0.8336	---
0.8352	65945	0.8352	---
0.8368	66086	0.8368	---
0.8384	65296	0.8384	---
0.84	65253	0.84	---
0.8416	65080	0.8416	---
0.8432	64538	0.8432	---
0.8448	64495	0.8448	---
0.8464	64026	0.8464	---
0.848	63764	0.848	---
0.8496	64290	0.8496	---
0.8512	63959	0.8512	---
0.8528	63527	0.8528	---
0.8544	63132	0.8544	---
0.856	67385	0.856	---
0.8576	67630	0.8576	---
0.8592	67009	0.8592	---
0.8608	66817	0.8608	---
0.8624	66546	0.8624	---
0.864	66421	0.864	---
0.8656	65741	0.8656	---
0.8672	65933	0.8672	---
0.8688	65318	0.8688	---
0.8704	66067	0.8704	---
0.872	64842	0.872	---
0.8736	64664	0.8736	---
0.8752	64673	0.8752	---
0.8768	64521	0.8768	---
0.8784	64177	0.8784	---
0.88	65012	0.88	---
0.8816	68938	0.8816	---
0.8832	68048	0.8832	---
0.8848	67773	0.8848	---
0.8864	67770	0.8864	---
0.888	67506	0.888	---
0.8896	66648	0.8896	---
0.8912	66672	0.8912	---
0.8928	66321	0.8928	---
0.8944	66120	0.8944	---
0.896	65909	0.896	---
0.8976	65899	0.8976	---
0.8992	65594	0.8992	---
0.9008	65649	0.9008	---
0.9024	65450	0.9024	---
0.904	64828	0.904	---
0.9056	67612	0.9056	---
0.9072	69498	0.9072	---
0.9088	68764	0.9088	---
0.9104	68382	0.9104	---
0.912	68483	0.912	---
0.9136	68328	0.9136	---
0.9152	67243	0.9152	---
0.9168	67145	0.9168	---
0.9184	66985	0.9184	---
0.92	66698	0.92	---
0.9216	66307	0.9216	---
0.9232	66320	0.9232	---
0.9248	66445	0.9248	---
0.9264	65907	0.9264	---
0.928	66309	0.928	---
0.9296	66024	0.9296	---
0.9312	70389	0.9312	---
0.9328	69409	0.9328	---
0.9344	69676	0.9344	---
0.936	68691	0.936	---
0.9376	68608	0.9376	---
0.9392	68343	0.9392	---
0.9408	68307	0.9408	---
0.9424	67658	0.9424	---
0.944	68020	0.944	---
0.9456	67281	0.9456	---
0.9472	67471	0.9472	---
0.9488	67355	0.9488	---
0.9504	66763	0.9504	---
0.952	66186	0.952	---
0.9536	66126	0.9536	---
0.9552	67666	0.9552	---
0.9568	70840	0.9568	---
0.9584	70333	0.9584	---
0.96	70025	0.96	---
0.9616	69820	0.9616	---
0.9632	69615	0.9632	---
0.9648	69151	0.9648	---
0.9664	69083	0.9664	---
0.968	68989	0.968	---
0.9696	67965	0.9696	---
0.9712	68063	0.9712	---
0.9728	67967	0.9728	---
0.9744	68035	0.9744	---
0.976	67646	0.976	---
0.9776	67162	0.9776	---
0.9792	67026	0.9792	---
0.9808	70383	0.9808	---
0.9824	71303	0.9824	---
0.984	71012	0.984	---
0.9856	69888	0.9856	---
0.9872	70074	0.9872	---
0.9888	70284	0.9888	---
0.9904	69638	0.9904	---
0.992	69443	0.992	---
0.9936	69595	0.9936	---
0.9952	68792	0.9952	---
0.9968	68994	0.9968	---
0.9984	68648	0.9984	---
1	68274	1	---
1.0016	67640	1.0016	---
1.0032	67854	1.0032	---
1.0048	68232	1.0048	---
1.0064	72794	1.0064	---
1.008	71821	1.008	---
1.0096	71808	1.0096	---
1.0112	70634	1.0112	---
1.0128	70597	1.0128	---
1.0144	69843	1.0144	---
1.016	70302	1.016	---
1.0176	69958	1.0176	---
1.0192	69821	1.0192	---
1.0208	69757	1.0208	---
1.0224	69561	1.0224	---
1.024	69091	1.024	---
1.0256	68257	1.0256	---
1.0272	68862	1.0272	---
1.0288	68182	1.0288	---
1.0304	70031	1.0304	---
1.032	72900	1.032	---
1.0336	72094	1.0336	---
1.0352	72324	1.0352	---
1.0368	71540	1.0368	---
1.0384	71555	1.0384	---
1.04	70924	1.04	---
1.0416	71119	1.0416	---
1.0432	69826	1.0432	---
1.0448	70292	1.0448	---
1.0464	69767	1.0464	---
1.048	69632	1.048	---
1.0496	69696	1.0496	---
1.0512	69341	1.0512	---
1.0528	69972	1.0528	---
1.0544	69206	1.0544	---
1.056	72955	1.056	---
1.0576	72784	1.0576	---
1.0592	72457	1.0592	---
1.0608	72278	1.0608	---
1.0624	71991	1.0624	---
1.064	71695	1.064	---
1.0656	71625	1.0656	---
1.0672	71311	1.0672	---
1.0688	70919	1.0688	---
1.0704	70568	1.0704	---
1.072	70643	1.072	---
1.0736	70637	1.0736	---
1.0752	70319	1.0752	---
1.0768	69916	1.0768	---
1.0784	69341	1.0784	---
1.08	70225	1.08	---
1.0816	73871	1.0816	---
1.0832	73724	1.0832	---
1.0848	73442	1.0848	---
1.0864	72933	1.0864	---
1.088	72901	1.088	---
1.0896	72899	1.0896	---
1.0912	72020	1.0912	---
1.0928	71835	1.0928	---
1.0944	71336	1.0944	---
1.096	71252	1.096	---
1.0976	70951	1.0976	---
1.0992	70982	1.0992	---
1.1008	70491	1.1008	---
1.1024	70107	1.1024	---
1.104	70003	1.104	---
1.1056	72556	1.1056	---
1.1072	74434	1.1072	---
1.1088	74252	1.1088	---
1.1104	73301	1.1104	---
1.112	73905	1.112	---
1.1136	72749	1.1136	---
1.1152	72484	1.1152	---
1.1168	72510	1.1168	---
1.1184	71878	1.1184	---
1.12	72206	1.12	---
1.1216	71961	1.1216	---
1.1232	71529	1.1232	---
1.1248	71406	1.1248	---
1.1264	71185	1.1264	---
1.128	71706	1.128	---
1.1296	70671	1.1296	---
1.1312	75019	1.1312	---
1.1328	74955	1.1328	---
1.1344	74770	1.1344	---
1.136	73917	1.136	---
1.1376	73344	1.1376	---
1.1392	73310	1.1392	---
1.1408	72973	1.1408	---
1.1424	72971	1.1424	---
1.144	72753	1.144	---
1.1456	72437	1.1456	---
1.1472	72168	1.1472	---
1.1488	71592	1.1488	---
1.1504	71927	1.1504	---
1.152	71600	1.152	---
1.1536	71250	1.1536	---
1.1552	72397	1.1552	---
1.1568	75799	1.1568	---
1.1584	75389	1.1584	---
1.16	74818	1.16	---
1.1616	74542	1.1616	---
1.1632	73811	1.1632	---
1.1648	73858	1.1648	---
1.1664	73401	1.1664	---
1.168	73195	1.168	---
1.1696	72347	1.1696	---
1.1712	72749	1.1712	---
1.1728	73127	1.1728	---
1.1744	72002	1.1744	---
1.176	72044	1.176	---
1.1776	72023	1.1776	---
1.1792	71622	1.1792	---
1.1808	74909	1.1808	---
1.1824	76048	1.1824	---
1.184	76083	1.184	---
1.1856	75150	1.1856	---
1.1872	75083	1.1872	---
1.1888	74132	1.1888	---
1.1904	74238	1.1904	---
1.192	73430	1.192	---
1.1936	73843	1.1936	---
1.1952	72896	1.1952	---
1.1968	73102	1.1968	---
1.1984	72859	1.1984	---
1.2	73082	1.2	---
1.2016	72929	1.2016	---
1.2032	72293	1.2032	---
1.2048	72079	1.2048	---
1.2064	76142	1.2064	---
1.208	76032	1.208	---
1.2096	75803	1.2096	---
1.2112	75663	1.2112	---
1.2128	75153	1.2128	---
1.2144	74762	1.2144	---
1.216	74660	1.216	---
1.2176	74159	1.2176	---
1.2192	74668	1.2192	---
1.2208	73190	1.2208	---
1.2224	73591	1.2224	---
1.224	73517	1.224	---
1.2256	73230	1.2256	---
1.2272	72844	1.2272	---
1.2288	72671	1.2288	---
1.2304	74815	1.2304	---
1.232	76701	1.232	---
1.2336	76792	1.2336	---
1.2352	76819	1.2352	---
1.2368	75355	1.2368	---
1.2384	75628	1.2384	---
1.24	75806	1.24	---
1.2416	75027	1.2416	---
1.2432	74877	1.2432	---
1.2448	74933	1.2448	---
1.2464	73929	1.2464	---
1.248	74119	1.248	---
1.2496	73713	1.2496	---
1.2512	73849	1.2512	72375.3
1.2528	73434	1.2528	72223
1.2544	72879	1.2544	72071.2
1.256	72730	1.256	71919.5
1.2576	72677	1.2576	71768.3
1.2592	72720	1.2592	71617.3
1.2608	72308	1.2608	71466.9
1.2624	72452	1.2624	71316.4
1.264	72117	1.264	71166.7
1.2656	71928	1.2656	71016.9
1.2672	71770	1.2672	70868
1.2688	71475	1.2688	70719.3
1.2704	70904	1.2704	70570.5
1.272	70762	1.272	70422.6
1.2736	70939	1.2736	70274.3
1.2752	70368	1.2752	70127
1.2768	70164	1.2768	69979.5
1.2784	70260	1.2784	69832.9
1.28	70144	1.28	69686.9
1.2816	69731	1.2816	69540.1
1.2832	70205	1.2832	69394.7
1.2848	69498	1.2848	69248.6
1.2864	70018	1.2864	69103.7
1.288	69298	1.288	68959.1
1.2896	68754	1.2896	68814.1
1.2912	68858	1.2912	68670.3
1.2928	68519	1.2928	68525.6
1.2944	68833	1.2944	68382.4
1.296	68386	1.296	68240
1.2976	68330	1.2976	68096.1
1.2992	68115	1.2992	67954
1.3008	68332	1.3008	67810.4
1.3024	67426	1.3024	67669.3
1.304	67496	1.304	67528.3
1.3056	67622	1.3056	67386
1.3072	67373	1.3072	67245.9
1.3088	67225	1.3088	67105.9
1.3104	67582	1.3104	66964
1.312	66944	1.312	66824.6
1.3136	66422	1.3136	66686
1.3152	66971	1.3152	66544.9
1.3168	66688	1.3168	66406.5
1.3184	66778	1.3184	66266
1.32	66652	1.32	66128.7
1.3216	66354	1.3216	65991.4
1.3232	65992	1.3232	65851.7
1.3248	65913	1.3248	65715.6
1.3264	66110	1.3264	65578.5
1.328	65630	1.328	65439.6
1.3296	65358	1.3296	65303.9
1.3312	65725	1.3312	65169.1
1.3328	65134	1.3328	65033.4
1.3344	65117	1.3344	64895.7
1.336	64692	1.336	64761.9
1.3376	65162	1.3376	64627.2
1.3392	64648	1.3392	64490.2
1.3408	64783	1.3408	64357
1.3424	64139	1.3424	64223.8
1.344	64377	1.344	64087.6
1.3456	63939	1.3456	63955.4
1.3472	63367	1.3472	63823.1
1.3488	64078	1.3488	63690.7
1.3504	63944	1.3504	63555.5
1.352	64113	1.352	63424.6
1.3536	63293	1.3536	63293.8
1.3552	63006	1.3552	63159.4
1.3568	63105	1.3568	63028.5
1.3584	62860	1.3584	62898.6
1.36	63034	1.36	62768.3
1.3616	62742	1.3616	62635.2
1.3632	62360	1.3632	62505.4
1.3648	62245	1.3648	62376.9
1.3664	61964	1.3664	62247.7
1.368	61924	1.368	62115.7
1.3696	62457	1.3696	61988
1.3712	61546	1.3712	61860
1.3728	61867	1.3728	61732.3
1.3744	61484	1.3744	61600.8
1.376	61171	1.376	61473.7
1.3776	61348	1.3776	61346.7
1.3792	61168	1.3792	61220.2
1.3808	60972	1.3808	61091.1
1.3824	61536	1.3824	60963.9
1.384	60966	1.384	60838.2
1.3856	60581	1.3856	60714
1.3872	60487	1.3872	60588.9
1.3888	60426	1.3888	60459
1.3904	60070	1.3904	60335.5
1.392	60077	1.392	60211.5
1.3936	59779	1.3936	60086.2
1.3952	59730	1.3952	59958.7
1.3968	59679	1.3968	59835.1
1.3984	59519	1.3984	59712.1
1.4	59521	1.4	59588.2
1.4016	59417	1.4016	59467
1.4032	59191	1.4032	59343.8
1.4048	59138	1.4048	59217.5
1.4064	59048	1.4064	59095.7
1.408	59025	1.408	58974.9
1.4096	58747	1.4096	58852.8
1.4112	58635	1.4112	58733.5
1.4128	58149	1.4128	58607
1.4144	58448	1.4144	58485.8
1.416	58205	1.416	58365.8
1.4176	58177	1.4176	58246.5
1.4192	57932	1.4192	58126.2
1.4208	58044	1.4208	58007.1
1.4224	57814	1.4224	57888.7
1.424	57470	1.424	57764.3
1.4256	57948	1.4256	57644.8
1.4272	57656	1.4272	57526.9
1.4288	57300	1.4288	57408.3
1.4304	57554	1.4304	57289.6
1.432	56915	1.432	57172.7
1.4336	57153	1.4336	57055
1.4352	56328	1.4352	56939
1.4368	56742	1.4368	56817.5
1.4384	56730	1.4384	56700.7
1.44	56427	1.44	56583.8
1.4416	56204	1.4416	56466.7
1.4432	56301	1.4432	56350.7
1.4448	56330	1.4448	56234.7
1.4464	56303	1.4464	56120.4
1.448	55915	1.448	56004.9
1.4496	55825	1.4496	55890.1
1.4512	55910	1.4512	55770.8
1.4528	55687	1.4528	55656.1
1.4544	55007	1.4544	55542.2
1.456	55790	1.456	55427.6
1.4576	55077	1.4576	55313.8
1.4592	55245	1.4592	55200.3
1.4608	54467	1.4608	55086.6
1.4624	54830	1.4624	54974.1
1.464	54932	1.464	54861.4
1.4656	54664	1.4656	54748.5
1.4672	54430	1.4672	54636.4
1.4688	54585	1.4688	54525
1.4704	54127	1.4704	54412.6
1.472	54402	1.472	54301.8
1.4736	53823	1.4736	54188.6
1.4752	53527	1.4752	54079.6
1.4768	53790	1.4768	53965.5
1.4784	53708	1.4784	53853.8
1.48	54029	1.48	53742.7
1.4816	53593	1.4816	53634.5
1.4832	53048	1.4832	53523.1
1.4848	53434	1.4848	53413.2
1.4864	53152	1.4864	53305.2
1.488	52903	1.488	53195
1.4896	52890	1.4896	53085.3
1.4912	53119	1.4912	52978.3
1.4928	52995	1.4928	52868.4
1.4944	52692	1.4944	52759.8
1.496	52542	1.496	52649.1
1.4976	52222	1.4976	52543.9
1.4992	52688	1.4992	52436
1.5008	52320	1.5008	52327.8
1.5024	52152	1.5024	52221.8
1.504	51885	1.504	52112.2
1.5056	51759	1.5056	52008.6
1.5072	51730	1.5072	51901.3
1.5088	51851	1.5088	51794.3
1.5104	51502	1.5104	51689.4
1.512	51530	1.512	51582.8
1.5136	51563	1.5136	51476.4
1.5152	51391	1.5152	51372.3
1.5168	51138	1.5168	51266.3
1.5184	51096	1.5184	51162.4
1.52	51051	1.52	51057.1
1.5216	50599	1.5216	50953.6
1.5232	50457	1.5232	50850.6
1.5248	50968	1.5248	50745.7
1.5264	50533	1.5264	50641.1
1.528	50202	1.528	50538.7
1.5296	50105	1.5296	50434.5
1.5312	50527	1.5312	50332.2
1.5328	50031	1.5328	50228.9
1.5344	50212	1.5344	50127
1.536	49828	1.536	50025.2
1.5376	49854	1.5376	49922.6
1.5392	49573	1.5392	49819.7
1.5408	49557	1.5408	49720.2
1.5424	49782	1.5424	49617.7
1.544	49512	1.544	49516
1.5456	49704	1.5456	49415.6
1.5472	49270	1.5472	49313.8
1.5488	49347	1.5488	49215.8
1.5504	48795	1.5504	49113
1.552	48890	1.552	49013.2
1.5536	48883	1.5536	48914
1.5552	48685	1.5552	48815.1
1.5568	49010	1.5568	48714.6
1.5584	48480	1.5584	48615.9
1.56	48581	1.56	48517.2
1.5616	48251	1.5616	48418.2
1.5632	47994	1.5632	48319.8
1.5648	48221	1.5648	48220.3
1.5664	48339	1.5664	48122.8
1.568	48011	1.568	48025
1.5696	48148	1.5696	47928.5
1.5712	47938	1.5712	47831.1
1.5728	47837	1.5728	47732.7
1.5744	47492	1.5744	47636.2
1.576	47117	1.576	47539.4
1.5776	47091	1.5776	47442.2
1.5792	47337	1.5792	47346.4
1.5808	46913	1.5808	47250.2
1.5824	46862	1.5824	47154.8
1.584	47266	1.584	47057.8
1.5856	46640	1.5856	46963.3
1.5872	46744	1.5872	46869.2
1.5888	46697	1.5888	46772.8
1.5904	46383	1.5904	46679.7
1.592	46419	1.592	46583.7
1.5936	46080	1.5936	46487.9
1.5952	46232	1.5952	46395.3
1.5968	46363	1.5968	46300
1.5984	45989	1.5984	46207.8
1.6	45875	1.6	46113.5
1.6016	45615	1.6016	46019.8
1.6032	45835	1.6032	45927.2
1.6048	45374	1.6048	45833.8
1.6064	45612	1.6064	45741.7
1.608	45558	1.608	45648.7
1.6096	45166	1.6096	45557
1.6112	44999	1.6112	45464.4
1.6128	44520	1.6128	45371.1
1.6144	45182	1.6144	45280.9
1.616	45417	1.616	45188.8
1.6176	45107	1.6176	45098.2
1.6192	45147	1.6192	45005.7
1.6208	44907	1.6208	44914.2
1.6224	44813	1.6224	44825
1.624	44625	1.624	44733.1
1.6256	44221	1.6256	44645
1.6272	44211	1.6272	44553.5
1.6288	44960	1.6288	44463
1.6304	43870	1.6304	44374.7
1.632	43951	1.632	44284.5
1.6336	44207	1.6336	44196
1.6352	43821	1.6352	44106.2
1.6368	43894	1.6368	44018.1
1.6384	43905	1.6384	43927.9
1.64	44164	1.64	43838.6
1.6416	43200	1.6416	43751.8
1.6432	43215	1.6432	43662.3
1.6448	43167	1.6448	43575.8
1.6464	43472	1.6464	43486.7
1.648	43263	1.648	43400.6
1.6496	42777	1.6496	43312.4
1.6512	43088	1.6512	43223.9
1.6528	42935	1.6528	43138.4
1.6544	43082	1.6544	43050.8
1.656	43031	1.656	42965.6
1.6576	43021	1.6576	42878.4
1.6592	43009	1.6592	42793.2
1.6608	42713	1.6608	42706.3
1.6624	42559	1.6624	42619.6
1.664	42294	1.664	42535.4
1.6656	42185	1.6656	42447.9
1.6672	42274	1.6672	42364.1
1.6688	42010	1.6688	42278.1
1.6704	42034	1.6704	42194.7
1.672	41756	1.672	42108.8
1.6736	41810	1.6736	42023.3
1.6752	41498	1.6752	41940.5
1.6768	41792	1.6768	41855.4
1.6784	41750	1.6784	41772.1
1.68	41809	1.68	41687.2
1.6816	41571	1.6816	41605.1
1.6832	41295	1.6832	41520.7
1.6848	41127	1.6848	41438.9
1.6864	41082	1.6864	41355
1.688	41186	1.688	41270.3
1.6896	41540	1.6896	41189.1
1.6912	40850	1.6912	41105.6
1.6928	40891	1.6928	41024.8
1.6944	40835	1.6944	40941.7
1.696	40812	1.696	40860.4
1.6976	40599	1.6976	40777.7
1.6992	40156	1.6992	40697.6
1.7008	40625	1.7008	40615.2
1.7024	40219	1.7024	40535.5
1.704	40250	1.704	40452.6
1.7056	40253	1.7056	40370.7
1.7072	40489	1.7072	40292
1.7088	39751	1.7088	40210.7
1.7104	40043	1.7104	40130.2
1.712	39892	1.712	40050.1
1.7136	40031	1.7136	39969.9
1.7152	39374	1.7152	39890.2
1.7168	39875	1.7168	39810.4
1.7184	39707	1.7184	39731.8
1.72	39836	1.72	39652.3
1.7216	39232	1.7216	39572.5
1.7232	39274	1.7232	39493.7
1.7248	39436	1.7248	39414.6
1.7264	38878	1.7264	39336.1
1.728	38832	1.728	39257.4
1.7296	39068	1.7296	39180.2
1.7312	38855	1.7312	39102.3
1.7328	38729	1.7328	39023.2
1.7344	38757	1.7344	38945.6
1.736	38865	1.736	38867.7
1.7376	38245	1.7376	38790.5
1.7392	38792	1.7392	38714.2
1.7408	38391	1.7408	38636.7
1.7424	38475	1.7424	38559.2
1.744	38308	1.744	38481.9
1.7456	38251	1.7456	38405.8
1.7472	38056	1.7472	38329.6
1.7488	38285	1.7488	38253.5
1.7504	37860	1.7504	38177.7
1.752	38250	1.752	38102
1.7536	37823	1.7536	38025
1.7552	37801	1.7552	37949.8
1.7568	37873	1.7568	37874.4
1.7584	37933	1.7584	37799.4
1.76	37964	1.76	37724.7
1.7616	37796	1.7616	37648.9
1.7632	37444	1.7632	37573.8
1.7648	37288	1.7648	37500.4
1.7664	37194	1.7664	37425
1.768	37017	1.768	37351.2
1.7696	37199	1.7696	37278.3
1.7712	37058	1.7712	37203.4
1.7728	36905	1.7728	37129.3
1.7744	36801	1.7744	37055.8
1.776	36895	1.776	36981.4
1.7776	36631	1.7776	36909.3
1.7792	36605	1.7792	36836.7
1.7808	36692	1.7808	36762
1.7824	36789	1.7824	36689.3
1.784	36353	1.784	36617.9
1.7856	36434	1.7856	36544.3
1.7872	36209	1.7872	36472.1
1.7888	36338	1.7888	36401.3
1.7904	36523	1.7904	36327.4
1.792	35929	1.792	36255.8
1.7936	36109	1.7936	36184.7
1.7952	36020	1.7952	36114.1
1.7968	35926	1.7968	36041.5
1.7984	35930	1.7984	35969.8
1.8	35805	1.8	35899.5
1.8016	35790	1.8016	35827.5
1.8032	35829	1.8032	35757.5
1.8048	35733	1.8048	35687.8
1.8064	35566	1.8064	35616.9
1.808	35191	1.808	35545.4
1.8096	35290	1.8096	35475.5
1.8112	35244	1.8112	35406.5
1.8128	35056	1.8128	35337
1.8144	35218	1.8144	35265.3
1.816	35038	1.816	35196.8
1.8176	35134	1.8176	35127.7
1.8192	35056	1.8192	35058.9
1.8208	35027	1.8208	34988.5
1.8224	34706	1.8224	34919.3
1.824	35012	1.824	34850.9
1.8256	34284	1.8256	34783.3
1.8272	34503	1.8272	34713.4
1.8288	34464	1.8288	34644.9
1.8304	34510	1.8304	34577.2
1.832	34775	1.832	34509.6
1.8336	34166	1.8336	34442.2
1.8352	34342	1.8352	34373.7
1.8368	34471	1.8368	34305.3
1.8384	34033	1.8384	34239
1.84	34162	1.84	34172.3
1.8416	34378	1.8416	34102.9
1.8432	34310	1.8432	34036.5
1.8448	33893	1.8448	33969.5
1.8464	33767	1.8464	33903.4
1.848	34005	1.848	33837.3
1.8496	33669	1.8496	33771.5
1.8512	33515	1.8512	33703
1.8528	33521	1.8528	33637.5
1.8544	33325	1.8544	33571.5
1.856	33570	1.856	33506.9
1.8576	33148	1.8576	33440.6
1.8592	33405	1.8592	33373.3
1.8608	33467	1.8608	33308.6
1.8624	32874	1.8624	33243.9
1.864	33022	1.864	33178.1
1.8656	33191	1.8656	33113.9
1.8672	33225	1.8672	33049.7
1.8688	33001	1.8688	32985
1.8704	32932	1.8704	32918
1.872	32989	1.872	32854.4
1.8736	32491	1.8736	32790.8
1.8752	32390	1.8752	32726.7
1.8768	32827	1.8768	32662.2
1.8784	32351	1.8784	32599
1.88	32254	1.88	32535.3
1.8816	32316	1.8816	32469.7
1.8832	32324	1.8832	32405.8
1.8848	32581	1.8848	32344.1
1.8864	32385	1.8864	32281.1
1.888	31938	1.888	32218.7
1.8896	32449	1.8896	32154.5
1.8912	31703	1.8912	32092.5
1.8928	31893	1.8928	32030
1.8944	32005	1.8944	31967.2
1.896	32217	1.896	31902.7
1.8976	31798	1.8976	31841.3
1.8992	31786	1.8992	31779.4
1.9008	31512	1.9008	31717.2
1.9024	31786	1.9024	31656.2
1.904	31488	1.904	31594.3
1.9056	31488	1.9056	31533
1.9072	31380	1.9072	31471.4
1.9088	31045	1.9088	31410
1.9104	31473	1.9104	31349.6
1.912	31167	1.912	31288.5
1.9136	30889	1.9136	31227.5
1.9152	31103	1.9152	31167.1
1.9168	31156	1.9168	31107.4
1.9184	31014	1.9184	31042.6
1.92	30870	1.92	30983.1
1.9216	30790	1.9216	30923.3
1.9232	30835	1.9232	30862.6
1.9248	31164	1.9248	30803.4
1.9264	30699	1.9264	30743.9
1.928	30536	1.928	30683.1
1.9296	30171	1.9296	30624.5
1.9312	30271	1.9312	30565.4
1.9328	30269	1.9328	30505
1.9344	30345	1.9344	30446.7
1.936	30260	1.936	30387.6
1.9376	30488	1.9376	30327.9
1.9392	30016	1.9392	30269.6
1.9408	30017	1.9408	30211.2
1.9424	30182	1.9424	30151.9
1.944	29838	1.944	30093.9
1.9456	29857	1.9456	30034.9
1.9472	29642	1.9472	29976.5
1.9488	29760	1.9488	29919.7
1.9504	30106	1.9504	29860.2
1.952	29709	1.952	29803.6
1.9536	29566	1.9536	29745.1
1.9552	29452	1.9552	29687
1.9568	30012	1.9568	29629.7
1.9584	29490	1.9584	29572.2
1.96	28913	1.96	29515.7
1.9616	29508	1.9616	29457.9
1.9632	29653	1.9632	29401.7
1.9648	29267	1.9648	29343.7
1.9664	28992	1.9664	29287.7
1.968	29118	1.968	29230.3
1.9696	29129	1.9696	29174.5
1.9712	29057	1.9712	29117.9
1.9728	28601	1.9728	29061.8
1.9744	29024	1.9744	29005.4
1.976	28885	1.976	28949.2
1.9776	28836	1.9776	28894.2
1.9792	28769	1.9792	28838.2
1.9808	28751	1.9808	28783.1
1.9824	28597	1.9824	28726.8
1.984	28731	1.984	28670.8
1.9856	28768	1.9856	28615.6
1.9872	28149	1.9872	28560.5
1.9888	28173	1.9888	28505.6
1.9904	28405	1.9904	28450.7
1.992	28220	1.992	28395.9
1.9936	28516	1.9936	28340.6
1.9952	28350	1.9952	28286.8
1.9968	27948	1.9968	28232.3
1.9984	28034	1.9984	28178.4
2	27823	2	28123.1
2.0016	28174	2.0016	28069.7
2.0032	28101	2.0032	28015.4
2.0048	27694	2.0048	27961.2
2.0064	27938	2.0064	27907.8
2.008	28075	2.008	27854.1
2.0096	27721	2.0096	27801
2.0112	27705	2.0112	27746.5
2.0128	27477	2.0128	27693.2
2.0144	27667	2.0144	27640.6
2.016	27326	2.016	27586.9
2.0176	27734	2.0176	27534.5
2.0192	27302	2.0192	27481.6
2.0208	27687	2.0208	27428.3
2.0224	27284	2.0224	27376.2
2.024	27129	2.024	27323.3
2.0256	27308	2.0256	27270.8
2.0272	27291	2.0272	27218.8
2.0288	26969	2.0288	27166.3
2.0304	26988	2.0304	27114.1
2.032	27162	2.032	27062.4
2.0336	27062	2.0336	27010.7
2.0352	26728	2.0352	26958.9
2.0368	26734	2.0368	26907.5
2.0384	26907	2.0384	26855.8
2.04	27131	2.04	26804.1
2.0416	26691	2.0416	26753
2.0432	26689	2.0432	26701.7
2.0448	26616	2.0448	26650.3
2.0464	26774	2.0464	26599.7
2.048	26518	2.048	26549
2.0496	26578	2.0496	26497.9
2.0512	26411	2.0512	26447.1
2.0528	26453	2.0528	26397.2
2.0544	26088	2.0544	26346.4
2.056	26244	2.056	26295.9
2.0576	26113	2.0576	26245.4
2.0592	26198	2.0592	26196
2.0608	26287	2.0608	26145.7
2.0624	26106	2.0624	26095.5
2.064	25764	2.064	26046
2.0656	25787	2.0656	25996
2.0672	25838	2.0672	25946.7
2.0688	25727	2.0688	25897.2
2.0704	25894	2.0704	25847.7
2.072	26227	2.072	25798.2
2.0736	25950	2.0736	25749.1
2.0752	25421	2.0752	25700.3
2.0768	25525	2.0768	25651.3
2.0784	25721	2.0784	25602.4
2.08	25642	2.08	25553.7
2.0816	25374	2.0816	25504.8
2.0832	25494	2.0832	25456.4
2.0848	25368	2.0848	25408
2.0864	25141	2.0864	25359.8
2.088	25258	2.088	25311.3
2.0896	25212	2.0896	25263.4
2.0912	25190	2.0912	25215.1
2.0928	25295	2.0928	25167.2
2.0944	25156	2.0944	25119.2
2.096	25061	2.096	25071.8
2.0976	24989	2.0976	25024.3
2.0992	24935	2.0992	24976.5
2.1008	24937	2.1008	24929.3
2.1024	24797	2.1024	24881.7
2.104	24883	2.104	24834.6
2.1056	24836	2.1056	24787.5
2.1072	24617	2.1072	24740.2
2.1088	24873	2.1088	24693.4
2.1104	24684	2.1104	24646.6
2.112	24629	2.112	24600
2.1136	24518	2.1136	24553.2
2.1152	24613	2.1152	24506.8
2.1168	24586	2.1168	24460.4
2.1184	24354	2.1184	24414.2
2.12	24414	2.12	24367.8
2.1216	24357	2.1216	24321.6
2.1232	24369	2.1232	24275.7
2.1248	24572	2.1248	24229.7
2.1264	24144	2.1264	24183.9
2.128	24172	2.128	24138.1
2.1296	24171	2.1296	24092.4
2.1312	23851	2.1312	24046.9
2.1328	23859	2.1328	24001.4
2.1344	24082	2.1344	23956.1
2.136	23852	2.136	23910.8
2.1376	23820	2.1376	23865.6
2.1392	23685	2.1392	23820.6
2.1408	23483	2.1408	23775.5
2.1424	23814	2.1424	23730.7
2.144	23663	2.144	23685.9
2.1456	23792	2.1456	23641.2
2.1472	23859	2.1472	23596.6
2.1488	23191	2.1488	23552.1
2.1504	23302	2.1504	23507.7
2.152	23648	2.152	23463.4
2.1536	23203	2.1536	23419.2
2.1552	23209	2.1552	23375
2.1568	23357	2.1568	23331
2.1584	23387	2.1584	23287
2.16	23140	2.16	23243.1
2.1616	23441	2.1616	23199.4
2.1632	23077	2.1632	23155.8
2.1648	23144	2.1648	23112.2
2.1664	23160	2.1664	23068.7
2.168	22725	2.168	23025.3
2.1696	23081	2.1696	22982.1
2.1712	22969	2.1712	22938.7
2.1728	22854	2.1728	22895.7
2.1744	22896	2.1744	22852.7
2.176	22686	2.176	22809.7
2.1776	22855	2.1776	22767
2.1792	22791	2.1792	22724
2.1808	22538	2.1808	22681.5
2.1824	22633	2.1824	22639
2.184	22701	2.184	22596.4
2.1856	22525	2.1856	22554
2.1872	22700	2.1872	22511.6
2.1888	22444	2.1888	22469.5
2.1904	22218	2.1904	22427.5
2.192	22126	2.192	22385.1
2.1936	22496	2.1936	22343.5
2.1952	22047	2.1952	22301.3
2.1968	22314	2.1968	22259.6
2.1984	22116	2.1984	22218.1
2.2	22387	2.2	22176.3
2.2016	22208	2.2016	22134.9
2.2032	21952	2.2032	22093.7
2.2048	22020	2.2048	22052.1
2.2064	22148	2.2064	22011
2.208	22068	2.208	21969.4
2.2096	21823	2.2096	21928.5
2.2112	22008	2.2112	21887.8
2.2128	21687	2.2128	21846.4
2.2144	21662	2.2144	21805.8
2.216	21875	2.216	21765.3
2.2176	22103	2.2176	21724.3
2.2192	21774	2.2192	21683.9
2.2208	21566	2.2208	21643.7
2.2224	21658	2.2224	21602.8
2.224	21571	2.224	21562.7
2.2256	21415	2.2256	21522.7
2.2272	21505	2.2272	21482
2.2288	21232	2.2288	21442.4
2.2304	21573	2.2304	21402.5
2.232	21406	2.232	21362
2.2336	21077	2.2336	21322.5
2.2352	21372	2.2352	21283.1
2.2368	21216	2.2368	21243.7
2.2384	21112	2.2384	21203.5
2.24	21187	2.24	21164.4
2.2416	21330	2.2416	21125.3
2.2432	21393	2.2432	21085.4
2.2448	20980	2.2448	21046.2
2.2464	21063	2.2464	21007.4
2.248	21180	2.248	20968.7
2.2496	21137	2.2496	20928.8
2.2512	20816	2.2512	20890.3
2.2528	20989	2.2528	20851.8
2.2544	20840	2.2544	20812.5
2.256	20883	2.256	20773.9
2.2576	20696	2.2576	20735.7
2.2592	20770	2.2592	20697.4
2.2608	20719	2.2608	20658.3
2.2624	20790	2.2624	20620
2.264	20916	2.264	20582.3
2.2656	20946	2.2656	20544.3
2.2672	20638	2.2672	20505.4
2.2688	20243	2.2688	20467.6
2.2704	20382	2.2704	20429.8
2.272	20424	2.272	20392.1
2.2736	20412	2.2736	20353.9
2.2752	20374	2.2752	20316.4
2.2768	20307	2.2768	20279
2.2784	20121	2.2784	20241.2
2.28	20578	2.28	20204.4
2.2816	20191	2.2816	20166.2
2.2832	20152	2.2832	20129.1
2.2848	20107	2.2848	20092.1
2.2864	20029	2.2864	20055.2
2.288	20140	2.288	20017
2.2896	20073	2.2896	19980.6
2.2912	20078	2.2912	19943.8
2.2928	19898	2.2928	19906.9
2.2944	19884	2.2944	19870.4
2.296	19819	2.296	19833
2.2976	19731	2.2976	19796.6
2.2992	19565	2.2992	19759.9
2.3008	19787	2.3008	19724.1
2.3024	19744	2.3024	19687.7
2.304	19630	2.304	19651.7
2.3056	19383	2.3056	19614.7
2.3072	19462	2.3072	19578.4
2.3088	19475	2.3088	19542.6
2.3104	19452	2.3104	19507
2.312	19748	2.312	19471
2.3136	19469	2.3136	19435.4
2.3152	19209	2.3152	19398.4
2.3168	18997	2.3168	19363.1
2.3184	19071	2.3184	19327.3
2.32	19476	2.32	19292.1
2.3216	19373	2.3216	19257.1
2.3232	18867	2.3232	19221.7
2.3248	19622	2.3248	19186.2
2.3264	19335	2.3264	19150.1
2.328	19098	2.328	19114.9
2.3296	18963	2.3296	19079.7
2.3312	18952	2.3312	19045.1
2.3328	18763	2.3328	19010.7
2.3344	18949	2.3344	18975.6
2.336	18932	2.336	18941.4
2.3376	19184	2.3376	18906.2
2.3392	18700	2.3392	18871.4
2.3408	19186	2.3408	18836
2.3424	18859	2.3424	18801.5
2.344	18921	2.344	18766.9
2.3456	19065	2.3456	18733.1
2.3472	18671	2.3472	18698.9
2.3488	18725	2.3488	18664.5
2.3504	18682	2.3504	18631
2.352	18748	2.352	18596.5
2.3536	18625	2.3536	18562.4
2.3552	18278	2.3552	18528.6
2.3568	18550	2.3568	18494.8
2.3584	18402	2.3584	18461
2.36	18013	2.36	18425.6
2.3616	18680	2.3616	18392.6
2.3632	18505	2.3632	18358.7
2.3648	18340	2.3648	18325.1
2.3664	18203	2.3664	18291.8
2.368	18261	2.368	18258.6
2.3696	18346	2.3696	18225.8
2.3712	18202	2.3712	18192.2
2.3728	18115	2.3728	18158.6
2.3744	17900	2.3744	18126
2.376	18166	2.376	18093.1
2.3776	18115	2.3776	18059.6
2.3792	17975	2.3792	18027.2
2.3808	18149	2.3808	17994.6
2.3824	17760	2.3824	17961
2.384	18135	2.384	17928.8
2.3856	18098	2.3856	17896.5
2.3872	17968	2.3872	17863.1
2.3888	17683	2.3888	17831.1
2.3904	17972	2.3904	17797.8
2.392	17732	2.392	17765.7
2.3936	17850	2.3936	17733.9
2.3952	17899	2.3952	17700.8
2.3968	17733	2.3968	17668.9
2.3984	17836	2.3984	17636.6
2.4	17518	2.4	17605
2.4016	17721	2.4016	17572.6
2.4032	17452	2.4032	17540.7
2.4048	17585	2.4048	17509
2.4064	17502	2.4064	17476.6
2.408	17396	2.408	17445.6
2.4096	17470	2.4096	17414
2.4112	17521	2.4112	17382.5
2.4128	17232	2.4128	17351
2.4144	17239	2.4144	17319
2.416	17558	2.416	17288.3
2.4176	17470	2.4176	17256.4
2.4192	17530	2.4192	17225.1
2.4208	17476	2.4208	17194
2.4224	17417	2.4224	17162.9
2.424	17006	2.424	17130.9
2.4256	17140	2.4256	17100.9
2.4272	16890	2.4272	17069.5
2.4288	17203	2.4288	17039.3
2.4304	17174	2.4304	17007.9
2.432	17211	2.432	16977.1
2.4336	16920	2.4336	16946.5
2.4352	17020	2.4352	16915.9
2.4368	16829	2.4368	16884.8
2.4384	16953	2.4384	16855.2
2.44	17023	2.44	16824
2.4416	16844	2.4416	16793.5
2.4432	16762	2.4432	16763.5
2.4448	16630	2.4448	16733.3
2.4464	16395	2.4464	16703.5
2.448	16760	2.448	16672.5
2.4496	16589	2.4496	16642.5
2.4512	16550	2.4512	16612.9
2.4528	16659	2.4528	16582.7
2.4544	16099	2.4544	16552.4
2.456	16377	2.456	16523.5
2.4576	16367	2.4576	16493.2
2.4592	16464	2.4592	16463.8
2.4608	16490	2.4608	16434.3
2.4624	16487	2.4624	16403.9
2.464	16563	2.464	16374.6
2.4656	16178	2.4656	16345
2.4672	16450	2.4672	16315.3
2.4688	16473	2.4688	16286.7
2.4704	16023	2.4704	16256.8
2.472	16260	2.472	16228
2.4736	16180	2.4736	16198.9
2.4752	16168	2.4752	16169.2
2.4768	16266	2.4768	16140.6
2.4784	16189	2.4784	16111.3
2.48	16015	2.48	16083.1
2.4816	15971	2.4816	16053.9
2.4832	15969	2.4832	16024.9
2.4848	16054	2.4848	15996.4
2.4864	15977	2.4864	15967.2
2.488	16094	2.488	15939.5
2.4896	16118	2.4896	15910.4
2.4912	15940	2.4912	15881.3
2.4928	15812	2.4928	15853.7
2.4944	15861	2.4944	15824.8
2.496	15863	2.496	15796.8
2.4976	15749	2.4976	15768
2.4992	15943	2.4992	15739.8
2.5008	15653	2.5008	15712.3
2.5024	15508	2.5024	15683.6
2.504	15682	2.504	15655.9
2.5056	15173	2.5056	15627.8
2.5072	15457	2.5072	15599.3
2.5088	15633	2.5088	15571.8
2.5104	15728	2.5104	15543.4
2.512	15600	2.512	15516.9
2.5136	15268	2.5136	15488.6
2.5152	15486	2.5152	15460.3
2.5168	15535	2.5168	15433.4
2.5184	15594	2.5184	15405.3
2.52	15303	2.52	15378.6
2.5216	15320	2.5216	15350.6
2.5232	15244	2.5232	15322.7
2.5248	15299	2.5248	15296
2.5264	15410	2.5264	15268.2
2.528	15295	2.528	15241.7
2.5296	15081	2.5296	15214
2.5312	15239	2.5312	15186.5
2.5328	15263	2.5328	15159.9
2.5344	15340	2.5344	15132.6
2.536	15078	2.536	15106.1
2.5376	15154	2.5376	15079.2
2.5392	15453	2.5392	15053
2.5408	14957	2.5408	15025.8
2.5424	15065	2.5424	14998.5
2.544	14800	2.544	14972.5
2.5456	14906	2.5456	14945.5
2.5472	15069	2.5472	14919.4
2.5488	15056	2.5488	14892.5
2.5504	14994	2.5504	14865.1
2.552	14839	2.552	14839.4
2.5536	14894	2.5536	14812.6
2.5552	14831	2.5552	14787.1
2.5568	14896	2.5568	14760.3
2.5584	14808	2.5584	14734.8
2.56	14543	2.56	14708.2
2.5616	14717	2.5616	14681.6
2.5632	14580	2.5632	14656.2
2.5648	14489	2.5648	14629.8
2.5664	14795	2.5664	14604.6
2.568	14466	2.568	14578.2
2.5696	14588	2.5696	14553.1
2.5712	14607	2.5712	14526.8
2.5728	14594	2.5728	14500.6
2.5744	14419	2.5744	14475.7
2.576	14413	2.576	14449.5
2.5776	14464	2.5776	14424.3
2.5792	14494	2.5792	14398.3
2.5808	14412	2.5808	14373.6
2.5824	14213	2.5824	14347.7
2.584	14431	2.584	14323
2.5856	14415	2.5856	14297.2
2.5872	14423	2.5872	14271.5
2.5888	14299	2.5888	14246.6
2.5904	14016	2.5904	14221
2.592	14301	2.592	14196.6
2.5936	14259	2.5936	14171.1
2.5952	14176	2.5952	14146.8
2.5968	14185	2.5968	14121.4
2.5984	14056	2.5984	14096.8
2.6	14085	2.6	14071.5
2.6016	14115	2.6016	14046.2
2.6032	14093	2.6032	14022.2
2.6048	14124	2.6048	13997
2.6064	13993	2.6064	13973.2
2.608	13826	2.608	13947.6
2.6096	13877	2.6096	13923.9
2.6112	14067	2.6112	13898.8
2.6128	13744	2.6128	13875.2
2.6144	14007	2.6144	13850.3
2.616	13936	2.616	13825
2.6176	13884	2.6176	13801.6
2.6192	13755	2.6192	13777
2.6208	13724	2.6208	13753.3
2.6224	13737	2.6224	13729.1
2.624	13836	2.624	13704.2
2.6256	13509	2.6256	13680.6
2.6272	13652	2.6272	13656.5
2.6288	13569	2.6288	13632.6
2.6304	13850	2.6304	13608.5
2.632	13709	2.632	13584.8
2.6336	13633	2.6336	13561.4
2.6352	13799	2.6352	13537.5
2.6368	13457	2.6368	13513.4
2.6384	13552	2.6384	13489.6
2.64	13465	2.64	13466
2.6416	13553	2.6416	13442.6
2.6432	13232	2.6432	13418.8
2.6448	13357	2.6448	13395.8
2.6464	13333	2.6464	13372.3
2.648	13515	2.648	13348.5
2.6496	13260	2.6496	13325.3
2.6512	13443	2.6512	13301.7
2.6528	13231	2.6528	13278.6
2.6544	13151	2.6544	13255.8
2.656	13210	2.656	13232.5
2.6576	13335	2.6576	13209
2.6592	13307	2.6592	13186
2.6608	13292	2.6608	13162.8
2.6624	13143	2.6624	13140.3
2.664	13054	2.664	13117.5
2.6656	13231	2.6656	13094.3
2.6672	13199	2.6672	13071.6
2.6688	12911	2.6688	13048.5
2.6704	13199	2.6704	13025.9
2.672	13140	2.672	13003.2
2.6736	12996	2.6736	12980.6
2.6752	12953	2.6752	12957.8
2.6768	13061	2.6768	12935.7
2.6784	12868	2.6784	12912.9
2.68	12829	2.68	12890.1
2.6816	12883	2.6816	12867.8
2.6832	12755	2.6832	12845.4
2.6848	12829	2.6848	12823.2
2.6864	12843	2.6864	12801
2.688	12724	2.688	12778.4
2.6896	12730	2.6896	12755.9
2.6912	12554	2.6912	12734.2
2.6928	12835	2.6928	12712.2
2.6944	12781	2.6944	12690.1
2.696	12691	2.696	12667.4
2.6976	12587	2.6976	12645.8
2.6992	12534	2.6992	12624.1
2.7008	12764	2.7008	12601.7
2.7024	12543	2.7024	12580.4
2.704	12501	2.704	12558.3
2.7056	12532	2.7056	12536.5
2.7072	12735	2.7072	12514.5
2.7088	12580	2.7088	12493.2
2.7104	12485	2.7104	12471.7
2.712	12369	2.712	12450.1
2.7136	12472	2.7136	12427.9
2.7152	12499	2.7152	12406.8
2.7168	12518	2.7168	12385.2
2.7184	12312	2.7184	12364.2
2.72	12376	2.72	12342.5
2.7216	12107	2.7216	12320.9
2.7232	12431	2.7232	12299.6
2.7248	12177	2.7248	12278.9
2.7264	12302	2.7264	12257.6
2.728	12246	2.728	12235.7
2.7296	12324	2.7296	12215
2.7312	12192	2.7312	12194
2.7328	12229	2.7328	12172.9
2.7344	12164	2.7344	12151.8
2.736	12050	2.736	12130.5
2.7376	12273	2.7376	12109.7
2.7392	12101	2.7392	12089.2
2.7408	12032	2.7408	12068.3
2.7424	12164	2.7424	12047.4
2.744	12099	2.744	12026.3
2.7456	11829	2.7456	12005.8
2.7472	12028	2.7472	11985.3
2.7488	11808	2.7488	11964.9
2.7504	11901	2.7504	11943.9
2.752	11925	2.752	11923.3
2.7536	11973	2.7536	11902.7
2.7552	11899	2.7552	11882.5
2.7568	12035	2.7568	11862.2
2.7584	11875	2.7584	11841.5
2.76	11751	2.76	11821.5
2.7616	11832	2.7616	11800.7
2.7632	11742	2.7632	11780.7
2.7648	11627	2.7648	11760.2
2.7664	11699	2.7664	11740
2.768	11893	2.768	11720.3
2.7696	11840	2.7696	11700.2
2.7712	11665	2.7712	11679.8
2.7728	11725	2.7728	11659.5
2.7744	11735	2.7744	11639.5
2.776	11658	2.776	11619.8
2.7776	11648	2.7776	11599.6
2.7792	11615	2.7792	11580
2.7808	11579	2.7808	11560.4
2.7824	11498	2.7824	11540.9
2.784	11489	2.784	11520.9
2.7856	11617	2.7856	11500.5
2.7872	11458	2.7872	11480.9
2.7888	11259	2.7888	11461.3
2.7904	11421	2.7904	11441.7
2.792	11538	2.792	11422.2
2.7936	11494	2.7936	11402.9
2.7952	11503	2.7952	11383.5
2.7968	11227	2.7968	11363.8
2.7984	11486	2.7984	11344.7
2.8	11379	2.8	11325.4
2.8016	11399	2.8016	11306.2
2.8032	11252	2.8032	11285.9
2.8048	11445	2.8048	11267
2.8064	11218	2.8064	11247.5
2.808	11497	2.808	11228.4
2.8096	11354	2.8096	11209.4
2.8112	11237	2.8112	11190.3
2.8128	11207	2.8128	11171.3
2.8144	11176	2.8144	11152.1
2.816	11289	2.816	11133.2
2.8176	10999	2.8176	11114.6
2.8192	10929	2.8192	11095.5
2.8208	10983	2.8208	11076.7
2.8224	11031	2.8224	11057.3
2.824	11112	2.824	11039
2.8256	10965	2.8256	11019.9
2.8272	11050	2.8272	11001.1
2.8288	11098	2.8288	10982.9
2.8304	11022	2.8304	10964.1
2.832	10889	2.832	10945
2.8336	11136	2.8336	10926.8
2.8352	10782	2.8352	10908.4
2.8368	10850	2.8368	10889.4
2.8384	10947	2.8384	10871.4
2.84	10896	2.84	10852.6
2.8416	10695	2.8416	10834.1
2.8432	10977	2.8432	10815.9
2.8448	10686	2.8448	10797.5
2.8464	10635	2.8464	10779.4
2.848	10728	2.848	10760.8
2.8496	10959	2.8496	10742.7
2.8512	10694	2.8512	10724.7
2.8528	10864	2.8528	10706.2
2.8544	10843	2.8544	10688.2
2.856	10699	2.856	10670.1
2.8576	10572	2.8576	10652
2.8592	10737	2.8592	10633.8
2.8608	10667	2.8608	10616.2
2.8624	10654	2.8624	10598.2
2.864	10573	2.864	10580.2
2.8656	10630	2.8656	10562.2
2.8672	10691	2.8672	10544.5
2.8688	10619	2.8688	10526.8
2.8704	10506	2.8704	10508.7
2.872	10533	2.872	10491.3
2.8736	10559	2.8736	10473.1
2.8752	10458	2.8752	10455.7
2.8768	10529	2.8768	10438.2
2.8784	10373	2.8784	10420.3
2.88	10496	2.88	10402.8
2.8816	10290	2.8816	10385.6
2.8832	10329	2.8832	10367.6
2.8848	10363	2.8848	10350.4
2.8864	10409	2.8864	10333.1
2.888	10468	2.888	10315.6
2.8896	10352	2.8896	10298.1
2.8912	10189	2.8912	10280.8
2.8928	10407	2.8928	10263.4
2.8944	10196	2.8944	10246.2
2.896	10217	2.896	10229.1
2.8976	10188	2.8976	10211.6
2.8992	10259	2.8992	10194.6
2.9008	10163	2.9008	10177.4
2.9024	9913	2.9024	10160.2
2.904	10336	2.904	10143.4
2.9056	10171	2.9056	10126.3
2.9072	10241	2.9072	10109.3
2.9088	10010	2.9088	10092.4
2.9104	10146	2.9104	10075
2.912	10172	2.912	10058.3
2.9136	10328	2.9136	10041.5
2.9152	9947	2.9152	10024.7
2.9168	10162	2.9168	10007.8
2.9184	9925	2.9184	9991.08
2.92	10141	2.92	9974.4
2.9216	9987	2.9216	9957.56
2.9232	10034	2.9232	9940.92
2.9248	10165	2.9248	9924.31
2.9264	9933	2.9264	9907.75
2.928	9962	2.928	9890.91
2.9296	10000	2.9296	9874.67
2.9312	9832	2.9312	9858.19
2.9328	9818	2.9328	9841.45
2.9344	9876	2.9344	9825.15
2.936	9938	2.936	9808.77
2.9376	9715	2.9376	9792.28
2.9392	9923	2.9392	9776.05
2.9408	9799	2.9408	9759.63
2.9424	9692	2.9424	9743.36
2.944	9946	2.944	9727.11
2.9456	9727	2.9456	9710.79
2.9472	9686	2.9472	9694.58
2.9488	9569	2.9488	9678.54
2.9504	9852	2.9504	9662.32
2.952	9744	2.952	9646.22
2.9536	9592	2.9536	9630.13
2.9552	9671	2.9552	9614.12
2.9568	9452	2.9568	9598.11
2.9584	9582	2.9584	9582.02
2.96	9531	2.96	9566.2
2.9616	9667	2.9616	9550.16
2.9632	9603	2.9632	9534.27
2.9648	9721	2.9648	9518.63
2.9664	9584	2.9664	9502.6
2.968	9432	2.968	9486.88
2.9696	9532	2.9696	9471.03
2.9712	9620	2.9712	9455.29
2.9728	9360	2.9728	9439.76
2.9744	9480	2.9744	9423.91
2.976	9577	2.976	9408.33
2.9776	9402	2.9776	9392.62
2.9792	9572	2.9792	9377.13
2.9808	9337	2.9808	9361.57
2.9824	9271	2.9824	9345.92
2.984	9445	2.984	9330.51
2.9856	9300	2.9856	9315.03
2.9872	9257	2.9872	9299.59
2.9888	9250	2.9888	9284.26
2.9904	9240	2.9904	9268.79
2.992	9310	2.992	9253.5
2.9936	9076	2.9936	9238.08
2.9952	9363	2.9952	9222.81
2.9968	9235	2.9968	9207.56
2.9984	9176	2.9984	9192.38
3	9228	3	9177.2
3.0016	9216	3.0016	9162
3.0032	9147	3.0032	9146.88
3.0048	9230	3.0048	9131.65
3.0064	9176	3.0064	9116.61
3.008	9095	3.008	9101.53
3.0096	9175	3.0096	9086.51
3.0112	9013	3.0112	9071.53
3.0128	8953	3.0128	9056.54
3.0144	9126	3.0144	9041.65
3.016	9087	3.016	9026.62
3.0176	9057	3.0176	9011.75
3.0192	8936	3.0192	8996.89
3.0208	8964	3.0208	8982.09
3.0224	9063	3.0224	8967.27
3.024	9103	3.024	8952.52
3.0256	9114	3.0256	8937.78
3.0272	8961	3.0272	8923.04
3.0288	8938	3.0288	8908.39
3.0304	8909	3.0304	8893.71
3.032	9035	3.032	8879.08
3.0336	9007	3.0336	8864.44
3.0352	8873	3.0352	8849.88
3.0368	8668	3.0368	8835.31
3.0384	8786	3.0384	8820.8
3.04	8807	3.04	8806.31
3.0416	8804	3.0416	8791.84
3.0432	8651	3.0432	8777.38
3.0448	8721	3.0448	8763
3.0464	8882	3.0464	8748.62
3.048	8911	3.048	8734.23
3.0496	8631	3.0496	8719.93
3.0512	8608	3.0512	8705.6
3.0528	8724	3.0528	8691.35
3.0544	8678	3.0544	8677.11
3.056	8780	3.056	8662.86
3.0576	8650	3.0576	8648.67
3.0592	8606	3.0592	8634.51
3.0608	8675	3.0608	8620.38
3.0624	8837	3.0624	8606.22
3.064	8715	3.064	8592.16
3.0656	8436	3.0656	8578.08
3.0672	8596	3.0672	8564.05
3.0688	8615	3.0688	8550.09
3.0704	8468	3.0704	8536.06
3.072	8513	3.072	8522.12
3.0736	8599	3.0736	8508.16
3.0752	8530	3.0752	8494.29
3.0768	8556	3.0768	8480.46
3.0784	8357	3.0784	8466.53
3.08	8579	3.08	8452.77
3.0816	8427	3.0816	8438.9
3.0832	8510	3.0832	8425.17
3.0848	8546	3.0848	8411.49
3.0864	8387	3.0864	8397.68
3.088	8415	3.088	8384.01
3.0896	8253	3.0896	8370.33
3.0912	8569	3.0912	8356.72
3.0928	8251	3.0928	8343.12
3.0944	8302	3.0944	8329.48
3.096	8232	3.096	8315.97
3.0976	8287	3.0976	8302.47
3.0992	8240	3.0992	8288.87
3.1008	8346	3.1008	8275.42
3.1024	8304	3.1024	8261.88
3.104	8347	3.104	8248.48
3.1056	8369	3.1056	8235.12
3.1072	8225	3.1072	8221.62
3.1088	8355	3.1088	8208.35
3.1104	8173	3.1104	8195.05
3.112	8166	3.112	8181.62
3.1136	8292	3.1136	8168.37
3.1152	8121	3.1152	8155.25
3.1168	7942	3.1168	8141.88
3.1184	8239	3.1184	8128.7
3.12	8304	3.12	8115.54
3.1216	8195	3.1216	8102.35
3.1232	8194	3.1232	8089.22
3.1248	8065	3.1248	8076.17
3.1264	8174	3.1264	8063.02
3.128	8151	3.128	8049.97
3.1296	8133	3.1296	8036.96
3.1312	8007	3.1312	8023.81
3.1328	8193	3.1328	8010.92
3.1344	7975	3.1344	7998.02
3.136	8051	3.136	7985.11
3.1376	7947	3.1376	7972
3.1392	7921	3.1392	7959.3
3.1408	7827	3.1408	7946.46
3.1424	7892	3.1424	7933.43
3.144	8044	3.144	7920.72
3.1456	7917	3.1456	7907.96
3.1472	8001	3.1472	7895.27
3.1488	7827	3.1488	7882.28
3.1504	7976	3.1504	7869.76
3.152	7856	3.152	7857.07
3.1536	7958	3.1536	7844.21
3.1552	7789	3.1552	7831.54
3.1568	7780	3.1568	7819.1
3.1584	7858	3.1584	7806.5
3.16	7966	3.16	7793.62
3.1616	8057	3.1616	7781.34
3.1632	7685	3.1632	7768.83
3.1648	7788	3.1648	7756.24
3.1664	7932	3.1664	7743.57
3.168	7825	3.168	7731.29
3.1696	7696	3.1696	7718.84
3.1712	7742	3.1712	7706.47
3.1728	7587	3.1728	7694.25
3.1744	7720	3.1744	7681.58
3.176	7692	3.176	7669.29
3.1776	7580	3.1776	7657
3.1792	7585	3.1792	7644.88
3.1808	7545	3.1808	7632.32
3.1824	7552	3.1824	7620.07
3.184	7646	3.184	7607.98
3.1856	7510	3.1856	7595.77
3.1872	7669	3.1872	7583.64
3.1888	7616	3.1888	7571.34
3.1904	7739	3.1904	7559.25
3.192	7672	3.192	7547.1
3.1936	7650	3.1936	7534.99
3.1952	7466	3.1952	7523.11
3.1968	7518	3.1968	7511.07
[truncated: 27,026 more rows]

## Sheet: Fig3c
Time[µs]	Intensity[Cnts]	Time[µs]	Fit
0	13	0	---
0.0032	147	0.0032	---
0.0064	878	0.0064	---
0.0096	810	0.0096	---
0.0128	738	0.0128	---
0.016	747	0.016	---
0.0192	723	0.0192	---
0.0224	751	0.0224	---
0.0256	786	0.0256	---
0.0288	1106	0.0288	---
0.032	1602	0.032	---
0.0352	1517	0.0352	---
0.0384	1647	0.0384	---
0.0416	1511	0.0416	---
0.0448	1528	0.0448	---
0.048	1412	0.048	---
0.0512	1429	0.0512	---
0.0544	1969	0.0544	---
0.0576	2348	0.0576	---
0.0608	2421	0.0608	---
0.064	2271	0.064	---
0.0672	2221	0.0672	---
0.0704	2300	0.0704	---
0.0736	2107	0.0736	---
0.0768	2224	0.0768	---
0.08	2875	0.08	---
0.0832	3071	0.0832	---
0.0864	2981	0.0864	---
0.0896	2913	0.0896	---
0.0928	2857	0.0928	---
0.096	2910	0.096	---
0.0992	2934	0.0992	---
0.1024	2885	0.1024	---
0.1056	3648	0.1056	---
0.1088	3784	0.1088	---
0.112	3669	0.112	---
0.1152	3526	0.1152	---
0.1184	3493	0.1184	---
0.1216	3532	0.1216	---
0.1248	3605	0.1248	---
0.128	3493	0.128	---
0.1312	4472	0.1312	---
0.1344	4291	0.1344	---
0.1376	4194	0.1376	---
0.1408	4204	0.1408	---
0.144	4191	0.144	---
0.1472	4281	0.1472	---
0.1504	4242	0.1504	---
0.1536	4438	0.1536	---
0.1568	5096	0.1568	---
0.16	4908	0.16	---
0.1632	4981	0.1632	---
0.1664	4765	0.1664	---
0.1696	4709	0.1696	---
0.1728	4701	0.1728	---
0.176	4693	0.176	---
0.1792	5213	0.1792	---
0.1824	5645	0.1824	---
0.1856	5542	0.1856	---
0.1888	5464	0.1888	---
0.192	5405	0.192	---
0.1952	5362	0.1952	---
0.1984	5406	0.1984	---
0.2016	5328	0.2016	---
0.2048	5845	0.2048	---
0.208	6197	0.208	---
0.2112	6079	0.2112	---
0.2144	5990	0.2144	---
0.2176	5980	0.2176	---
0.2208	5857	0.2208	---
0.224	5790	0.224	---
0.2272	5880	0.2272	---
0.2304	6655	0.2304	---
0.2336	6901	0.2336	---
0.2368	6713	0.2368	---
0.24	6684	0.24	---
0.2432	6379	0.2432	---
0.2464	6361	0.2464	---
0.2496	6509	0.2496	---
0.2528	6375	0.2528	---
0.256	7479	0.256	---
0.2592	7246	0.2592	---
0.2624	7342	0.2624	---
0.2656	7176	0.2656	---
0.2688	7181	0.2688	---
0.272	6937	0.272	---
0.2752	6958	0.2752	---
0.2784	7142	0.2784	---
0.2816	7899	0.2816	---
0.2848	7810	0.2848	---
0.288	7582	0.288	---
0.2912	7449	0.2912	---
0.2944	7630	0.2944	---
0.2976	7572	0.2976	---
0.3008	7508	0.3008	---
0.304	7984	0.304	---
0.3072	8489	0.3072	---
0.3104	8174	0.3104	---
0.3136	8019	0.3136	---
0.3168	8179	0.3168	---
0.32	8063	0.32	---
0.3232	7906	0.3232	---
0.3264	7932	0.3264	---
0.3296	8720	0.3296	---
0.3328	8835	0.3328	---
0.336	8882	0.336	---
0.3392	8661	0.3392	---
0.3424	8642	0.3424	---
0.3456	8459	0.3456	---
0.3488	8369	0.3488	---
0.352	8363	0.352	---
0.3552	9117	0.3552	---
0.3584	9099	0.3584	---
0.3616	9158	0.3616	---
0.3648	9031	0.3648	---
0.368	9005	0.368	---
0.3712	8959	0.3712	---
0.3744	8907	0.3744	---
0.3776	8835	0.3776	---
0.3808	9931	0.3808	---
0.384	9579	0.384	---
0.3872	9613	0.3872	---
0.3904	9430	0.3904	---
0.3936	9317	0.3936	---
0.3968	9329	0.3968	---
0.4	9165	0.4	---
0.4032	9246	0.4032	---
0.4064	10434	0.4064	---
0.4096	10123	0.4096	---
0.4128	9974	0.4128	---
0.416	9807	0.416	---
0.4192	9617	0.4192	---
0.4224	9723	0.4224	---
0.4256	9812	0.4256	---
0.4288	9870	0.4288	---
0.432	10682	0.432	---
0.4352	10404	0.4352	---
0.4384	10387	0.4384	---
0.4416	10197	0.4416	---
0.4448	10290	0.4448	---
0.448	9975	0.448	---
0.4512	10082	0.4512	---
0.4544	10728	0.4544	---
0.4576	10791	0.4576	---
0.4608	10955	0.4608	---
0.464	10529	0.464	---
0.4672	10539	0.4672	---
0.4704	10540	0.4704	---
0.4736	10540	0.4736	---
0.4768	10232	0.4768	---
0.48	11050	0.48	---
0.4832	11205	0.4832	---
0.4864	11100	0.4864	---
0.4896	10859	0.4896	---
0.4928	10825	0.4928	---
0.496	10869	0.496	---
0.4992	10626	0.4992	---
0.5024	10621	0.5024	---
0.5056	11568	0.5056	---
0.5088	11629	0.5088	---
0.512	11562	0.512	---
0.5152	11200	0.5152	---
0.5184	11288	0.5184	---
0.5216	11078	0.5216	---
0.5248	11034	0.5248	---
0.528	11011	0.528	---
0.5312	12038	0.5312	---
0.5344	11752	0.5344	---
0.5376	11500	0.5376	---
0.5408	11536	0.5408	---
0.544	11518	0.544	---
0.5472	11333	0.5472	---
0.5504	11355	0.5504	---
0.5536	11492	0.5536	---
0.5568	12330	0.5568	---
0.56	12017	0.56	---
0.5632	11998	0.5632	---
0.5664	11827	0.5664	---
0.5696	11656	0.5696	---
0.5728	11601	0.5728	---
0.576	11687	0.576	---
0.5792	12228	0.5792	---
0.5824	12565	0.5824	---
0.5856	12270	0.5856	---
0.5888	12166	0.5888	---
0.592	12201	0.592	---
0.5952	11998	0.5952	---
0.5984	11999	0.5984	---
0.6016	11937	0.6016	---
0.6048	12394	0.6048	---
0.608	12749	0.608	---
0.6112	12426	0.6112	---
0.6144	12534	0.6144	---
0.6176	12450	0.6176	---
0.6208	12248	0.6208	---
0.624	12262	0.624	---
0.6272	12018	0.6272	---
0.6304	12968	0.6304	---
0.6336	12911	0.6336	---
0.6368	12742	0.6368	---
0.64	12725	0.64	---
0.6432	12445	0.6432	---
0.6464	12446	0.6464	---
0.6496	12373	0.6496	---
0.6528	12427	0.6528	---
0.656	13455	0.656	---
0.6592	13219	0.6592	---
0.6624	12975	0.6624	---
0.6656	12777	0.6656	---
0.6688	12866	0.6688	---
0.672	12683	0.672	---
0.6752	12596	0.6752	---
0.6784	12692	0.6784	---
0.6816	13617	0.6816	---
0.6848	13264	0.6848	---
0.688	13139	0.688	---
0.6912	13188	0.6912	---
0.6944	13042	0.6944	---
0.6976	13011	0.6976	---
0.7008	13061	0.7008	---
0.704	13497	0.704	---
0.7072	13825	0.7072	---
0.7104	13325	0.7104	---
0.7136	13351	0.7136	---
0.7168	13148	0.7168	---
0.72	13288	0.72	---
0.7232	13082	0.7232	---
0.7264	13454	0.7264	---
0.7296	13661	0.7296	---
0.7328	14085	0.7328	---
0.736	13727	0.736	---
0.7392	13663	0.7392	---
0.7424	13530	0.7424	---
0.7456	13366	0.7456	---
0.7488	13367	0.7488	---
0.752	13236	0.752	---
0.7552	14109	0.7552	---
0.7584	14017	0.7584	---
0.7616	13978	0.7616	---
0.7648	13635	0.7648	---
0.768	13793	0.768	---
0.7712	13435	0.7712	---
0.7744	13603	0.7744	---
0.7776	13493	0.7776	---
0.7808	14368	0.7808	---
0.784	14089	0.784	---
0.7872	14183	0.7872	---
0.7904	13973	0.7904	---
0.7936	14143	0.7936	---
0.7968	13714	0.7968	---
0.8	13789	0.8	---
0.8032	13726	0.8032	---
0.8064	14492	0.8064	---
0.8096	14557	0.8096	---
0.8128	14436	0.8128	---
0.816	14288	0.816	---
0.8192	14098	0.8192	---
0.8224	13824	0.8224	---
0.8256	13868	0.8256	---
0.8288	14101	0.8288	---
0.832	14623	0.832	---
0.8352	14616	0.8352	---
0.8384	14435	0.8384	---
0.8416	14163	0.8416	---
0.8448	14164	0.8448	---
0.848	14055	0.848	---
0.8512	14105	0.8512	---
0.8544	14476	0.8544	---
0.8576	14778	0.8576	---
0.8608	14964	0.8608	---
0.864	14842	0.864	---
0.8672	14370	0.8672	---
0.8704	14070	0.8704	---
0.8736	14121	0.8736	---
0.8768	14064	0.8768	---
0.88	14849	0.88	---
0.8832	14937	0.8832	---
0.8864	14889	0.8864	---
0.8896	14975	0.8896	---
0.8928	14472	0.8928	---
0.896	14437	0.896	---
0.8992	14380	0.8992	---
0.9024	14282	0.9024	---
0.9056	15228	0.9056	---
0.9088	15090	0.9088	---
0.912	14858	0.912	---
0.9152	14731	0.9152	---
0.9184	14665	0.9184	---
0.9216	14589	0.9216	---
0.9248	14356	0.9248	---
0.928	14318	0.928	---
0.9312	15190	0.9312	---
0.9344	15299	0.9344	---
0.9376	15324	0.9376	---
0.9408	15020	0.9408	---
0.944	14739	0.944	---
0.9472	14475	0.9472	---
0.9504	14539	0.9504	---
0.9536	14909	0.9536	---
0.9568	15318	0.9568	---
0.96	15257	0.96	---
0.9632	15282	0.9632	---
0.9664	14580	0.9664	---
0.9696	14830	0.9696	---
0.9728	14716	0.9728	---
0.976	14901	0.976	---
0.9792	14966	0.9792	---
0.9824	15539	0.9824	---
0.9856	15442	0.9856	---
0.9888	15194	0.9888	---
0.992	15040	0.992	---
0.9952	15240	0.9952	---
0.9984	15093	0.9984	---
1.0016	14945	1.0016	---
1.0048	15257	1.0048	---
1.008	15588	1.008	---
1.0112	15561	1.0112	---
1.0144	15444	1.0144	---
1.0176	15261	1.0176	---
1.0208	15255	1.0208	---
1.024	15074	1.024	---
1.0272	15127	1.0272	---
1.0304	15700	1.0304	---
1.0336	15791	1.0336	---
1.0368	15487	1.0368	---
1.04	15286	1.04	---
1.0432	15320	1.0432	---
1.0464	15160	1.0464	---
1.0496	15090	1.0496	---
1.0528	15156	1.0528	---
1.056	16390	1.056	---
1.0592	15787	1.0592	---
1.0624	15727	1.0624	---
1.0656	15380	1.0656	---
1.0688	15679	1.0688	---
1.072	15430	1.072	---
1.0752	15271	1.0752	---
1.0784	15830	1.0784	---
1.0816	16247	1.0816	---
1.0848	15829	1.0848	---
1.088	15590	1.088	---
1.0912	15619	1.0912	---
1.0944	15558	1.0944	---
1.0976	15541	1.0976	---
1.1008	15399	1.1008	---
1.104	15852	1.104	---
1.1072	16090	1.1072	---
1.1104	15980	1.1104	---
1.1136	15849	1.1136	---
1.1168	15941	1.1168	---
1.12	15644	1.12	---
1.1232	15464	1.1232	---
1.1264	15488	1.1264	---
1.1296	16033	1.1296	---
1.1328	16332	1.1328	---
1.136	16022	1.136	---
1.1392	15860	1.1392	---
1.1424	15731	1.1424	---
1.1456	15889	1.1456	---
1.1488	15787	1.1488	---
1.152	15483	1.152	---
1.1552	16205	1.1552	---
1.1584	16426	1.1584	---
1.1616	16129	1.1616	---
1.1648	16113	1.1648	---
1.168	16016	1.168	---
1.1712	15636	1.1712	---
1.1744	15624	1.1744	---
1.1776	15666	1.1776	---
1.1808	16668	1.1808	---
1.184	16378	1.184	---
1.1872	16261	1.1872	---
1.1904	16162	1.1904	---
1.1936	15870	1.1936	---
1.1968	15877	1.1968	---
1.2	15865	1.2	---
1.2032	15771	1.2032	---
1.2064	16498	1.2064	---
1.2096	16320	1.2096	---
1.2128	16420	1.2128	---
1.216	15906	1.216	---
1.2192	15900	1.2192	---
1.2224	15726	1.2224	---
1.2256	15653	1.2256	---
1.2288	16042	1.2288	---
1.232	16613	1.232	---
1.2352	16792	1.2352	---
1.2384	16458	1.2384	---
1.2416	16509	1.2416	---
1.2448	16146	1.2448	---
1.248	15941	1.248	---
1.2512	15986	1.2512	---
1.2544	15635	1.2544	---
1.2576	15609	1.2576	---
1.2608	15464	1.2608	---
1.264	15384	1.264	---
1.2672	15234	1.2672	15059
1.2704	15486	1.2704	14967.9
1.2736	15157	1.2736	14877.4
1.2768	14993	1.2768	14787.5
1.28	15136	1.28	14698
1.2832	14750	1.2832	14609.2
1.2864	14858	1.2864	14521
1.2896	14552	1.2896	14433.3
1.2928	14600	1.2928	14346
1.296	14468	1.296	14259.3
1.2992	14315	1.2992	14173.3
1.3024	14334	1.3024	14087.9
1.3056	14193	1.3056	14002.9
1.3088	14041	1.3088	13918.4
1.312	13959	1.312	13834.6
1.3152	13898	1.3152	13751.1
1.3184	13665	1.3184	13668.4
1.3216	13757	1.3216	13586
1.3248	13610	1.3248	13504.1
1.328	13562	1.328	13422.8
1.3312	13456	1.3312	13341.8
1.3344	13229	1.3344	13261.5
1.3376	13428	1.3376	13181.6
1.3408	13097	1.3408	13102.1
1.344	13087	1.344	13023.4
1.3472	12866	1.3472	12944.7
1.3504	12731	1.3504	12866.7
1.3536	12918	1.3536	12790.1
1.3568	12948	1.3568	12713.2
1.36	12855	1.36	12636.5
1.3632	12594	1.3632	12560.3
1.3664	12533	1.3664	12485.5
1.3696	12572	1.3696	12410.2
1.3728	12206	1.3728	12335.6
1.376	12175	1.376	12262
1.3792	12146	1.3792	12188.2
1.3824	12362	1.3824	12114.5
1.3856	12054	1.3856	12042.5
1.3888	11888	1.3888	11969.7
1.392	11830	1.392	11898.7
1.3952	11999	1.3952	11826.9
1.3984	11883	1.3984	11756.9
1.4016	11739	1.4016	11685.6
1.4048	11745	1.4048	11616.1
1.408	11639	1.408	11546.2
1.4112	11501	1.4112	11477.6
1.4144	11432	1.4144	11407.8
1.4176	11386	1.4176	11340.2
1.4208	11256	1.4208	11273.1
1.424	11039	1.424	11204.4
1.4272	11228	1.4272	11137.8
1.4304	11006	1.4304	11071.5
1.4336	10895	1.4336	11005.9
1.4368	11008	1.4368	10939
1.44	10756	1.44	10874
1.4432	10725	1.4432	10809.7
1.4464	10668	1.4464	10744.7
1.4496	10712	1.4496	10681
1.4528	10566	1.4528	10616.8
1.456	10692	1.456	10553.8
1.4592	10366	1.4592	10490.8
1.4624	10500	1.4624	10428.2
1.4656	10458	1.4656	10366.3
1.4688	10177	1.4688	10304.3
1.472	10171	1.472	10242.7
1.4752	9928	1.4752	10182.5
1.4784	9966	1.4784	10121.6
1.4816	9982	1.4816	10061.1
1.4848	9943	1.4848	10001.5
1.488	10033	1.488	9941.68
1.4912	9832	1.4912	9882.64
1.4944	9797	1.4944	9824.3
1.4976	9752	1.4976	9766.07
1.5008	9451	1.5008	9707.64
1.504	9423	1.504	9649.96
1.5072	9665	1.5072	9592.77
1.5104	9593	1.5104	9535.78
1.5136	9446	1.5136	9479.38
1.5168	9461	1.5168	9423.21
1.52	9387	1.52	9367.51
1.5232	9324	1.5232	9311.52
1.5264	9391	1.5264	9256.64
1.5296	9246	1.5296	9201.87
1.5328	8968	1.5328	9147.21
1.536	8976	1.536	9093.24
1.5392	8953	1.5392	9039.25
1.5424	8983	1.5424	8985.76
1.5456	8974	1.5456	8932.55
1.5488	8837	1.5488	8879.95
1.552	8774	1.552	8827.21
1.5552	8830	1.5552	8774.98
1.5584	8699	1.5584	8723.3
1.5616	8558	1.5616	8671.7
1.5648	8546	1.5648	8620.58
1.568	8502	1.568	8569.47
1.5712	8482	1.5712	8519.11
1.5744	8243	1.5744	8468.76
1.5776	8309	1.5776	8418.81
1.5808	8259	1.5808	8369.31
1.584	8329	1.584	8319.87
1.5872	8137	1.5872	8270.93
1.5904	8029	1.5904	8222.1
1.5936	7983	1.5936	8173.57
1.5968	8078	1.5968	8125.55
1.6	8042	1.6	8077.67
1.6032	8083	1.6032	8030.27
1.6064	7814	1.6064	7982.96
1.6096	8000	1.6096	7936.14
1.6128	7829	1.6128	7889.35
1.616	7772	1.616	7843.1
1.6192	7675	1.6192	7796.96
1.6224	7728	1.6224	7751.04
1.6256	7560	1.6256	7705.69
1.6288	7589	1.6288	7660.33
1.632	7713	1.632	7615.45
1.6352	7636	1.6352	7570.75
1.6384	7400	1.6384	7526.45
1.6416	7444	1.6416	7482.33
1.6448	7430	1.6448	7438.6
1.648	7416	1.648	7394.76
1.6512	7487	1.6512	7351.43
1.6544	7359	1.6544	7308.38
1.6576	7196	1.6576	7265.68
1.6608	7160	1.6608	7223.17
1.664	7068	1.664	7180.92
1.6672	6872	1.6672	7138.95
1.6704	7087	1.6704	7097.31
1.6736	7110	1.6736	7055.62
1.6768	6958	1.6768	7014.44
1.68	6788	1.68	6973.88
1.6832	6740	1.6832	6933.19
1.6864	6842	1.6864	6892.69
1.6896	6645	1.6896	6852.38
1.6928	6798	1.6928	6812.25
1.696	6774	1.696	6772.51
1.6992	6625	1.6992	6733.47
1.7024	6692	1.7024	6694.1
1.7056	6461	1.7056	6654.91
1.7088	6666	1.7088	6616.09
1.712	6588	1.712	6577.96
1.7152	6479	1.7152	6539.4
1.7184	6544	1.7184	6501.19
1.7216	6438	1.7216	6463.72
1.7248	6332	1.7248	6426.07
1.728	6252	1.728	6389.12
1.7312	6426	1.7312	6351.7
1.7344	6326	1.7344	6314.57
1.7376	6182	1.7376	6278.15
1.7408	6079	1.7408	6241.44
1.744	6122	1.744	6205.46
1.7472	6168	1.7472	6169.79
1.7504	6152	1.7504	6133.79
1.7536	6181	1.7536	6098.36
1.7568	5878	1.7568	6062.64
1.76	5932	1.76	6027.88
1.7632	5981	1.7632	5993.12
1.7664	5871	1.7664	5958.13
1.7696	5977	1.7696	5923.78
1.7728	5931	1.7728	5889.78
1.776	5781	1.776	5855.91
1.7792	5732	1.7792	5821.63
1.7824	5743	1.7824	5788.34
1.7856	5643	1.7856	5754.6
1.7888	5707	1.7888	5721.69
1.792	5656	1.792	5688.38
1.7952	5729	1.7952	5655.78
1.7984	5558	1.7984	5623.12
1.8016	5512	1.8016	5590.92
1.8048	5476	1.8048	5558.43
1.808	5400	1.808	5526.28
1.8112	5537	1.8112	5494.86
1.8144	5416	1.8144	5463.12
1.8176	5530	1.8176	5431.61
1.8208	5338	1.8208	5400.24
1.824	5289	1.824	5369.51
1.8272	5226	1.8272	5338.66
1.8304	5297	1.8304	5307.87
1.8336	5313	1.8336	5277.42
1.8368	5276	1.8368	5247.18
1.84	5229	1.84	5217.08
1.8432	5337	1.8432	5187.18
1.8464	5106	1.8464	5157.43
1.8496	5070	1.8496	5127.84
1.8528	5088	1.8528	5098.31
1.856	4926	1.856	5069.23
1.8592	5213	1.8592	5040.2
1.8624	4961	1.8624	5011.45
1.8656	4855	1.8656	4982.89
1.8688	4834	1.8688	4954.23
1.872	4982	1.872	4925.98
1.8752	4849	1.8752	4897.79
1.8784	4826	1.8784	4869.86
1.8816	4833	1.8816	4841.98
1.8848	4567	1.8848	4814.43
1.888	4802	1.888	4786.99
1.8912	4724	1.8912	4759.7
1.8944	4714	1.8944	4732.51
1.8976	4731	1.8976	4705.58
1.9008	4644	1.9008	4678.86
1.904	4667	1.904	4652.16
1.9072	4495	1.9072	4625.7
1.9104	4453	1.9104	4599.37
1.9136	4445	1.9136	4573.29
1.9168	4560	1.9168	4547.29
1.92	4404	1.92	4521.44
1.9232	4506	1.9232	4495.74
1.9264	4495	1.9264	4470.27
1.9296	4348	1.9296	4444.88
1.9328	4392	1.9328	4419.7
1.936	4385	1.936	4394.59
1.9392	4493	1.9392	4369.72
1.9424	4335	1.9424	4344.96
1.9456	4201	1.9456	4320.37
1.9488	4269	1.9488	4295.92
1.952	4220	1.952	4271.61
1.9552	4169	1.9552	4247.46
1.9584	4262	1.9584	4223.44
1.9616	4175	1.9616	4199.6
1.9648	4131	1.9648	4175.84
1.968	4123	1.968	4152.26
1.9712	4038	1.9712	4128.85
1.9744	4251	1.9744	4105.59
1.9776	4116	1.9776	4082.44
1.9808	3883	1.9808	4059.36
1.984	3915	1.984	4036.5
1.9872	4023	1.9872	4013.78
1.9904	3979	1.9904	3991.2
1.9936	3843	1.9936	3968.76
1.9968	3925	1.9968	3946.43
2	3888	2	3924.28
2.0032	3966	2.0032	3902.22
2.0064	3837	2.0064	3880.3
2.0096	3806	2.0096	3858.52
2.0128	3843	2.0128	3836.82
2.016	3833	2.016	3815.31
2.0192	3794	2.0192	3793.88
2.0224	3694	2.0224	3772.64
2.0256	3720	2.0256	3751.47
2.0288	3673	2.0288	3730.62
2.032	3749	2.032	3709.72
2.0352	3571	2.0352	3688.88
2.0384	3719	2.0384	3668.24
2.0416	3632	2.0416	3647.65
2.0448	3578	2.0448	3627.49
2.048	3653	2.048	3607.17
2.0512	3479	2.0512	3586.96
2.0544	3565	2.0544	3567.05
2.0576	3651	2.0576	3547.1
2.0608	3478	2.0608	3527.28
2.064	3424	2.064	3507.76
2.0672	3542	2.0672	3488.09
2.0704	3486	2.0704	3468.54
2.0736	3372	2.0736	3449.41
2.0768	3425	2.0768	3430.1
2.08	3409	2.08	3411.23
2.0832	3369	2.0832	3392.05
2.0864	3329	2.0864	3373.33
2.0896	3425	2.0896	3354.38
2.0928	3347	2.0928	3336.02
2.096	3220	2.096	3317.55
2.0992	3321	2.0992	3298.96
2.1024	3247	2.1024	3280.85
2.1056	3142	2.1056	3262.74
2.1088	3340	2.1088	3244.53
2.112	3184	2.112	3226.66
2.1152	3192	2.1152	3208.92
2.1184	3185	2.1184	3191.29
2.1216	3124	2.1216	3173.5
2.1248	3194	2.1248	3155.84
2.128	3135	2.128	3138.41
2.1312	3038	2.1312	3121.08
2.1344	3061	2.1344	3103.98
2.1376	3056	2.1376	3086.75
2.1408	3032	2.1408	3069.82
2.144	3137	2.144	3052.88
2.1472	3083	2.1472	3036.14
2.1504	3058	2.1504	3019.39
2.1536	3066	2.1536	3002.71
2.1568	2990	2.1568	2986.15
2.16	2898	2.16	2969.93
2.1632	2850	2.1632	2953.55
2.1664	2977	2.1664	2937.36
2.1696	2908	2.1696	2921.16
2.1728	2903	2.1728	2905.15
2.176	2891	2.176	2889.28
2.1792	2843	2.1792	2873.46
2.1824	2864	2.1824	2857.71
2.1856	2760	2.1856	2842.07
2.1888	2876	2.1888	2826.5
2.192	2816	2.192	2811.09
2.1952	2800	2.1952	2795.7
2.1984	2762	2.1984	2780.47
2.2016	2740	2.2016	2765.19
2.2048	2747	2.2048	2750.14
2.208	2695	2.208	2735.22
2.2112	2742	2.2112	2720.21
2.2144	2672	2.2144	2705.41
2.2176	2739	2.2176	2690.69
2.2208	2749	2.2208	2676.05
2.224	2544	2.224	2661.5
2.2272	2683	2.2272	2647.02
2.2304	2582	2.2304	2632.63
2.2336	2602	2.2336	2618.34
2.2368	2570	2.2368	2604.12
2.24	2605	2.24	2589.97
2.2432	2558	2.2432	2575.91
2.2464	2624	2.2464	2562
2.2496	2593	2.2496	2548.1
2.2528	2493	2.2528	2534.28
2.256	2530	2.256	2520.64
2.2592	2528	2.2592	2506.96
2.2624	2441	2.2624	2493.39
2.2656	2449	2.2656	2479.89
2.2688	2559	2.2688	2466.56
2.272	2467	2.272	2453.2
2.2752	2468	2.2752	2439.96
2.2784	2493	2.2784	2426.84
2.2816	2439	2.2816	2413.73
2.2848	2388	2.2848	2400.71
2.288	2440	2.288	2387.83
2.2912	2381	2.2912	2374.96
2.2944	2350	2.2944	2362.15
2.2976	2401	2.2976	2349.52
2.3008	2371	2.3008	2336.86
2.304	2316	2.304	2324.26
2.3072	2308	2.3072	2311.87
2.3104	2240	2.3104	2299.43
2.3136	2296	2.3136	2287.07
2.3168	2305	2.3168	2274.86
2.32	2301	2.32	2262.65
2.3232	2249	2.3232	2250.59
2.3264	2198	2.3264	2238.51
2.3296	2246	2.3296	2226.51
2.3328	2180	2.3328	2214.67
2.336	2221	2.336	2202.82
2.3392	2192	2.3392	2191.14
2.3424	2212	2.3424	2179.41
2.3456	2091	2.3456	2167.75
2.3488	2139	2.3488	2156.23
2.352	2162	2.352	2144.7
2.3552	2259	2.3552	2133.35
2.3584	2119	2.3584	2121.95
2.3616	2110	2.3616	2110.73
2.3648	2116	2.3648	2099.46
2.368	2104	2.368	2088.26
2.3712	2083	2.3712	2077.19
2.3744	2064	2.3744	2066.22
2.3776	2024	2.3776	2055.29
2.3808	2060	2.3808	2044.32
2.384	2097	2.384	2033.53
2.3872	2047	2.3872	2022.69
2.3904	1931	2.3904	2012.1
2.3936	1979	2.3936	2001.4
2.3968	1995	2.3968	1990.83
2.4	2059	2.4	1980.38
2.4032	2068	2.4032	1969.9
2.4064	1959	2.4064	1959.42
2.4096	2033	2.4096	1949.22
2.4128	1943	2.4128	1938.89
2.416	1895	2.416	1928.65
2.4192	1951	2.4192	1918.45
2.4224	1990	2.4224	1908.47
2.4256	1913	2.4256	1898.33
2.4288	1827	2.4288	1888.46
2.432	1902	2.432	1878.5
2.4352	1899	2.4352	1868.65
2.4384	1871	2.4384	1858.88
2.4416	1838	2.4416	1849.07
2.4448	1763	2.4448	1839.48
2.448	1835	2.448	1829.89
2.4512	1755	2.4512	1820.17
2.4544	1846	2.4544	1810.67
2.4576	1835	2.4576	1801.26
2.4608	1836	2.4608	1791.71
2.464	1756	2.464	1782.5
2.4672	1789	2.4672	1773.17
2.4704	1748	2.4704	1763.86
2.4736	1726	2.4736	1754.73
2.4768	1761	2.4768	1745.61
2.48	1677	2.48	1736.55
2.4832	1751	2.4832	1727.43
2.4864	1728	2.4864	1718.53
2.4896	1753	2.4896	1709.57
2.4928	1740	2.4928	1700.64
2.496	1699	2.496	1691.93
2.4992	1681	2.4992	1683.12
2.5024	1635	2.5024	1674.34
2.5056	1689	2.5056	1665.71
2.5088	1686	2.5088	1657.05
2.512	1752	2.512	1648.54
2.5152	1658	2.5152	1640.02
2.5184	1647	2.5184	1631.57
2.5216	1644	2.5216	1623.12
2.5248	1692	2.5248	1614.77
2.528	1683	2.528	1606.41
2.5312	1596	2.5312	1598.1
2.5344	1627	2.5344	1589.88
2.5376	1646	2.5376	1581.66
2.5408	1589	2.5408	1573.57
2.544	1585	2.544	1565.44
2.5472	1568	2.5472	1557.41
2.5504	1570	2.5504	1549.45
2.5536	1553	2.5536	1541.48
2.5568	1550	2.5568	1533.55
2.56	1521	2.56	1525.73
2.5632	1559	2.5632	1517.91
2.5664	1540	2.5664	1510.12
2.5696	1524	2.5696	1502.39
2.5728	1461	2.5728	1494.71
2.576	1455	2.576	1487.09
2.5792	1457	2.5792	1479.47
2.5824	1483	2.5824	1471.96
2.5856	1414	2.5856	1464.43
2.5888	1498	2.5888	1456.96
2.592	1477	2.592	1449.53
2.5952	1441	2.5952	1442.18
2.5984	1390	2.5984	1434.83
2.6016	1500	2.6016	1427.55
2.6048	1476	2.6048	1420.3
2.608	1424	2.608	1413.09
2.6112	1426	2.6112	1405.91
2.6144	1502	2.6144	1398.8
2.6176	1421	2.6176	1391.69
2.6208	1425	2.6208	1384.64
2.624	1470	2.624	1377.66
2.6272	1393	2.6272	1370.69
2.6304	1422	2.6304	1363.77
2.6336	1317	2.6336	1356.87
2.6368	1415	2.6368	1350.02
2.64	1349	2.64	1343.21
2.6432	1284	2.6432	1336.45
2.6464	1386	2.6464	1329.71
2.6496	1299	2.6496	1323.03
2.6528	1354	2.6528	1316.35
2.656	1354	2.656	1309.74
2.6592	1328	2.6592	1303.18
2.6624	1317	2.6624	1296.63
2.6656	1306	2.6656	1290.13
2.6688	1275	2.6688	1283.67
2.672	1249	2.672	1277.23
2.6752	1259	2.6752	1270.81
2.6784	1267	2.6784	1264.45
2.6816	1285	2.6816	1258.14
2.6848	1225	2.6848	1251.86
2.688	1239	2.688	1245.6
2.6912	1349	2.6912	1239.39
2.6944	1273	2.6944	1233.19
2.6976	1266	2.6976	1227.05
2.7008	1198	2.7008	1220.98
2.704	1164	2.704	1214.9
2.7072	1186	2.7072	1208.86
2.7104	1254	2.7104	1202.84
2.7136	1255	2.7136	1196.86
2.7168	1196	2.7168	1190.91
2.72	1143	2.72	1184.98
2.7232	1195	2.7232	1179.17
2.7264	1170	2.7264	1173.31
2.7296	1194	2.7296	1167.48
2.7328	1137	2.7328	1161.75
2.736	1160	2.736	1155.99
2.7392	1145	2.7392	1150.27
2.7424	1181	2.7424	1144.62
2.7456	1142	2.7456	1138.97
2.7488	1196	2.7488	1133.32
2.752	1155	2.752	1127.78
2.7552	1157	2.7552	1122.2
2.7584	1095	2.7584	1116.72
2.7616	1159	2.7616	1111.18
2.7648	1134	2.7648	1105.77
2.768	1091	2.768	1100.29
2.7712	1141	2.7712	1094.93
2.7744	1096	2.7744	1089.54
2.7776	1095	2.7776	1084.21
2.7808	1076	2.7808	1078.95
2.784	1074	2.784	1073.62
2.7872	1069	2.7872	1068.39
2.7904	1108	2.7904	1063.23
2.7936	1088	2.7936	1057.96
2.7968	1054	2.7968	1052.83
2.8	1027	2.8	1047.73
2.8032	1027	2.8032	1042.59
2.8064	981	2.8064	1037.52
2.8096	1055	2.8096	1032.44
2.8128	992	2.8128	1027.46
2.816	1049	2.816	1022.43
2.8192	1064	2.8192	1017.5
2.8224	1007	2.8224	1012.56
2.8256	1037	2.8256	1007.67
2.8288	1050	2.8288	1002.78
2.832	982	2.832	997.956
2.8352	984	2.8352	993.119
2.8384	1008	2.8384	988.306
2.8416	1038	2.8416	983.518
2.8448	973	2.8448	978.811
2.848	1001	2.848	974.099
2.8512	1007	2.8512	969.386
2.8544	1021	2.8544	964.727
2.8576	1018	2.8576	960.064
2.8608	960	2.8608	955.45
2.864	947	2.864	950.861
2.8672	927	2.8672	946.295
2.8704	1013	2.8704	941.779
2.8736	950	2.8736	937.274
2.8768	936	2.8768	932.78
2.88	994	2.88	928.291
2.8832	857	2.8832	923.864
2.8864	908	2.8864	919.46
2.8896	946	2.8896	915.061
2.8928	910	2.8928	910.686
2.896	989	2.896	906.351
2.8992	929	2.8992	902.04
2.9024	883	2.9024	897.75
2.9056	908	2.9056	893.483
2.9088	894	2.9088	889.225
2.912	912	2.912	884.985
2.9152	901	2.9152	880.798
2.9184	891	2.9184	876.609
2.9216	905	2.9216	872.486
2.9248	881	2.9248	868.336
2.928	862	2.928	864.227
2.9312	915	2.9312	860.132
2.9344	915	2.9344	856.066
2.9376	884	2.9376	852.053
2.9408	837	2.9408	848.023
2.944	861	2.944	844.024
2.9472	844	2.9472	840.038
2.9504	875	2.9504	836.078
2.9536	844	2.9536	832.169
2.9568	819	2.9568	828.251
2.96	867	2.96	824.358
2.9632	836	2.9632	820.482
2.9664	881	2.9664	816.627
2.9696	810	2.9696	812.829
2.9728	803	2.9728	809.015
2.976	792	2.976	805.222
2.9792	847	2.9792	801.448
2.9824	822	2.9824	797.726
2.9856	811	2.9856	793.996
2.9888	810	2.9888	790.287
2.992	815	2.992	786.59
2.9952	807	2.9952	782.952
2.9984	772	2.9984	779.303
3.0016	792	3.0016	775.673
3.0048	788	3.0048	772.062
3.008	818	3.008	768.494
3.0112	787	3.0112	764.923
3.0144	766	3.0144	761.372
3.0176	802	3.0176	757.859
3.0208	760	3.0208	754.348
3.024	703	3.024	750.851
3.0272	813	3.0272	747.409
3.0304	760	3.0304	743.939
3.0336	704	3.0336	740.5
3.0368	779	3.0368	737.068
3.04	780	3.04	733.698
3.0432	760	3.0432	730.317
3.0464	736	3.0464	726.934
3.0496	769	3.0496	723.653
3.0528	792	3.0528	720.3
3.056	733	3.056	716.987
3.0592	689	3.0592	713.719
3.0624	669	3.0624	710.419
3.0656	735	3.0656	707.231
3.0688	749	3.0688	703.969
3.072	712	3.072	700.723
3.0752	684	3.0752	697.553
3.0784	721	3.0784	694.375
3.0816	730	3.0816	691.172
3.0848	680	3.0848	688.042
3.088	721	3.088	684.908
3.0912	671	3.0912	681.803
3.0944	713	3.0944	678.706
3.0976	669	3.0976	675.604
3.1008	668	3.1008	672.591
3.104	711	3.104	669.509
3.1072	698	3.1072	666.503
3.1104	703	3.1104	663.441
3.1136	695	3.1136	660.452
3.1168	679	3.1168	657.473
3.12	688	3.12	654.49
3.1232	711	3.1232	651.545
3.1264	654	3.1264	648.612
3.1296	655	3.1296	645.715
3.1328	624	3.1328	642.752
3.136	640	3.136	639.924
3.1392	641	3.1392	637.026
3.1424	680	3.1424	634.2
3.1456	615	3.1456	631.335
3.1488	600	3.1488	628.453
3.152	675	3.152	625.692
3.1552	647	3.1552	622.855
3.1584	645	3.1584	620.107
3.1616	663	3.1616	617.313
3.1648	678	3.1648	614.568
3.168	648	3.168	611.827
3.1712	625	3.1712	609.115
3.1744	585	3.1744	606.401
3.1776	585	3.1776	603.701
3.1808	641	3.1808	601.005
3.184	595	3.184	598.332
3.1872	631	3.1872	595.702
3.1904	600	3.1904	593.055
3.1936	582	3.1936	590.434
3.1968	597	3.1968	587.813
3.2	622	3.2	585.2
3.2032	606	3.2032	582.618
3.2064	559	3.2064	580.048
3.2096	585	3.2096	577.49
3.2128	589	3.2128	574.946
3.216	565	3.216	572.407
3.2192	596	3.2192	569.887
3.2224	571	3.2224	567.406
3.2256	571	3.2256	564.902
3.2288	560	3.2288	562.413
3.232	581	3.232	559.943
3.2352	570	3.2352	557.502
3.2384	565	3.2384	555.065
3.2416	589	3.2416	552.625
3.2448	512	3.2448	550.219
3.248	519	3.248	547.818
3.2512	531	3.2512	545.422
3.2544	557	3.2544	543.051
3.2576	548	3.2576	540.68
3.2608	563	3.2608	538.34
3.264	561	3.264	535.984
3.2672	537	3.2672	533.654
3.2704	552	3.2704	531.349
3.2736	565	3.2736	529.025
3.2768	492	3.2768	526.743
3.28	572	3.28	524.464
3.2832	525	3.2832	522.195
3.2864	539	3.2864	519.934
3.2896	492	3.2896	517.685
3.2928	554	3.2928	515.461
3.296	502	3.296	513.237
3.2992	489	3.2992	511.021
3.3024	539	3.3024	508.831
3.3056	481	3.3056	506.629
3.3088	510	3.3088	504.461
3.312	496	3.312	502.303
3.3152	501	3.3152	500.134
3.3184	476	3.3184	497.998
3.3216	493	3.3216	495.863
3.3248	499	3.3248	493.749
3.328	501	3.328	491.622
3.3312	512	3.3312	489.531
3.3344	528	3.3344	487.439
3.3376	481	3.3376	485.368
3.3408	470	3.3408	483.298
3.344	464	3.344	481.243
3.3472	506	3.3472	479.184
3.3504	454	3.3504	477.164
3.3536	499	3.3536	475.126
3.3568	478	3.3568	473.117
3.36	441	3.36	471.107
3.3632	436	3.3632	469.12
3.3664	435	3.3664	467.131
3.3696	425	3.3696	465.152
3.3728	443	3.3728	463.193
3.376	451	3.376	461.235
3.3792	435	3.3792	459.301
3.3824	478	3.3824	457.363
3.3856	448	3.3856	455.44
3.3888	492	3.3888	453.518
3.392	427	3.392	451.607
3.3952	439	3.3952	449.713
3.3984	472	3.3984	447.835
3.4016	496	3.4016	445.961
3.4048	476	3.4048	444.092
3.408	515	3.408	442.225
3.4112	442	3.4112	440.388
3.4144	490	3.4144	438.554
3.4176	428	3.4176	436.717
3.4208	413	3.4208	434.9
3.424	433	3.424	433.094
3.4272	406	3.4272	431.28
3.4304	422	3.4304	429.498
3.4336	434	3.4336	427.713
3.4368	410	3.4368	425.927
3.44	438	3.44	424.174
3.4432	427	3.4432	422.399
3.4464	436	3.4464	420.671
3.4496	494	3.4496	418.914
3.4528	460	3.4528	417.188
3.456	402	3.456	415.483
3.4592	442	3.4592	413.755
3.4624	439	3.4624	412.058
3.4656	427	3.4656	410.35
3.4688	413	3.4688	408.671
3.472	426	3.472	406.998
3.4752	385	3.4752	405.305
3.4784	388	3.4784	403.653
3.4816	395	3.4816	402.006
3.4848	415	3.4848	400.361
3.488	373	3.488	398.716
3.4912	408	3.4912	397.087
3.4944	390	3.4944	395.471
3.4976	408	3.4976	393.852
3.5008	409	3.5008	392.254
3.504	382	3.504	390.655
3.5072	364	3.5072	389.064
3.5104	420	3.5104	387.486
3.5136	400	3.5136	385.909
3.5168	371	3.5168	384.348
3.52	387	3.52	382.786
3.5232	385	3.5232	381.232
3.5264	406	3.5264	379.692
3.5296	388	3.5296	378.153
3.5328	353	3.5328	376.634
3.536	364	3.536	375.115
3.5392	409	3.5392	373.598
3.5424	359	3.5424	372.093
3.5456	372	3.5456	370.596
3.5488	375	3.5488	369.106
3.552	325	3.552	367.623
3.5552	355	3.5552	366.147
3.5584	343	3.5584	364.678
3.5616	353	3.5616	363.216
3.5648	350	3.5648	361.761
3.568	330	3.568	360.317
3.5712	370	3.5712	358.876
3.5744	330	3.5744	357.441
3.5776	359	3.5776	356.018
3.5808	363	3.5808	354.598
3.584	338	3.584	353.187
3.5872	350	3.5872	351.78
3.5904	321	3.5904	350.383
3.5936	325	3.5936	348.993
3.5968	371	3.5968	347.608
3.6	364	3.6	346.236
3.6032	319	3.6032	344.863
3.6064	332	3.6064	343.501
3.6096	347	3.6096	342.14
3.6128	373	3.6128	340.79
3.616	326	3.616	339.445
3.6192	341	3.6192	338.108
3.6224	322	3.6224	336.775
3.6256	300	3.6256	335.448
3.6288	318	3.6288	334.132
3.632	363	3.632	332.819
3.6352	345	3.6352	331.511
3.6384	337	3.6384	330.218
3.6416	323	3.6416	328.923
3.6448	336	3.6448	327.636
3.648	315	3.648	326.354
3.6512	322	3.6512	325.079
3.6544	337	3.6544	323.81
3.6576	330	3.6576	322.546
3.6608	330	3.6608	321.298
3.664	317	3.664	320.047
3.6672	308	3.6672	318.802
3.6704	302	3.6704	317.56
3.6736	298	3.6736	316.328
3.6768	312	3.6768	315.101
3.68	303	3.68	313.875
3.6832	334	3.6832	312.671
3.6864	309	3.6864	311.462
3.6896	304	3.6896	310.255
3.6928	318	3.6928	309.058
3.696	319	3.696	307.863
3.6992	289	3.6992	306.689
3.7024	298	3.7024	305.505
3.7056	304	3.7056	304.326
3.7088	320	3.7088	303.153
3.712	332	3.712	301.989
3.7152	273	3.7152	300.84
3.7184	306	3.7184	299.693
3.7216	310	3.7216	298.542
3.7248	269	3.7248	297.395
3.728	294	3.728	296.256
3.7312	278	3.7312	295.139
3.7344	289	3.7344	294.009
3.7376	271	3.7376	292.882
3.7408	326	3.7408	291.762
3.744	300	3.744	290.67
3.7472	281	3.7472	289.559
3.7504	301	3.7504	288.454
3.7536	270	3.7536	287.354
3.7568	278	3.7568	286.285
3.76	312	3.76	285.193
3.7632	260	3.7632	284.109
3.7664	291	3.7664	283.055
3.7696	248	3.7696	281.979
3.7728	281	3.7728	280.908
3.776	272	3.776	279.845
3.7792	274	3.7792	278.802
3.7824	271	3.7824	277.756
3.7856	272	3.7856	276.696
3.7888	253	3.7888	275.679
3.792	277	3.792	274.635
3.7952	260	3.7952	273.6
3.7984	262	3.7984	272.6
3.8016	283	3.8016	271.568
3.8048	296	3.8048	270.549
3.808	309	3.808	269.55
3.8112	267	3.8112	268.537
3.8144	280	3.8144	267.541
3.8176	263	3.8176	266.546
3.8208	251	3.8208	265.548
3.824	255	3.824	264.563
3.8272	276	3.8272	263.589
3.8304	264	3.8304	262.602
3.8336	273	3.8336	261.631
3.8368	243	3.8368	260.67
3.84	249	3.84	259.701
3.8432	297	3.8432	258.75
3.8464	254	3.8464	257.788
3.8496	251	3.8496	256.827
3.8528	247	3.8528	255.893
3.856	257	3.856	254.952
3.8592	253	3.8592	254.027
3.8624	267	3.8624	253.086
3.8656	245	3.8656	252.142
3.8688	239	3.8688	251.23
3.872	252	3.872	250.301
3.8752	266	3.8752	249.402
3.8784	250	3.8784	248.478
3.8816	237	3.8816	247.587
3.8848	209	3.8848	246.675
3.888	262	3.888	245.758
3.8912	240	3.8912	244.88
3.8944	243	3.8944	243.979
3.8976	216	3.8976	243.101
3.9008	209	3.9008	242.211
3.904	267	3.904	241.347
3.9072	243	3.9072	240.454
3.9104	232	3.9104	239.603
3.9136	229	3.9136	238.72
3.9168	218	3.9168	237.875
3.92	243	3.92	236.998
3.9232	223	3.9232	236.149
3.9264	227	3.9264	235.299
3.9296	253	3.9296	234.457
3.9328	245	3.9328	233.615
3.936	232	3.936	232.776
3.9392	213	3.9392	231.942
3.9424	266	3.9424	231.113
3.9456	236	3.9456	230.279
3.9488	200	3.9488	229.455
3.952	241	3.952	228.635
3.9552	234	3.9552	227.82
3.9584	210	3.9584	227.007
3.9616	178	3.9616	226.2
3.9648	207	3.9648	225.386
3.968	212	3.968	224.585
3.9712	230	3.9712	223.786
3.9744	211	3.9744	223.001
3.9776	214	3.9776	222.193
3.9808	211	3.9808	221.414
3.984	208	3.984	220.63
3.9872	201	3.9872	219.849
3.9904	185	3.9904	219.064
3.9936	229	3.9936	218.298
3.9968	217	3.9968	217.528
4	221	4	216.761
4.0032	215	4.0032	215.997
4.0064	212	4.0064	215.237
4.0096	199	4.0096	214.48
4.0128	200	4.0128	213.734
4.016	189	4.016	212.976
4.0192	218	4.0192	212.236
4.0224	200	4.0224	211.492
4.0256	213	4.0256	210.745
4.0288	212	4.0288	210.015
4.032	198	4.032	209.287
4.0352	208	4.0352	208.548
4.0384	229	4.0384	207.82
4.0416	180	4.0416	207.096
4.0448	216	4.0448	206.374
4.048	187	4.048	205.663
4.0512	220	4.0512	204.947
4.0544	187	4.0544	204.235
4.0576	197	4.0576	203.532
4.0608	187	4.0608	202.826
4.064	177	4.064	202.123
4.0672	203	4.0672	201.423
4.0704	198	4.0704	200.735
4.0736	215	4.0736	200.035
4.0768	206	4.0768	199.349
4.08	199	4.08	198.661
4.0832	201	4.0832	197.981
4.0864	199	4.0864	197.304
4.0896	201	4.0896	196.622
4.0928	202	4.0928	195.95
4.096	203	4.096	195.276
4.0992	191	4.0992	194.61
4.1024	176	4.1024	193.946
4.1056	187	4.1056	193.284
4.1088	171	4.1088	192.626
4.112	203	4.112	191.97
4.1152	211	4.1152	191.308
4.1184	183	4.1184	190.659
4.1216	167	4.1216	190.01
4.1248	176	4.1248	189.366
4.128	173	4.128	188.724
4.1312	186	4.1312	188.084
4.1344	163	4.1344	187.451
4.1376	187	4.1376	186.818
4.1408	178	4.1408	186.182
4.144	189	4.144	185.556
4.1472	181	4.1472	184.931
4.1504	175	4.1504	184.306
4.1536	168	4.1536	183.685
4.1568	171	4.1568	183.067
4.16	153	4.16	182.452
4.1632	166	4.1632	181.839
4.1664	193	4.1664	181.229
4.1696	159	4.1696	180.627
4.1728	170	4.1728	180.022
4.176	194	4.176	179.416
4.1792	214	4.1792	178.82
4.1824	178	4.1824	178.222
4.1856	167	4.1856	177.627
4.1888	155	4.1888	177.036
4.192	148	4.192	176.45
4.1952	201	4.1952	175.861
4.1984	167	4.1984	175.277
4.2016	158	4.2016	174.697
4.2048	177	4.2048	174.117
4.208	177	4.208	173.54
4.2112	168	4.2112	172.963
4.2144	168	4.2144	172.393
4.2176	168	4.2176	171.825
4.2208	187	4.2208	171.257
4.224	175	4.224	170.695
4.2272	158	4.2272	170.131
4.2304	170	4.2304	169.573
4.2336	163	4.2336	169.014
4.2368	165	4.2368	168.46
4.24	162	4.24	167.907
4.2432	146	4.2432	167.357
4.2464	150	4.2464	166.809
4.2496	155	4.2496	166.266
4.2528	138	4.2528	165.722
4.256	160	4.256	165.181
4.2592	167	4.2592	164.643
4.2624	164	4.2624	164.106
4.2656	173	4.2656	163.573
4.2688	180	4.2688	163.04
4.272	156	4.272	162.511
4.2752	162	4.2752	161.983
4.2784	163	4.2784	161.459
4.2816	152	4.2816	160.936
4.2848	159	4.2848	160.415
4.288	160	4.288	159.897
4.2912	145	4.2912	159.381
4.2944	151	4.2944	158.866
4.2976	151	4.2976	158.354
4.3008	157	4.3008	157.844
4.304	166	4.304	157.337
4.3072	173	4.3072	156.832
4.3104	150	4.3104	156.328
4.3136	149	4.3136	155.827
4.3168	140	4.3168	155.328
4.32	135	4.32	154.831
4.3232	134	4.3232	154.335
4.3264	123	4.3264	153.843
4.3296	152	4.3296	153.352
4.3328	138	4.3328	152.863
4.336	144	4.336	152.376
4.3392	148	4.3392	151.891
4.3424	170	4.3424	151.408
4.3456	150	4.3456	150.927
4.3488	150	4.3488	150.448
4.352	153	4.352	149.971
4.3552	155	4.3552	149.496
4.3584	140	4.3584	149.024
4.3616	151	4.3616	148.552
4.3648	144	4.3648	148.083
4.368	134	4.368	147.618
4.3712	138	4.3712	147.154
4.3744	134	4.3744	146.69
4.3776	146	4.3776	146.228
4.3808	130	4.3808	145.768
4.384	130	4.384	145.311
4.3872	133	4.3872	144.855
4.3904	147	4.3904	144.401
4.3936	126	4.3936	143.949
4.3968	142	4.3968	143.499
4.4	132	4.4	143.053
4.4032	140	4.4032	142.607
4.4064	141	4.4064	142.161
4.4096	131	4.4096	141.718
4.4128	134	4.4128	141.277
4.416	150	4.416	140.837
4.4192	131	4.4192	140.401
4.4224	150	4.4224	139.963
4.4256	134	4.4256	139.534
4.4288	121	4.4288	139.101
4.432	117	4.432	138.669
4.4352	131	4.4352	138.242
4.4384	117	4.4384	137.813
4.4416	153	4.4416	137.387
4.4448	142	4.4448	136.97
4.448	119	4.448	136.546
4.4512	129	4.4512	136.124
4.4544	113	4.4544	135.706
4.4576	128	4.4576	135.289
4.4608	126	4.4608	134.881
4.464	117	4.464	134.465
4.4672	135	4.4672	134.052
4.4704	134	4.4704	133.642
4.4736	148	4.4736	133.232
4.4768	137	4.4768	132.831
4.48	143	4.48	132.426
4.4832	129	4.4832	132.018
4.4864	122	4.4864	131.616
4.4896	140	4.4896	131.225
4.4928	118	4.4928	130.822
4.496	131	4.496	130.425
4.4992	117	4.4992	130.028
4.5024	158	4.5024	129.63
4.5056	114	4.5056	129.245
4.5088	109	4.5088	128.853
4.512	130	4.512	128.462
4.5152	132	4.5152	128.081
4.5184	115	4.5184	127.693
4.5216	110	4.5216	127.307
4.5248	111	4.5248	126.923
4.528	124	4.528	126.547
4.5312	117	4.5312	126.166
4.5344	114	4.5344	125.783
4.5376	109	4.5376	125.413
4.5408	98	4.5408	125.037
4.544	107	4.544	124.658
4.5472	116	4.5472	124.284
4.5504	129	4.5504	123.921
4.5536	122	4.5536	123.548
4.5568	125	4.5568	123.178
4.56	101	4.56	122.82
4.5632	129	4.5632	122.45
4.5664	87	4.5664	122.085
4.5696	117	4.5696	121.729
4.5728	139	4.5728	121.367
4.576	117	4.576	121.003
4.5792	100	4.5792	120.65
4.5824	104	4.5824	120.292
4.5856	113	4.5856	119.943
4.5888	137	4.5888	119.585
4.592	114	4.592	119.232
4.5952	123	4.5952	118.887
4.5984	141	4.5984	118.533
4.6016	85	4.6016	118.18
4.6048	116	4.6048	117.84
4.608	119	4.608	117.49
4.6112	118	4.6112	117.153
4.6144	130	4.6144	116.81
4.6176	111	4.6176	116.464
4.6208	116	4.6208	116.131
4.624	110	4.624	115.784
4.6272	105	4.6272	115.454
4.6304	101	4.6304	115.114
4.6336	119	4.6336	114.787
4.6368	103	4.6368	114.449
4.64	121	4.64	114.112
4.6432	120	4.6432	113.79
4.6464	116	4.6464	113.452
4.6496	101	4.6496	113.132
4.6528	110	4.6528	112.801
4.656	105	4.656	112.48
4.6592	132	4.6592	112.151
4.6624	106	4.6624	111.837
4.6656	103	4.6656	111.506
4.6688	106	4.6688	111.195
4.672	114	4.672	110.867
4.6752	107	4.6752	110.558
4.6784	108	4.6784	110.233
4.6816	99	4.6816	109.92
4.6848	117	4.6848	109.607
4.688	99	4.688	109.29
4.6912	101	4.6912	108.98
4.6944	92	4.6944	108.67
4.6976	101	4.6976	108.361
4.7008	110	4.7008	108.054
4.704	104	4.704	107.748
4.7072	110	4.7072	107.442
4.7104	103	4.7104	107.134
4.7136	113	4.7136	106.831
4.7168	95	4.7168	106.53
4.72	84	4.72	106.229
4.7232	105	4.7232	105.929
4.7264	109	4.7264	105.627
4.7296	105	4.7296	105.329
4.7328	97	4.7328	105.037
4.736	124	4.736	104.742
4.7392	103	4.7392	104.448
4.7424	106	4.7424	104.151
4.7456	111	4.7456	103.859
4.7488	101	4.7488	103.572
4.752	112	4.752	103.282
4.7552	102	4.7552	102.989
4.7584	89	4.7584	102.701
4.7616	78	4.7616	102.418
4.7648	105	4.7648	102.13
4.768	83	4.768	101.845
4.7712	102	4.7712	101.565
4.7744	74	4.7744	101.282
4.7776	92	4.7776	101.001
4.7808	85	4.7808	100.721
4.784	112	4.784	100.444
4.7872	112	4.7872	100.162
4.7904	99	4.7904	99.889
4.7936	76	4.7936	99.6088
4.7968	105	4.7968	99.3341
4.8	98	4.8	99.0625
4.8032	79	4.8032	98.7867
4.8064	111	4.8064	98.5172
4.8096	95	4.8096	98.2486
4.8128	86	4.8128	97.9756
4.816	77	4.816	97.7098
4.8192	87	4.8192	97.4411
4.8224	94	4.8224	97.1743
4.8256	91	4.8256	96.9097
4.8288	85	4.8288	96.6449
4.832	87	4.832	96.3841
4.8352	101	4.8352	96.1166
4.8384	103	4.8384	95.8573
4.8416	102	4.8416	95.5966
4.8448	89	4.8448	95.3376
4.848	66	4.848	95.0758
4.8512	92	4.8512	94.8199
4.8544	75	4.8544	94.5617
4.8576	100	4.8576	94.308
4.8608	103	4.8608	94.0517
4.864	79	4.864	93.7998
4.8672	101	4.8672	93.5457
4.8704	86	4.8704	93.2955
4.8736	84	4.8736	93.0405
4.8768	81	4.8768	92.7947
4.88	98	4.88	92.5421
4.8832	93	4.8832	92.297
4.8864	94	4.8864	92.0463
4.8896	71	4.8896	91.8033
4.8928	71	4.8928	91.5569
4.896	89	4.896	91.311
4.8992	93	4.8992	91.0684
4.9024	83	4.9024	90.8247
4.9056	113	4.9056	90.5834
4.9088	94	4.9088	90.3414
4.912	88	4.912	90.1004
4.9152	87	4.9152	89.8638
4.9184	78	4.9184	89.6247
4.9216	101	4.9216	89.3862
4.9248	71	4.9248	89.1503
4.928	86	4.928	88.9155
4.9312	73	4.9312	88.6793
4.9344	93	4.9344	88.4462
4.9376	81	4.9376	88.2123
4.9408	82	4.9408	87.9802
4.944	83	4.944	87.7495
4.9472	76	4.9472	87.5181
4.9504	79	4.9504	87.2887
4.9536	87	4.9536	87.0591
4.9568	88	4.9568	86.8326
4.96	75	4.96	86.6046
4.9632	91	4.9632	86.3787
4.9664	83	4.9664	86.1524
4.9696	78	4.9696	85.9292
4.9728	72	4.9728	85.7045
4.976	88	4.976	85.4817
4.9792	94	4.9792	85.2587
4.9824	78	4.9824	85.0384
4.9856	83	4.9856	84.8172
4.9888	76	4.9888	84.5976
4.992	93	4.992	84.3779
4.9952	76	4.9952	84.1599
4.9984	75	4.9984	83.9426
5.0016	87	5.0016	83.7261
5.0048	87	5.0048	83.5104
5.008	85	5.008	83.2954
5.0112	71	5.0112	83.0813
5.0144	89	5.0144	82.8673
5.0176	85	5.0176	82.6547
5.0208	86	5.0208	82.4428
5.024	82	5.024	82.2322
5.0272	70	5.0272	82.0214
5.0304	79	5.0304	81.8118
5.0336	81	5.0336	81.6029
5.0368	94	5.0368	81.3949
5.04	84	5.04	81.1875
5.0432	71	5.0432	80.9809
5.0464	75	5.0464	80.775
5.0496	72	5.0496	80.57
5.0528	78	5.0528	80.3656
5.056	85	5.056	80.1619
5.0592	84	5.0592	79.9588
5.0624	72	5.0624	79.7567
5.0656	80	5.0656	79.5553
5.0688	87	5.0688	79.3546
5.072	83	5.072	79.1546
5.0752	73	5.0752	78.9553
5.0784	73	5.0784	78.7567
5.0816	79	5.0816	78.5589
5.0848	69	5.0848	78.3618
5.088	83	5.088	78.1653
5.0912	82	5.0912	77.9698
5.0944	72	5.0944	77.7748
5.0976	67	5.0976	77.5805
5.1008	88	5.1008	77.3866
5.104	74	5.104	77.1937
5.1072	73	5.1072	77.0011
5.1104	77	5.1104	76.81
5.1136	81	5.1136	76.6188
5.1168	79	5.1168	76.4287
5.12	70	5.12	76.2386
5.1232	78	5.1232	76.05
5.1264	82	5.1264	75.8617
5.1296	75	5.1296	75.6738
5.1328	80	5.1328	75.4888
5.136	77	5.136	75.3021
5.1392	68	5.1392	75.1169
5.1424	65	5.1424	74.9316
5.1456	66	5.1456	74.7472
5.1488	83	5.1488	74.5638
5.152	73	5.152	74.3804
5.1552	75	5.1552	74.1981
5.1584	87	5.1584	74.0159
5.1616	69	5.1616	73.8351
5.1648	71	5.1648	73.6566
5.168	56	5.168	73.4763
5.1712	65	5.1712	73.2974
5.1744	65	5.1744	73.1191
5.1776	58	5.1776	72.9405
5.1808	77	5.1808	72.7626
5.184	66	5.184	72.586
5.1872	69	5.1872	72.4117
5.1904	73	5.1904	72.2365
5.1936	67	5.1936	72.0617
5.1968	70	5.1968	71.8869
5.2	78	5.2	71.713
5.2032	71	5.2032	71.5394
5.2064	63	5.2064	71.3694
5.2096	66	5.2096	71.1979
5.2128	87	5.2128	71.0258
5.216	59	5.216	70.8555
5.2192	70	5.2192	70.6846
5.2224	65	5.2224	70.5182
5.2256	69	5.2256	70.3487
5.2288	69	5.2288	70.1807
5.232	61	5.232	70.0121
5.2352	66	5.2352	69.844
5.2384	68	5.2384	69.6812
5.2416	91	5.2416	69.5147
5.2448	79	5.2448	69.3486
5.248	72	5.248	69.1828
5.2512	68	5.2512	69.0226
5.2544	68	5.2544	68.8582
5.2576	63	5.2576	68.6943
5.2608	77	5.2608	68.5308
5.264	65	5.264	68.3721
5.2672	61	5.2672	68.2099
5.2704	68	5.2704	68.0485
5.2736	67	5.2736	67.8874
5.2768	67	5.2768	67.7309
5.28	68	5.28	67.5711
5.2832	65	5.2832	67.4117
5.2864	59	5.2864	67.2529
5.2896	79	5.2896	67.099
5.2928	49	5.2928	66.9399
5.296	68	5.296	66.7829
5.2992	72	5.2992	66.6307
5.3024	65	5.3024	66.4732
5.3056	53	5.3056	66.3178
5.3088	73	5.3088	66.1675
5.312	58	5.312	66.0117
5.3152	59	5.3152	65.8578
5.3184	72	5.3184	65.7094
5.3216	71	5.3216	65.555
5.3248	60	5.3248	65.4029
5.328	72	5.328	65.2546
5.3312	53	5.3312	65.1035
5.3344	57	5.3344	64.9513
5.3376	57	5.3376	64.8047
5.3408	84	5.3408	64.6552
5.344	48	5.344	64.5045
5.3472	51	5.3472	64.3597
5.3504	61	5.3504	64.2118
5.3536	54	5.3536	64.0626
5.3568	59	5.3568	63.9194
5.36	66	5.36	63.7713
5.3632	68	5.3632	63.6292
5.3664	63	5.3664	63.4821
5.3696	54	5.3696	63.3354
5.3728	72	5.3728	63.197
5.376	47	5.376	63.0513
5.3792	57	5.3792	62.9122
5.3824	56	5.3824	62.7655
5.3856	75	5.3856	62.6213
5.3888	54	5.3888	62.4838
5.392	57	5.392	62.3405
5.3952	58	5.3952	62.2041
5.3984	68	5.3984	62.0619
5.4016	57	5.4016	61.9266
5.4048	69	5.4048	61.7832
5.408	61	5.408	61.649
5.4112	58	5.4112	61.5087
5.4144	71	5.4144	61.369
5.4176	60	5.4176	61.2341
5.4208	56	5.4208	61.0953
5.424	59	5.424	60.9615
5.4272	53	5.4272	60.8236
5.4304	60	5.4304	60.6909
5.4336	51	5.4336	60.5539
5.4368	64	5.4368	60.4222
5.44	68	5.44	60.2878
5.4432	69	5.4432	60.155
5.4464	57	5.4464	60.0227
5.4496	51	5.4496	59.8907
5.4528	64	5.4528	59.7569
5.456	50	5.456	59.626
5.4592	49	5.4592	59.4953
5.4624	51	5.4624	59.365
5.4656	58	5.4656	59.2351
5.4688	59	5.4688	59.1059
5.472	71	5.472	58.9746
5.4752	63	5.4752	58.8463
5.4784	50	5.4784	58.718
5.4816	56	5.4816	58.5901
5.4848	71	5.4848	58.4629
5.488	69	5.488	58.3338
5.4912	52	5.4912	58.2094
5.4944	60	5.4944	58.0831
5.4976	59	5.4976	57.9575
5.5008	56	5.5008	57.832
5.504	39	5.504	57.7053
5.5072	54	5.5072	57.5828
5.5104	50	5.5104	57.4584
5.5136	41	5.5136	57.3348
5.5168	55	5.5168	57.2093
5.52	58	5.52	57.0884
5.5232	60	5.5232	56.9659
5.5264	37	5.5264	56.8421
5.5296	56	5.5296	56.7218
5.5328	66	5.5328	56.6005
5.536	64	5.536	56.4796
5.5392	54	5.5392	56.3588
5.5424	67	5.5424	56.2405
5.5456	52	5.5456	56.1189
5.5488	53	5.5488	56.0012
5.552	49	5.552	55.8819
5.5552	58	5.5552	55.7618
5.5584	53	5.5584	55.645
5.5616	41	5.5616	55.5288
5.5648	53	5.5648	55.4096
5.568	56	5.568	55.294
5.5712	57	5.5712	55.1787
5.5744	51	5.5744	55.0609
5.5776	57	5.5776	54.9463
5.5808	52	5.5808	54.8291
5.584	56	5.584	54.7153
5.5872	47	5.5872	54.6004
5.5904	69	5.5904	54.4873
5.5936	46	5.5936	54.3731
5.5968	56	5.5968	54.2593
5.6	51	5.6	54.1472
5.6032	64	5.6032	54.0342
5.6064	62	5.6064	53.9215
5.6096	50	5.6096	53.8091
5.6128	65	5.6128	53.6985
5.616	57	5.616	53.5868
5.6192	46	5.6192	53.4769
5.6224	44	5.6224	53.3659
5.6256	41	5.6256	53.2567
5.6288	57	5.6288	53.1464
5.632	49	5.632	53.0379
5.6352	69	5.6352	52.9284
5.6384	42	5.6384	52.8204
5.6416	58	5.6416	52.7117
5.6448	59	5.6448	52.6022
5.648	55	5.648	52.4964
5.6512	63	5.6512	52.3887
5.6544	50	5.6544	52.2824
5.6576	41	5.6576	52.1755
5.6608	43	5.6608	52.0689
5.664	55	5.664	51.9636
5.6672	40	5.6672	51.8577
5.6704	70	5.6704	51.7531
5.6736	51	5.6736	51.6488
5.6768	46	5.6768	51.5439
5.68	44	5.68	51.4403
5.6832	62	5.6832	51.3361
5.6864	50	5.6864	51.2331
5.6896	58	5.6896	51.1305
5.6928	53	5.6928	51.0273
5.696	59	5.696	50.9246
5.6992	56	5.6992	50.8236
5.7024	43	5.7024	50.7215
5.7056	50	5.7056	50.6198
5.7088	52	5.7088	50.519
5.712	54	5.712	50.4186
5.7152	48	5.7152	50.3185
5.7184	54	5.7184	50.2181
5.7216	43	5.7216	50.1193
5.7248	45	5.7248	50.0195
5.728	54	5.728	49.9207
5.7312	60	5.7312	49.8216
5.7344	38	5.7344	49.7234
5.7376	47	5.7376	49.6255
5.7408	48	5.7408	49.5279
5.744	53	5.744	49.4301
5.7472	52	5.7472	49.3332
5.7504	43	5.7504	49.2361
5.7536	46	5.7536	49.1402
5.7568	46	5.7568	49.0442
5.76	44	5.76	48.9481
5.7632	31	5.7632	48.8526
5.7664	60	5.7664	48.7575
5.7696	49	5.7696	48.6627
5.7728	46	5.7728	48.5682
5.776	53	5.776	48.474
5.7792	41	5.7792	48.38
5.7824	40	5.7824	48.2864
5.7856	43	5.7856	48.1929
5.7888	39	5.7888	48.0999
5.792	49	5.792	48.0072
5.7952	42	5.7952	47.9148
5.7984	52	5.7984	47.8227
5.8016	39	5.8016	47.731
5.8048	48	5.8048	47.6394
5.808	50	5.808	47.5482
5.8112	67	5.8112	47.4573
5.8144	47	5.8144	47.3667
5.8176	46	5.8176	47.2763
5.8208	39	5.8208	47.1863
5.824	44	5.824	47.0965
5.8272	38	5.8272	47.0071
5.8304	49	5.8304	46.9179
5.8336	44	5.8336	46.8293
5.8368	60	5.8368	46.7405
5.84	48	5.84	46.6523
5.8432	55	5.8432	46.5643
5.8464	55	5.8464	46.4767
5.8496	43	5.8496	46.389
5.8528	50	5.8528	46.302
5.856	43	5.856	46.2152
5.8592	36	5.8592	46.1284
5.8624	40	5.8624	46.0422
5.8656	50	5.8656	45.9561
5.8688	50	5.8688	45.8704
5.872	38	5.872	45.7847
5.8752	38	5.8752	45.6996
5.8784	46	5.8784	45.6147
5.8816	47	5.8816	45.5298
5.8848	48	5.8848	45.4456
5.888	44	5.888	45.3613
5.8912	45	5.8912	45.2773
5.8944	46	5.8944	45.1936
5.8976	31	5.8976	45.1111
5.9008	40	5.9008	45.028
5.904	37	5.904	44.9454
5.9072	26	5.9072	44.8627
5.9104	34	5.9104	44.7805
5.9136	40	5.9136	44.6984
5.9168	35	5.9168	44.6165
5.92	48	5.92	44.5349
5.9232	43	5.9232	44.4536
5.9264	44	5.9264	44.3736
5.9296	46	5.9296	44.2928
5.9328	48	5.9328	44.2123
5.936	45	5.936	44.1321
5.9392	46	5.9392	44.0517
5.9424	38	5.9424	43.972
5.9456	45	5.9456	43.8925
5.9488	29	5.9488	43.8145
5.952	42	5.952	43.7356
5.9552	30	5.9552	43.6565
5.9584	40	5.9584	43.578
5.9616	45	5.9616	43.4994
5.9648	44	5.9648	43.4215
5.968	50	5.968	43.3452
5.9712	38	5.9712	43.2673
5.9744	39	5.9744	43.1902
5.9776	55	5.9776	43.1128
5.9808	40	5.9808	43.0361
5.984	43	5.984	42.9608
5.9872	37	5.9872	42.8846
5.9904	45	5.9904	42.8082
5.9936	34	5.9936	42.732
5.9968	38	5.9968	42.6561
6	39	6	42.5826
6.0032	39	6.0032	42.5072
6.0064	46	6.0064	42.432
6.0096	35	6.0096	42.357
6.0128	41	6.0128	42.2847
6.016	40	6.016	42.2102
6.0192	41	6.0192	42.1359
6.0224	45	6.0224	42.0619
6.0256	31	6.0256	41.99
6.0288	47	6.0288	41.9165
6.032	45	6.032	41.8432
6.0352	49	6.0352	41.7701
6.0384	40	6.0384	41.6993
6.0416	35	6.0416	41.6267
6.0448	41	6.0448	41.5543
6.048	48	6.048	41.4843
6.0512	33	6.0512	41.4117
6.0544	40	6.0544	41.34
6.0576	40	6.0576	41.2686
6.0608	40	6.0608	41.1989
6.064	41	6.064	41.1279
6.0672	36	6.0672	41.0571
6.0704	40	6.0704	40.9881
6.0736	30	6.0736	40.9179
6.0768	46	6.0768	40.847
6.08	36	6.08	40.7796
6.0832	46	6.0832	40.71
6.0864	47	6.0864	40.6398
6.0896	37	6.0896	40.5731
6.0928	38	6.0928	40.5034
6.096	30	6.096	40.4338
6.0992	37	6.0992	40.368
6.1024	41	6.1024	40.2988
6.1056	34	6.1056	40.2326
6.1088	40	6.1088	40.1648
6.112	38	6.112	40.0964
6.1152	38	6.1152	40.0309
6.1184	46	6.1184	39.9628
6.1216	49	6.1216	39.895
6.1248	33	6.1248	39.8302
6.128	35	6.128	39.7628
6.1312	41	6.1312	39.6994
6.1344	35	6.1344	39.6325
6.1376	41	6.1376	39.5657
6.1408	39	6.1408	39.5011
6.144	47	6.144	39.4348
6.1472	35	6.1472	39.3717
6.1504	35	6.1504	39.3058
6.1536	44	6.1536	39.2431
6.1568	35	6.1568	39.1776
6.16	41	6.16	39.1123
6.1632	40	6.1632	39.0494
6.1664	48	6.1664	38.9845
6.1696	43	6.1696	38.9231
6.1728	32	6.1728	38.8586
6.176	31	6.176	38.7966
6.1792	38	6.1792	38.7324
6.1824	40	6.1824	38.6709
6.1856	37	6.1856	38.6072
6.1888	36	6.1888	38.5461
6.192	36	6.192	38.4828
6.1952	35	6.1952	38.4221
6.1984	31	6.1984	38.3588
6.2016	40	6.2016	38.2975
6.2048	31	6.2048	38.2364
6.208	38	6.208	38.1756
6.2112	43	6.2112	38.1148
6.2144	45	6.2144	38.0542
6.2176	42	6.2176	37.9928
6.2208	45	6.2208	37.9325
6.224	40	6.224	37.8725
6.2272	44	6.2272	37.8126
6.2304	36	6.2304	37.7529
6.2336	30	6.2336	37.6934
6.2368	31	6.2368	37.633
6.24	31	6.24	37.5738
6.2432	37	6.2432	37.5148
6.2464	48	6.2464	37.4571
6.2496	35	6.2496	37.3984
6.2528	39	6.2528	37.3389
6.256	38	6.256	37.2806
6.2592	40	6.2592	37.2225
6.2624	46	6.2624	37.1655
6.2656	36	6.2656	37.1067
6.2688	31	6.2688	37.0491
6.272	34	6.272	36.9917
6.2752	41	6.2752	36.9353
6.2784	38	6.2784	36.8773
6.2816	29	6.2816	36.8203
6.2848	40	6.2848	36.7644
6.288	43	6.288	36.7069
6.2912	48	6.2912	36.6505
6.2944	38	6.2944	36.5951
6.2976	29	6.2976	36.5381
6.3008	34	6.3008	36.483
6.304	36	6.304	36.4272
6.3072	38	6.3072	36.3716
6.3104	40	6.3104	36.3162
6.3136	41	6.3136	36.2617
6.3168	34	6.3168	36.2058
6.32	31	6.32	36.1516
6.3232	29	6.3232	36.0968
6.3264	37	6.3264	36.0422
6.3296	41	6.3296	35.9885
6.3328	33	6.3328	35.9334
6.336	35	6.336	35.88
6.3392	24	6.3392	35.8268
6.3424	36	6.3424	35.7722
6.3456	46	6.3456	35.7193
6.3488	34	6.3488	35.6658
6.352	39	6.352	35.6125
6.3552	29	6.3552	35.5593
6.3584	41	6.3584	35.507
6.3616	37	6.3616	35.4541
6.3648	32	6.3648	35.4014
6.368	34	6.368	35.3496
6.3712	43	6.3712	35.2972
6.3744	22	6.3744	35.2456
6.3776	37	6.3776	35.1936
6.3808	32	6.3808	35.1423
6.384	33	6.384	35.0905
6.3872	26	6.3872	35.0389
6.3904	46	6.3904	34.9881
6.3936	35	6.3936	34.9368
[truncated: 27,026 more rows]

## Sheet: Fig3d
Time[µs]	Intensity[Cnts]	Time[µs]	Fit
0	40	0	---
0.0001	41	0.0001	---
0.0002	50	0.0002	---
0.0003	47	0.0003	---
0.0004	35	0.0004	---
0.0005	47	0.0005	---
0.0006	48	0.0006	---
0.0007	46	0.0007	---
0.0008	37	0.0008	---
0.0009	59	0.0009	---
0.001	51	0.001	---
0.0011	38	0.0011	---
0.0012	36	0.0012	---
0.0013	52	0.0013	---
0.0014	39	0.0014	---
0.0015	55	0.0015	---
0.0016	47	0.0016	---
0.0017	54	0.0017	---
0.0018	43	0.0018	---
0.0019	51	0.0019	---
0.002	48	0.002	---
0.0021	47	0.0021	---
0.0022	58	0.0022	---
0.0023	63	0.0023	---
0.0024	42	0.0024	---
0.0025	43	0.0025	---
0.0026	32	0.0026	---
0.0027	50	0.0027	---
0.0028	63	0.0028	---
0.0029	37	0.0029	---
0.003	56	0.003	---
0.0031	65	0.0031	---
0.0032	49	0.0032	---
0.0033	75	0.0033	---
0.0034	90	0.0034	---
0.0035	99	0.0035	---
0.0036	116	0.0036	---
0.0037	111	0.0037	---
0.0038	101	0.0038	---
0.0039	113	0.0039	---
0.004	97	0.004	---
0.0041	92	0.0041	---
0.0042	96	0.0042	---
0.0043	96	0.0043	---
0.0044	89	0.0044	---
0.0045	97	0.0045	---
0.0046	96	0.0046	---
0.0047	73	0.0047	---
0.0048	82	0.0048	---
0.0049	100	0.0049	---
0.005	111	0.005	---
0.0051	108	0.0051	---
0.0052	164	0.0052	---
0.0053	174	0.0053	---
0.0054	166	0.0054	---
0.0055	167	0.0055	---
0.0056	162	0.0056	---
0.0057	164	0.0057	---
0.0058	163	0.0058	---
0.0059	132	0.0059	---
0.006	154	0.006	---
0.0061	135	0.0061	---
0.0062	108	0.0062	---
0.0063	124	0.0063	---
0.0064	357	0.0064	---
0.0065	857	0.0065	---
0.0066	1276	0.0066	---
0.0067	1196	0.0067	---
0.0068	1144	0.0068	---
0.0069	1136	0.0069	---
0.007	1027	0.007	---
0.0071	1029	0.0071	---
0.0072	1013	0.0072	---
0.0073	970	0.0073	---
0.0074	937	0.0074	---
0.0075	963	0.0075	---
0.0076	977	0.0076	---
0.0077	921	0.0077	---
0.0078	925	0.0078	---
0.0079	905	0.0079	---
0.008	919	0.008	---
0.0081	914	0.0081	---
0.0082	917	0.0082	---
0.0083	886	0.0083	---
0.0084	887	0.0084	---
0.0085	872	0.0085	---
0.0086	930	0.0086	---
0.0087	927	0.0087	---
0.0088	826	0.0088	---
0.0089	911	0.0089	---
0.009	854	0.009	---
0.0091	830	0.0091	---
0.0092	852	0.0092	---
0.0093	845	0.0093	---
0.0094	861	0.0094	---
0.0095	877	0.0095	---
0.0096	805	0.0096	---
0.0097	808	0.0097	---
0.0098	843	0.0098	---
0.0099	826	0.0099	---
0.01	892	0.01	---
0.0101	800	0.0101	---
0.0102	816	0.0102	---
0.0103	867	0.0103	---
0.0104	842	0.0104	---
0.0105	830	0.0105	---
0.0106	843	0.0106	---
0.0107	819	0.0107	---
0.0108	786	0.0108	---
0.0109	813	0.0109	---
0.011	818	0.011	---
0.0111	748	0.0111	---
0.0112	767	0.0112	---
0.0113	783	0.0113	---
0.0114	764	0.0114	---
0.0115	807	0.0115	---
0.0116	805	0.0116	---
0.0117	813	0.0117	---
0.0118	758	0.0118	---
0.0119	786	0.0119	---
0.012	689	0.012	---
0.0121	795	0.0121	---
0.0122	707	0.0122	---
0.0123	748	0.0123	---
0.0124	689	0.0124	---
0.0125	727	0.0125	---
0.0126	769	0.0126	---
0.0127	657	0.0127	---
0.0128	715	0.0128	---
0.0129	714	0.0129	---
0.013	751	0.013	---
0.0131	735	0.0131	---
0.0132	668	0.0132	---
0.0133	738	0.0133	---
0.0134	728	0.0134	---
0.0135	686	0.0135	---
0.0136	719	0.0136	---
0.0137	749	0.0137	---
0.0138	656	0.0138	---
0.0139	700	0.0139	---
0.014	683	0.014	---
0.0141	651	0.0141	---
0.0142	640	0.0142	---
0.0143	702	0.0143	---
0.0144	683	0.0144	---
0.0145	643	0.0145	---
0.0146	679	0.0146	---
0.0147	660	0.0147	---
0.0148	642	0.0148	---
0.0149	649	0.0149	---
0.015	669	0.015	---
0.0151	711	0.0151	---
0.0152	634	0.0152	---
0.0153	668	0.0153	---
0.0154	641	0.0154	---
0.0155	629	0.0155	---
0.0156	680	0.0156	---
0.0157	619	0.0157	---
0.0158	664	0.0158	---
0.0159	649	0.0159	---
0.016	622	0.016	---
0.0161	609	0.0161	---
0.0162	629	0.0162	---
0.0163	657	0.0163	---
0.0164	589	0.0164	---
0.0165	624	0.0165	---
0.0166	605	0.0166	---
0.0167	638	0.0167	---
0.0168	606	0.0168	---
0.0169	603	0.0169	---
0.017	595	0.017	---
0.0171	632	0.0171	---
0.0172	588	0.0172	---
0.0173	642	0.0173	---
0.0174	594	0.0174	---
0.0175	614	0.0175	---
0.0176	586	0.0176	---
0.0177	624	0.0177	---
0.0178	611	0.0178	---
0.0179	599	0.0179	---
0.018	598	0.018	---
0.0181	549	0.0181	---
0.0182	578	0.0182	---
0.0183	567	0.0183	---
0.0184	551	0.0184	---
0.0185	573	0.0185	---
0.0186	548	0.0186	---
0.0187	582	0.0187	---
0.0188	539	0.0188	---
0.0189	586	0.0189	---
0.019	540	0.019	---
0.0191	569	0.0191	---
0.0192	539	0.0192	---
0.0193	562	0.0193	---
0.0194	584	0.0194	---
0.0195	571	0.0195	---
0.0196	538	0.0196	---
0.0197	567	0.0197	---
0.0198	545	0.0198	---
0.0199	570	0.0199	---
0.02	508	0.02	---
0.0201	544	0.0201	---
0.0202	522	0.0202	---
0.0203	520	0.0203	---
0.0204	544	0.0204	---
0.0205	577	0.0205	---
0.0206	543	0.0206	---
0.0207	508	0.0207	---
0.0208	532	0.0208	---
0.0209	548	0.0209	---
0.021	533	0.021	---
0.0211	519	0.0211	---
0.0212	549	0.0212	---
0.0213	539	0.0213	---
0.0214	532	0.0214	---
0.0215	510	0.0215	---
0.0216	491	0.0216	---
0.0217	519	0.0217	---
0.0218	497	0.0218	---
0.0219	488	0.0219	---
0.022	487	0.022	---
0.0221	515	0.0221	---
0.0222	516	0.0222	---
0.0223	499	0.0223	---
0.0224	510	0.0224	---
0.0225	517	0.0225	---
0.0226	520	0.0226	---
0.0227	463	0.0227	---
0.0228	533	0.0228	---
0.0229	486	0.0229	---
0.023	482	0.023	---
0.0231	494	0.0231	---
0.0232	487	0.0232	---
0.0233	474	0.0233	---
0.0234	504	0.0234	---
0.0235	536	0.0235	---
0.0236	497	0.0236	---
0.0237	474	0.0237	---
0.0238	505	0.0238	---
0.0239	454	0.0239	---
0.024	512	0.024	---
0.0241	487	0.0241	---
0.0242	477	0.0242	---
0.0243	478	0.0243	---
0.0244	480	0.0244	---
0.0245	497	0.0245	---
0.0246	479	0.0246	---
0.0247	473	0.0247	---
0.0248	469	0.0248	---
0.0249	472	0.0249	---
0.025	430	0.025	---
0.0251	446	0.0251	---
0.0252	500	0.0252	---
0.0253	471	0.0253	---
0.0254	494	0.0254	---
0.0255	435	0.0255	---
0.0256	443	0.0256	---
0.0257	431	0.0257	---
0.0258	453	0.0258	---
0.0259	449	0.0259	---
0.026	481	0.026	---
0.0261	443	0.0261	---
0.0262	427	0.0262	---
0.0263	458	0.0263	---
0.0264	469	0.0264	---
0.0265	455	0.0265	---
0.0266	416	0.0266	---
0.0267	400	0.0267	---
0.0268	437	0.0268	---
0.0269	433	0.0269	---
0.027	458	0.027	---
0.0271	459	0.0271	---
0.0272	469	0.0272	---
0.0273	428	0.0273	---
0.0274	419	0.0274	---
0.0275	442	0.0275	---
0.0276	431	0.0276	---
0.0277	441	0.0277	---
0.0278	446	0.0278	---
0.0279	421	0.0279	---
0.028	473	0.028	---
0.0281	429	0.0281	---
0.0282	438	0.0282	---
0.0283	536	0.0283	---
0.0284	512	0.0284	---
0.0285	483	0.0285	---
0.0286	512	0.0286	---
0.0287	444	0.0287	---
0.0288	461	0.0288	---
0.0289	516	0.0289	---
0.029	476	0.029	---
0.0291	474	0.0291	---
0.0292	486	0.0292	---
0.0293	463	0.0293	---
0.0294	453	0.0294	---
0.0295	465	0.0295	---
0.0296	452	0.0296	---
0.0297	413	0.0297	---
0.0298	456	0.0298	---
0.0299	450	0.0299	---
0.03	473	0.03	---
0.0301	528	0.0301	---
0.0302	544	0.0302	---
0.0303	547	0.0303	---
0.0304	563	0.0304	---
0.0305	483	0.0305	---
0.0306	512	0.0306	---
0.0307	489	0.0307	---
0.0308	511	0.0308	---
0.0309	493	0.0309	---
0.031	527	0.031	---
0.0311	501	0.0311	---
0.0312	533	0.0312	---
0.0313	811	0.0313	---
0.0314	1299	0.0314	---
0.0315	1760	0.0315	---
0.0316	1706	0.0316	---
0.0317	1493	0.0317	---
0.0318	1511	0.0318	---
0.0319	1512	0.0319	---
0.032	1422	0.032	---
0.0321	1424	0.0321	---
0.0322	1426	0.0322	---
0.0323	1313	0.0323	---
0.0324	1398	0.0324	---
0.0325	1343	0.0325	---
0.0326	1391	0.0326	---
0.0327	1343	0.0327	---
0.0328	1328	0.0328	---
0.0329	1302	0.0329	---
0.033	1289	0.033	---
0.0331	1317	0.0331	---
0.0332	1329	0.0332	---
0.0333	1286	0.0333	---
0.0334	1226	0.0334	---
0.0335	1351	0.0335	---
0.0336	1299	0.0336	---
0.0337	1290	0.0337	---
0.0338	1213	0.0338	---
0.0339	1249	0.0339	---
0.034	1191	0.034	---
0.0341	1181	0.0341	---
0.0342	1230	0.0342	---
0.0343	1176	0.0343	---
0.0344	1175	0.0344	---
0.0345	1236	0.0345	---
0.0346	1187	0.0346	---
0.0347	1224	0.0347	---
0.0348	1212	0.0348	---
0.0349	1202	0.0349	---
0.035	1151	0.035	---
0.0351	1227	0.0351	---
0.0352	1207	0.0352	---
0.0353	1162	0.0353	---
0.0354	1156	0.0354	---
0.0355	1102	0.0355	---
0.0356	1160	0.0356	---
0.0357	1143	0.0357	---
0.0358	1093	0.0358	---
0.0359	1149	0.0359	---
0.036	1090	0.036	---
0.0361	1132	0.0361	---
0.0362	1104	0.0362	---
0.0363	1158	0.0363	---
0.0364	1095	0.0364	---
0.0365	1101	0.0365	---
0.0366	1089	0.0366	---
0.0367	1149	0.0367	---
0.0368	1130	0.0368	---
0.0369	1065	0.0369	---
0.037	1058	0.037	---
0.0371	1079	0.0371	---
0.0372	1159	0.0372	---
0.0373	1011	0.0373	---
0.0374	1056	0.0374	---
0.0375	1088	0.0375	---
0.0376	1068	0.0376	---
0.0377	1045	0.0377	---
0.0378	1027	0.0378	---
0.0379	1021	0.0379	---
0.038	1045	0.038	---
0.0381	1084	0.0381	---
0.0382	982	0.0382	---
0.0383	1029	0.0383	---
0.0384	1011	0.0384	---
0.0385	1033	0.0385	---
0.0386	989	0.0386	---
0.0387	998	0.0387	---
0.0388	941	0.0388	---
0.0389	1056	0.0389	---
0.039	988	0.039	---
0.0391	1030	0.0391	---
0.0392	1000	0.0392	---
0.0393	987	0.0393	---
0.0394	1029	0.0394	---
0.0395	930	0.0395	---
0.0396	989	0.0396	---
0.0397	968	0.0397	---
0.0398	977	0.0398	---
0.0399	975	0.0399	---
0.04	955	0.04	---
0.0401	921	0.0401	---
0.0402	960	0.0402	---
0.0403	929	0.0403	---
0.0404	963	0.0404	---
0.0405	952	0.0405	---
0.0406	957	0.0406	---
0.0407	946	0.0407	---
0.0408	897	0.0408	---
0.0409	934	0.0409	---
0.041	896	0.041	---
0.0411	917	0.0411	---
0.0412	928	0.0412	---
0.0413	928	0.0413	---
0.0414	907	0.0414	---
0.0415	884	0.0415	---
0.0416	914	0.0416	---
0.0417	939	0.0417	---
0.0418	900	0.0418	---
0.0419	849	0.0419	---
0.042	931	0.042	---
0.0421	901	0.0421	---
0.0422	905	0.0422	---
0.0423	920	0.0423	---
0.0424	821	0.0424	---
0.0425	904	0.0425	---
0.0426	888	0.0426	---
0.0427	880	0.0427	---
0.0428	814	0.0428	---
0.0429	860	0.0429	---
0.043	896	0.043	---
0.0431	886	0.0431	---
0.0432	852	0.0432	---
0.0433	937	0.0433	---
0.0434	846	0.0434	---
0.0435	828	0.0435	---
0.0436	818	0.0436	---
0.0437	816	0.0437	---
0.0438	830	0.0438	---
0.0439	826	0.0439	---
0.044	803	0.044	---
0.0441	786	0.0441	---
0.0442	839	0.0442	---
0.0443	863	0.0443	---
0.0444	821	0.0444	---
0.0445	841	0.0445	---
0.0446	849	0.0446	---
0.0447	830	0.0447	---
0.0448	813	0.0448	---
0.0449	761	0.0449	---
0.045	842	0.045	---
0.0451	806	0.0451	---
0.0452	842	0.0452	---
0.0453	812	0.0453	---
0.0454	817	0.0454	---
0.0455	766	0.0455	---
0.0456	766	0.0456	---
0.0457	800	0.0457	---
0.0458	790	0.0458	---
0.0459	797	0.0459	---
0.046	826	0.046	---
0.0461	809	0.0461	---
0.0462	744	0.0462	---
0.0463	775	0.0463	---
0.0464	766	0.0464	---
0.0465	764	0.0465	---
0.0466	794	0.0466	---
0.0467	752	0.0467	---
0.0468	814	0.0468	---
0.0469	751	0.0469	---
0.047	820	0.047	---
0.0471	780	0.0471	---
0.0472	734	0.0472	---
0.0473	753	0.0473	---
0.0474	719	0.0474	---
0.0475	718	0.0475	---
0.0476	750	0.0476	---
0.0477	767	0.0477	---
0.0478	751	0.0478	---
0.0479	749	0.0479	---
0.048	806	0.048	---
0.0481	727	0.0481	---
0.0482	735	0.0482	---
0.0483	700	0.0483	---
0.0484	718	0.0484	---
0.0485	754	0.0485	---
0.0486	748	0.0486	---
0.0487	791	0.0487	---
0.0488	700	0.0488	---
0.0489	732	0.0489	---
0.049	714	0.049	---
0.0491	739	0.0491	---
0.0492	669	0.0492	---
0.0493	690	0.0493	---
0.0494	740	0.0494	---
0.0495	647	0.0495	---
0.0496	685	0.0496	---
0.0497	677	0.0497	---
0.0498	716	0.0498	---
0.0499	723	0.0499	---
0.05	657	0.05	---
0.0501	685	0.0501	---
0.0502	697	0.0502	---
0.0503	660	0.0503	---
0.0504	697	0.0504	---
0.0505	648	0.0505	---
0.0506	672	0.0506	---
0.0507	663	0.0507	---
0.0508	650	0.0508	---
0.0509	668	0.0509	---
0.051	664	0.051	---
0.0511	655	0.0511	---
0.0512	701	0.0512	---
0.0513	662	0.0513	---
0.0514	669	0.0514	---
0.0515	693	0.0515	---
0.0516	625	0.0516	---
0.0517	663	0.0517	---
0.0518	684	0.0518	---
0.0519	634	0.0519	---
0.052	653	0.052	---
0.0521	649	0.0521	---
0.0522	637	0.0522	---
0.0523	621	0.0523	---
0.0524	693	0.0524	---
0.0525	654	0.0525	---
0.0526	682	0.0526	---
0.0527	663	0.0527	---
0.0528	670	0.0528	---
0.0529	634	0.0529	---
0.053	714	0.053	---
0.0531	688	0.0531	---
0.0532	620	0.0532	---
0.0533	676	0.0533	---
0.0534	718	0.0534	---
0.0535	742	0.0535	---
0.0536	715	0.0536	---
0.0537	684	0.0537	---
0.0538	753	0.0538	---
0.0539	657	0.0539	---
0.054	701	0.054	---
0.0541	645	0.0541	---
0.0542	610	0.0542	---
0.0543	685	0.0543	---
0.0544	664	0.0544	---
0.0545	623	0.0545	---
0.0546	638	0.0546	---
0.0547	637	0.0547	---
0.0548	663	0.0548	---
0.0549	690	0.0549	---
0.055	730	0.055	---
0.0551	678	0.0551	---
0.0552	731	0.0552	---
0.0553	749	0.0553	---
0.0554	760	0.0554	---
0.0555	722	0.0555	---
0.0556	741	0.0556	---
0.0557	698	0.0557	---
0.0558	729	0.0558	---
0.0559	641	0.0559	---
0.056	707	0.056	---
0.0561	673	0.0561	---
0.0562	665	0.0562	---
0.0563	974	0.0563	---
0.0564	1578	0.0564	---
0.0565	1923	0.0565	---
0.0566	1973	0.0566	---
0.0567	1851	0.0567	---
0.0568	1770	0.0568	---
0.0569	1735	0.0569	---
0.057	1616	0.057	---
0.0571	1644	0.0571	---
0.0572	1683	0.0572	---
0.0573	1623	0.0573	---
0.0574	1688	0.0574	---
0.0575	1564	0.0575	---
0.0576	1528	0.0576	---
0.0577	1592	0.0577	---
0.0578	1524	0.0578	---
0.0579	1540	0.0579	---
0.058	1590	0.058	---
0.0581	1564	0.0581	---
0.0582	1449	0.0582	---
0.0583	1514	0.0583	---
0.0584	1559	0.0584	---
0.0585	1478	0.0585	---
0.0586	1545	0.0586	---
0.0587	1437	0.0587	---
0.0588	1454	0.0588	---
0.0589	1483	0.0589	---
0.059	1439	0.059	---
0.0591	1483	0.0591	---
0.0592	1462	0.0592	---
0.0593	1455	0.0593	---
0.0594	1439	0.0594	---
0.0595	1421	0.0595	---
0.0596	1412	0.0596	---
0.0597	1473	0.0597	---
0.0598	1344	0.0598	---
0.0599	1399	0.0599	---
0.06	1375	0.06	---
0.0601	1393	0.0601	---
0.0602	1320	0.0602	---
0.0603	1343	0.0603	---
0.0604	1322	0.0604	---
0.0605	1344	0.0605	---
0.0606	1395	0.0606	---
0.0607	1296	0.0607	---
0.0608	1400	0.0608	---
0.0609	1366	0.0609	---
0.061	1359	0.061	---
0.0611	1304	0.0611	---
0.0612	1375	0.0612	---
0.0613	1349	0.0613	---
0.0614	1338	0.0614	---
0.0615	1303	0.0615	---
0.0616	1327	0.0616	---
0.0617	1304	0.0617	---
0.0618	1327	0.0618	---
0.0619	1250	0.0619	---
0.062	1260	0.062	---
0.0621	1257	0.0621	---
0.0622	1293	0.0622	---
0.0623	1308	0.0623	---
0.0624	1212	0.0624	---
0.0625	1241	0.0625	---
0.0626	1250	0.0626	---
0.0627	1222	0.0627	---
0.0628	1279	0.0628	---
0.0629	1191	0.0629	---
0.063	1219	0.063	---
0.0631	1239	0.0631	---
0.0632	1224	0.0632	---
0.0633	1255	0.0633	---
0.0634	1202	0.0634	---
0.0635	1197	0.0635	---
0.0636	1161	0.0636	---
0.0637	1185	0.0637	---
0.0638	1230	0.0638	---
0.0639	1160	0.0639	---
0.064	1195	0.064	---
0.0641	1228	0.0641	---
0.0642	1162	0.0642	---
0.0643	1153	0.0643	---
0.0644	1144	0.0644	---
0.0645	1138	0.0645	---
0.0646	1099	0.0646	---
0.0647	1194	0.0647	---
0.0648	1145	0.0648	---
0.0649	1131	0.0649	---
0.065	1182	0.065	---
0.0651	1161	0.0651	---
0.0652	1137	0.0652	---
0.0653	1200	0.0653	---
0.0654	1160	0.0654	---
0.0655	1154	0.0655	---
0.0656	1054	0.0656	---
0.0657	1108	0.0657	---
0.0658	1162	0.0658	---
0.0659	1141	0.0659	---
0.066	1150	0.066	---
0.0661	1095	0.0661	---
0.0662	1144	0.0662	---
0.0663	1069	0.0663	---
0.0664	1086	0.0664	---
0.0665	1092	0.0665	---
0.0666	1062	0.0666	---
0.0667	1043	0.0667	---
0.0668	1031	0.0668	---
0.0669	1062	0.0669	---
0.067	1129	0.067	---
0.0671	1065	0.0671	---
0.0672	1081	0.0672	---
0.0673	1019	0.0673	---
0.0674	1056	0.0674	---
0.0675	1079	0.0675	---
0.0676	1066	0.0676	---
0.0677	997	0.0677	---
0.0678	1001	0.0678	---
0.0679	1016	0.0679	---
0.068	1055	0.068	---
0.0681	1031	0.0681	---
0.0682	1013	0.0682	---
0.0683	976	0.0683	---
0.0684	1005	0.0684	---
0.0685	1027	0.0685	---
0.0686	988	0.0686	---
0.0687	973	0.0687	---
0.0688	1039	0.0688	---
0.0689	993	0.0689	---
0.069	987	0.069	---
0.0691	982	0.0691	---
0.0692	1080	0.0692	---
0.0693	979	0.0693	---
0.0694	999	0.0694	---
0.0695	1026	0.0695	---
0.0696	1048	0.0696	---
0.0697	957	0.0697	---
0.0698	1026	0.0698	---
0.0699	999	0.0699	---
0.07	988	0.07	---
0.0701	960	0.0701	---
0.0702	924	0.0702	---
0.0703	931	0.0703	---
0.0704	978	0.0704	---
0.0705	932	0.0705	---
0.0706	934	0.0706	---
0.0707	977	0.0707	---
0.0708	970	0.0708	---
0.0709	999	0.0709	---
0.071	910	0.071	---
0.0711	917	0.0711	---
0.0712	937	0.0712	---
0.0713	915	0.0713	---
0.0714	925	0.0714	---
0.0715	962	0.0715	---
0.0716	976	0.0716	---
0.0717	877	0.0717	---
0.0718	861	0.0718	---
0.0719	921	0.0719	---
0.072	869	0.072	---
0.0721	929	0.0721	---
0.0722	913	0.0722	---
0.0723	916	0.0723	---
0.0724	921	0.0724	---
0.0725	859	0.0725	---
0.0726	919	0.0726	---
0.0727	892	0.0727	---
0.0728	858	0.0728	---
0.0729	917	0.0729	---
0.073	918	0.073	---
0.0731	837	0.0731	---
0.0732	882	0.0732	---
0.0733	870	0.0733	---
0.0734	890	0.0734	---
0.0735	870	0.0735	---
0.0736	929	0.0736	---
0.0737	863	0.0737	---
0.0738	887	0.0738	---
0.0739	868	0.0739	---
0.074	880	0.074	---
0.0741	887	0.0741	---
0.0742	808	0.0742	---
0.0743	796	0.0743	---
0.0744	877	0.0744	---
0.0745	853	0.0745	---
0.0746	897	0.0746	---
0.0747	877	0.0747	---
0.0748	809	0.0748	---
0.0749	863	0.0749	---
0.075	830	0.075	---
0.0751	832	0.0751	---
0.0752	781	0.0752	---
0.0753	860	0.0753	---
0.0754	829	0.0754	---
0.0755	810	0.0755	---
0.0756	768	0.0756	---
0.0757	796	0.0757	---
0.0758	828	0.0758	---
0.0759	823	0.0759	---
0.076	839	0.076	---
0.0761	782	0.0761	---
0.0762	801	0.0762	---
0.0763	824	0.0763	---
0.0764	808	0.0764	---
0.0765	840	0.0765	---
0.0766	761	0.0766	---
0.0767	764	0.0767	---
0.0768	825	0.0768	---
0.0769	776	0.0769	---
0.077	792	0.077	---
0.0771	821	0.0771	---
0.0772	795	0.0772	---
0.0773	772	0.0773	---
0.0774	799	0.0774	---
0.0775	815	0.0775	---
0.0776	823	0.0776	---
0.0777	775	0.0777	---
0.0778	796	0.0778	---
0.0779	783	0.0779	---
0.078	731	0.078	---
0.0781	733	0.0781	---
0.0782	822	0.0782	---
0.0783	870	0.0783	---
0.0784	841	0.0784	---
0.0785	814	0.0785	---
0.0786	845	0.0786	---
0.0787	844	0.0787	---
0.0788	790	0.0788	---
0.0789	803	0.0789	---
0.079	803	0.079	---
0.0791	767	0.0791	---
0.0792	786	0.0792	---
0.0793	834	0.0793	---
0.0794	726	0.0794	---
0.0795	772	0.0795	---
0.0796	807	0.0796	---
0.0797	788	0.0797	---
0.0798	784	0.0798	---
0.0799	778	0.0799	---
0.08	829	0.08	---
0.0801	851	0.0801	---
0.0802	877	0.0802	---
0.0803	824	0.0803	---
0.0804	891	0.0804	---
0.0805	848	0.0805	---
0.0806	823	0.0806	---
0.0807	805	0.0807	---
0.0808	838	0.0808	---
0.0809	801	0.0809	---
0.081	850	0.081	---
0.0811	804	0.0811	---
0.0812	824	0.0812	---
0.0813	1002	0.0813	---
0.0814	1722	0.0814	---
0.0815	2020	0.0815	---
0.0816	2051	0.0816	---
0.0817	1971	0.0817	---
0.0818	1834	0.0818	---
0.0819	1781	0.0819	---
0.082	1799	0.082	---
0.0821	1719	0.0821	---
0.0822	1742	0.0822	---
0.0823	1736	0.0823	---
0.0824	1698	0.0824	---
0.0825	1628	0.0825	---
0.0826	1693	0.0826	---
0.0827	1683	0.0827	---
0.0828	1601	0.0828	---
0.0829	1694	0.0829	---
0.083	1660	0.083	---
0.0831	1655	0.0831	---
0.0832	1685	0.0832	---
0.0833	1579	0.0833	---
0.0834	1692	0.0834	---
0.0835	1605	0.0835	---
0.0836	1602	0.0836	---
0.0837	1626	0.0837	---
0.0838	1555	0.0838	---
0.0839	1560	0.0839	---
0.084	1534	0.084	---
0.0841	1517	0.0841	---
0.0842	1554	0.0842	---
0.0843	1590	0.0843	---
0.0844	1511	0.0844	---
0.0845	1540	0.0845	---
0.0846	1530	0.0846	---
0.0847	1577	0.0847	---
0.0848	1497	0.0848	---
0.0849	1522	0.0849	---
0.085	1507	0.085	---
0.0851	1576	0.0851	---
0.0852	1459	0.0852	---
0.0853	1459	0.0853	---
0.0854	1499	0.0854	---
0.0855	1460	0.0855	---
0.0856	1443	0.0856	---
0.0857	1480	0.0857	---
0.0858	1435	0.0858	---
0.0859	1471	0.0859	---
0.086	1462	0.086	---
0.0861	1431	0.0861	---
0.0862	1468	0.0862	---
0.0863	1390	0.0863	---
0.0864	1325	0.0864	---
0.0865	1481	0.0865	---
0.0866	1458	0.0866	---
0.0867	1407	0.0867	---
0.0868	1412	0.0868	---
0.0869	1404	0.0869	---
0.087	1419	0.087	---
0.0871	1387	0.0871	---
0.0872	1365	0.0872	---
0.0873	1369	0.0873	---
0.0874	1428	0.0874	---
0.0875	1379	0.0875	---
0.0876	1410	0.0876	---
0.0877	1380	0.0877	---
0.0878	1400	0.0878	---
0.0879	1346	0.0879	---
0.088	1304	0.088	---
0.0881	1359	0.0881	---
0.0882	1275	0.0882	---
0.0883	1294	0.0883	---
0.0884	1299	0.0884	---
0.0885	1365	0.0885	---
0.0886	1271	0.0886	---
0.0887	1320	0.0887	---
0.0888	1259	0.0888	---
0.0889	1309	0.0889	---
0.089	1318	0.089	---
0.0891	1263	0.0891	---
0.0892	1284	0.0892	---
0.0893	1321	0.0893	---
0.0894	1241	0.0894	---
0.0895	1270	0.0895	---
0.0896	1332	0.0896	---
0.0897	1258	0.0897	---
0.0898	1230	0.0898	---
0.0899	1237	0.0899	---
0.09	1206	0.09	---
0.0901	1231	0.0901	---
0.0902	1229	0.0902	---
0.0903	1200	0.0903	---
0.0904	1257	0.0904	---
0.0905	1233	0.0905	---
0.0906	1229	0.0906	---
0.0907	1220	0.0907	---
0.0908	1217	0.0908	---
0.0909	1177	0.0909	---
0.091	1218	0.091	---
0.0911	1236	0.0911	---
0.0912	1243	0.0912	---
0.0913	1211	0.0913	---
0.0914	1163	0.0914	---
0.0915	1201	0.0915	---
0.0916	1275	0.0916	---
0.0917	1206	0.0917	---
0.0918	1190	0.0918	---
0.0919	1175	0.0919	---
0.092	1192	0.092	---
0.0921	1193	0.0921	---
0.0922	1125	0.0922	---
0.0923	1102	0.0923	---
0.0924	1096	0.0924	---
0.0925	1172	0.0925	---
0.0926	1212	0.0926	---
0.0927	1136	0.0927	---
0.0928	1187	0.0928	---
0.0929	1137	0.0929	---
0.093	1123	0.093	---
0.0931	1122	0.0931	---
0.0932	1116	0.0932	---
0.0933	1080	0.0933	---
0.0934	1115	0.0934	---
0.0935	1133	0.0935	---
0.0936	1070	0.0936	---
0.0937	1118	0.0937	---
0.0938	1087	0.0938	---
0.0939	1096	0.0939	---
0.094	1118	0.094	---
0.0941	1089	0.0941	---
0.0942	1075	0.0942	---
0.0943	1092	0.0943	---
0.0944	1093	0.0944	---
0.0945	1125	0.0945	---
0.0946	1051	0.0946	---
0.0947	1018	0.0947	---
0.0948	1045	0.0948	---
0.0949	1081	0.0949	---
0.095	1013	0.095	---
0.0951	1016	0.0951	---
0.0952	1101	0.0952	---
0.0953	1082	0.0953	---
0.0954	1061	0.0954	---
0.0955	1055	0.0955	---
0.0956	1047	0.0956	---
0.0957	1063	0.0957	---
0.0958	1031	0.0958	---
0.0959	1081	0.0959	---
0.096	1004	0.096	---
0.0961	1042	0.0961	---
0.0962	1017	0.0962	---
0.0963	1025	0.0963	---
0.0964	1018	0.0964	---
0.0965	1042	0.0965	---
0.0966	1000	0.0966	---
0.0967	985	0.0967	---
0.0968	1005	0.0968	---
0.0969	1007	0.0969	---
0.097	990	0.097	---
0.0971	973	0.0971	---
0.0972	947	0.0972	---
0.0973	976	0.0973	---
0.0974	1012	0.0974	---
0.0975	1057	0.0975	---
0.0976	1000	0.0976	---
0.0977	963	0.0977	---
0.0978	1038	0.0978	---
0.0979	977	0.0979	---
0.098	985	0.098	---
0.0981	941	0.0981	---
0.0982	948	0.0982	---
0.0983	942	0.0983	---
0.0984	953	0.0984	---
0.0985	972	0.0985	---
0.0986	925	0.0986	---
0.0987	924	0.0987	---
0.0988	884	0.0988	---
0.0989	941	0.0989	---
0.099	916	0.099	---
0.0991	976	0.0991	---
0.0992	930	0.0992	---
0.0993	998	0.0993	---
0.0994	901	0.0994	---
0.0995	918	0.0995	---
0.0996	938	0.0996	---
0.0997	903	0.0997	---
0.0998	892	0.0998	---
0.0999	986	0.0999	---
0.1	964	0.1	---
0.1001	941	0.1001	---
0.1002	910	0.1002	---
0.1003	910	0.1003	---
0.1004	862	0.1004	---
0.1005	924	0.1005	---
0.1006	905	0.1006	---
0.1007	920	0.1007	---
0.1008	936	0.1008	---
0.1009	898	0.1009	---
0.101	880	0.101	---
0.1011	867	0.1011	---
0.1012	854	0.1012	---
0.1013	860	0.1013	---
0.1014	879	0.1014	---
0.1015	872	0.1015	---
0.1016	914	0.1016	---
0.1017	893	0.1017	---
0.1018	901	0.1018	---
0.1019	910	0.1019	---
0.102	930	0.102	---
0.1021	851	0.1021	---
0.1022	835	0.1022	---
0.1023	881	0.1023	---
0.1024	845	0.1024	---
0.1025	833	0.1025	---
0.1026	887	0.1026	---
0.1027	851	0.1027	---
0.1028	854	0.1028	---
0.1029	833	0.1029	---
0.103	853	0.103	---
0.1031	889	0.1031	---
0.1032	820	0.1032	---
0.1033	876	0.1033	---
0.1034	921	0.1034	---
0.1035	857	0.1035	---
0.1036	906	0.1036	---
0.1037	870	0.1037	---
0.1038	882	0.1038	---
0.1039	899	0.1039	---
0.104	889	0.104	---
0.1041	878	0.1041	---
0.1042	882	0.1042	---
0.1043	818	0.1043	---
0.1044	855	0.1044	---
0.1045	818	0.1045	---
0.1046	847	0.1046	---
0.1047	827	0.1047	---
0.1048	845	0.1048	---
0.1049	846	0.1049	---
0.105	891	0.105	---
0.1051	926	0.1051	---
0.1052	878	0.1052	---
0.1053	963	0.1053	---
0.1054	959	0.1054	---
0.1055	924	0.1055	---
0.1056	892	0.1056	---
0.1057	914	0.1057	---
0.1058	884	0.1058	---
0.1059	874	0.1059	---
0.106	876	0.106	---
0.1061	903	0.1061	---
0.1062	862	0.1062	---
0.1063	1122	0.1063	---
0.1064	1705	0.1064	---
0.1065	2129	0.1065	---
0.1066	2185	0.1066	---
0.1067	1969	0.1067	---
0.1068	2021	0.1068	---
0.1069	1822	0.1069	---
0.107	1820	0.107	---
0.1071	1833	0.1071	---
0.1072	1906	0.1072	---
0.1073	1775	0.1073	---
0.1074	1791	0.1074	---
0.1075	1817	0.1075	---
0.1076	1737	0.1076	---
0.1077	1805	0.1077	---
0.1078	1776	0.1078	---
0.1079	1811	0.1079	---
0.108	1698	0.108	---
0.1081	1724	0.1081	---
0.1082	1764	0.1082	---
0.1083	1696	0.1083	---
0.1084	1784	0.1084	---
0.1085	1650	0.1085	---
0.1086	1651	0.1086	---
0.1087	1700	0.1087	---
0.1088	1674	0.1088	---
0.1089	1683	0.1089	---
0.109	1603	0.109	---
0.1091	1653	0.1091	---
0.1092	1728	0.1092	---
0.1093	1650	0.1093	---
0.1094	1582	0.1094	---
0.1095	1626	0.1095	---
0.1096	1557	0.1096	---
0.1097	1590	0.1097	---
0.1098	1665	0.1098	---
0.1099	1624	0.1099	---
0.11	1596	0.11	---
0.1101	1531	0.1101	---
0.1102	1553	0.1102	---
0.1103	1553	0.1103	---
0.1104	1626	0.1104	---
0.1105	1576	0.1105	---
0.1106	1624	0.1106	---
0.1107	1570	0.1107	---
0.1108	1511	0.1108	---
0.1109	1607	0.1109	---
0.111	1465	0.111	---
0.1111	1512	0.1111	---
0.1112	1488	0.1112	---
0.1113	1478	0.1113	---
0.1114	1510	0.1114	---
0.1115	1475	0.1115	---
0.1116	1528	0.1116	---
0.1117	1468	0.1117	---
0.1118	1468	0.1118	---
0.1119	1451	0.1119	---
0.112	1496	0.112	---
0.1121	1463	0.1121	---
0.1122	1477	0.1122	---
0.1123	1477	0.1123	---
0.1124	1453	0.1124	---
0.1125	1466	0.1125	---
0.1126	1421	0.1126	---
0.1127	1396	0.1127	---
0.1128	1443	0.1128	---
0.1129	1386	0.1129	---
0.113	1416	0.113	---
0.1131	1467	0.1131	---
0.1132	1438	0.1132	---
0.1133	1357	0.1133	---
0.1134	1467	0.1134	---
0.1135	1378	0.1135	---
0.1136	1322	0.1136	---
0.1137	1372	0.1137	---
0.1138	1388	0.1138	---
0.1139	1309	0.1139	---
0.114	1335	0.114	---
0.1141	1383	0.1141	---
0.1142	1334	0.1142	---
0.1143	1318	0.1143	---
0.1144	1375	0.1144	---
0.1145	1363	0.1145	---
0.1146	1372	0.1146	---
0.1147	1301	0.1147	---
0.1148	1363	0.1148	---
0.1149	1302	0.1149	---
0.115	1358	0.115	---
0.1151	1275	0.1151	---
0.1152	1297	0.1152	---
0.1153	1369	0.1153	---
0.1154	1283	0.1154	---
0.1155	1340	0.1155	---
0.1156	1289	0.1156	---
0.1157	1343	0.1157	---
0.1158	1305	0.1158	---
0.1159	1238	0.1159	---
0.116	1264	0.116	---
0.1161	1296	0.1161	---
0.1162	1199	0.1162	---
0.1163	1306	0.1163	---
0.1164	1245	0.1164	---
0.1165	1235	0.1165	---
0.1166	1295	0.1166	---
0.1167	1279	0.1167	---
0.1168	1247	0.1168	---
0.1169	1185	0.1169	---
0.117	1242	0.117	---
0.1171	1183	0.1171	---
0.1172	1211	0.1172	---
0.1173	1186	0.1173	---
0.1174	1222	0.1174	---
0.1175	1197	0.1175	---
0.1176	1230	0.1176	---
0.1177	1230	0.1177	---
0.1178	1192	0.1178	---
0.1179	1182	0.1179	---
0.118	1207	0.118	---
0.1181	1201	0.1181	---
0.1182	1180	0.1182	---
0.1183	1230	0.1183	---
0.1184	1243	0.1184	---
0.1185	1129	0.1185	---
0.1186	1237	0.1186	---
0.1187	1215	0.1187	---
0.1188	1163	0.1188	---
0.1189	1208	0.1189	---
0.119	1143	0.119	---
0.1191	1178	0.1191	---
0.1192	1201	0.1192	---
0.1193	1100	0.1193	---
0.1194	1149	0.1194	---
0.1195	1128	0.1195	---
0.1196	1150	0.1196	---
0.1197	1105	0.1197	---
0.1198	1146	0.1198	---
0.1199	1175	0.1199	---
0.12	1142	0.12	---
0.1201	1154	0.1201	---
0.1202	1133	0.1202	---
0.1203	1103	0.1203	---
0.1204	1183	0.1204	---
0.1205	1152	0.1205	---
0.1206	1134	0.1206	---
0.1207	1137	0.1207	---
0.1208	1062	0.1208	---
0.1209	1102	0.1209	---
0.121	1070	0.121	---
0.1211	1092	0.1211	---
0.1212	1094	0.1212	---
0.1213	1118	0.1213	---
0.1214	1079	0.1214	---
0.1215	1053	0.1215	---
0.1216	1046	0.1216	---
0.1217	1137	0.1217	---
0.1218	1104	0.1218	---
0.1219	1075	0.1219	---
0.122	1024	0.122	---
0.1221	1070	0.1221	---
0.1222	1021	0.1222	---
0.1223	1115	0.1223	---
0.1224	997	0.1224	---
0.1225	1053	0.1225	---
0.1226	1029	0.1226	---
0.1227	1019	0.1227	---
0.1228	1028	0.1228	---
0.1229	1000	0.1229	---
0.123	950	0.123	---
0.1231	1028	0.1231	---
0.1232	1027	0.1232	---
0.1233	1095	0.1233	---
0.1234	1003	0.1234	---
0.1235	984	0.1235	---
0.1236	997	0.1236	---
0.1237	1016	0.1237	---
0.1238	1031	0.1238	---
0.1239	964	0.1239	---
0.124	1007	0.124	---
0.1241	1013	0.1241	---
0.1242	1019	0.1242	---
0.1243	989	0.1243	---
0.1244	1020	0.1244	---
0.1245	984	0.1245	---
0.1246	999	0.1246	---
0.1247	954	0.1247	---
0.1248	983	0.1248	---
0.1249	1001	0.1249	---
0.125	1007	0.125	---
0.1251	965	0.1251	---
0.1252	933	0.1252	---
0.1253	1015	0.1253	---
0.1254	979	0.1254	---
0.1255	979	0.1255	---
0.1256	996	0.1256	---
0.1257	893	0.1257	---
0.1258	947	0.1258	---
0.1259	954	0.1259	---
0.126	922	0.126	---
0.1261	906	0.1261	---
0.1262	929	0.1262	---
0.1263	907	0.1263	---
0.1264	933	0.1264	---
0.1265	889	0.1265	---
0.1266	911	0.1266	---
0.1267	902	0.1267	---
0.1268	933	0.1268	---
0.1269	937	0.1269	---
0.127	975	0.127	---
0.1271	900	0.1271	---
0.1272	889	0.1272	---
0.1273	880	0.1273	---
0.1274	922	0.1274	---
0.1275	876	0.1275	---
0.1276	910	0.1276	---
0.1277	968	0.1277	---
0.1278	911	0.1278	---
0.1279	867	0.1279	---
0.128	898	0.128	---
0.1281	867	0.1281	---
0.1282	927	0.1282	---
0.1283	936	0.1283	---
0.1284	984	0.1284	---
0.1285	983	0.1285	---
0.1286	991	0.1286	---
0.1287	989	0.1287	---
0.1288	997	0.1288	---
0.1289	993	0.1289	---
0.129	891	0.129	---
0.1291	941	0.1291	---
0.1292	993	0.1292	---
0.1293	873	0.1293	---
0.1294	866	0.1294	---
0.1295	917	0.1295	---
0.1296	947	0.1296	---
0.1297	836	0.1297	---
0.1298	861	0.1298	---
0.1299	946	0.1299	---
0.13	996	0.13	---
0.1301	987	0.1301	---
0.1302	976	0.1302	---
0.1303	974	0.1303	---
0.1304	998	0.1304	---
0.1305	959	0.1305	---
0.1306	1004	0.1306	---
0.1307	930	0.1307	---
0.1308	1017	0.1308	---
0.1309	903	0.1309	---
0.131	924	0.131	---
0.1311	907	0.1311	---
0.1312	964	0.1312	---
0.1313	1193	0.1313	---
0.1314	1904	0.1314	---
0.1315	2159	0.1315	---
0.1316	2206	0.1316	---
0.1317	2133	0.1317	---
0.1318	1997	0.1318	---
0.1319	2018	0.1319	---
0.132	2014	0.132	---
0.1321	1951	0.1321	---
0.1322	1938	0.1322	---
0.1323	1851	0.1323	---
0.1324	1852	0.1324	---
0.1325	1853	0.1325	---
0.1326	1901	0.1326	---
0.1327	1835	0.1327	---
0.1328	1796	0.1328	---
0.1329	1838	0.1329	---
0.133	1813	0.133	---
0.1331	1834	0.1331	---
0.1332	1778	0.1332	---
0.1333	1722	0.1333	---
0.1334	1854	0.1334	---
0.1335	1803	0.1335	---
0.1336	1732	0.1336	---
0.1337	1694	0.1337	---
0.1338	1771	0.1338	---
0.1339	1740	0.1339	---
0.134	1778	0.134	---
0.1341	1695	0.1341	---
0.1342	1615	0.1342	---
0.1343	1638	0.1343	---
0.1344	1643	0.1344	---
0.1345	1674	0.1345	---
0.1346	1698	0.1346	---
0.1347	1657	0.1347	---
0.1348	1599	0.1348	---
0.1349	1688	0.1349	---
0.135	1614	0.135	---
0.1351	1634	0.1351	---
0.1352	1636	0.1352	---
0.1353	1622	0.1353	---
0.1354	1569	0.1354	---
0.1355	1583	0.1355	---
0.1356	1626	0.1356	---
0.1357	1687	0.1357	---
0.1358	1598	0.1358	---
0.1359	1659	0.1359	---
0.136	1629	0.136	---
0.1361	1586	0.1361	---
0.1362	1541	0.1362	---
0.1363	1512	0.1363	---
0.1364	1563	0.1364	---
0.1365	1552	0.1365	---
0.1366	1545	0.1366	---
0.1367	1522	0.1367	---
0.1368	1507	0.1368	---
0.1369	1580	0.1369	---
0.137	1529	0.137	---
0.1371	1499	0.1371	---
0.1372	1550	0.1372	---
0.1373	1541	0.1373	---
0.1374	1463	0.1374	---
0.1375	1476	0.1375	---
0.1376	1465	0.1376	---
0.1377	1441	0.1377	---
0.1378	1494	0.1378	---
0.1379	1496	0.1379	---
0.138	1500	0.138	---
0.1381	1438	0.1381	---
0.1382	1459	0.1382	---
0.1383	1484	0.1383	---
0.1384	1447	0.1384	---
0.1385	1345	0.1385	---
0.1386	1411	0.1386	---
0.1387	1438	0.1387	---
0.1388	1405	0.1388	---
0.1389	1474	0.1389	---
0.139	1427	0.139	---
0.1391	1460	0.1391	---
0.1392	1351	0.1392	---
0.1393	1424	0.1393	---
0.1394	1403	0.1394	---
0.1395	1356	0.1395	---
0.1396	1405	0.1396	---
0.1397	1391	0.1397	---
0.1398	1455	0.1398	---
0.1399	1395	0.1399	---
0.14	1365	0.14	---
0.1401	1350	0.1401	---
0.1402	1388	0.1402	---
0.1403	1342	0.1403	---
0.1404	1314	0.1404	---
0.1405	1344	0.1405	---
0.1406	1352	0.1406	---
0.1407	1312	0.1407	---
0.1408	1359	0.1408	---
0.1409	1360	0.1409	---
0.141	1315	0.141	---
0.1411	1293	0.1411	---
0.1412	1337	0.1412	---
0.1413	1329	0.1413	---
0.1414	1276	0.1414	---
0.1415	1332	0.1415	---
0.1416	1311	0.1416	---
0.1417	1307	0.1417	---
0.1418	1247	0.1418	---
0.1419	1342	0.1419	---
0.142	1295	0.142	---
0.1421	1232	0.1421	---
0.1422	1284	0.1422	---
0.1423	1224	0.1423	---
0.1424	1290	0.1424	---
0.1425	1308	0.1425	---
0.1426	1304	0.1426	---
0.1427	1255	0.1427	---
0.1428	1252	0.1428	---
0.1429	1227	0.1429	---
0.143	1254	0.143	---
0.1431	1280	0.1431	---
0.1432	1276	0.1432	---
0.1433	1162	0.1433	---
0.1434	1192	0.1434	---
0.1435	1251	0.1435	---
0.1436	1176	0.1436	---
0.1437	1189	0.1437	---
0.1438	1214	0.1438	---
0.1439	1187	0.1439	---
0.144	1251	0.144	---
0.1441	1169	0.1441	---
0.1442	1173	0.1442	---
0.1443	1212	0.1443	---
0.1444	1185	0.1444	---
0.1445	1201	0.1445	---
0.1446	1184	0.1446	---
0.1447	1185	0.1447	---
0.1448	1161	0.1448	---
0.1449	1117	0.1449	---
0.145	1152	0.145	---
0.1451	1099	0.1451	---
0.1452	1150	0.1452	---
0.1453	1149	0.1453	---
0.1454	1169	0.1454	---
0.1455	1135	0.1455	---
0.1456	1161	0.1456	---
0.1457	1097	0.1457	---
0.1458	1157	0.1458	---
0.1459	1146	0.1459	---
0.146	1182	0.146	---
0.1461	1194	0.1461	---
0.1462	1121	0.1462	---
0.1463	1120	0.1463	---
0.1464	1142	0.1464	---
0.1465	1121	0.1465	---
0.1466	1153	0.1466	---
0.1467	1168	0.1467	---
0.1468	1123	0.1468	---
0.1469	1085	0.1469	---
0.147	1093	0.147	---
0.1471	1126	0.1471	---
0.1472	1113	0.1472	---
0.1473	1075	0.1473	---
0.1474	1110	0.1474	---
0.1475	1072	0.1475	---
0.1476	1096	0.1476	---
0.1477	1099	0.1477	---
0.1478	1064	0.1478	---
0.1479	1056	0.1479	---
0.148	1076	0.148	---
0.1481	1177	0.1481	---
0.1482	1074	0.1482	---
0.1483	1037	0.1483	---
0.1484	1052	0.1484	---
0.1485	1011	0.1485	---
0.1486	1025	0.1486	---
0.1487	1107	0.1487	---
0.1488	1046	0.1488	---
0.1489	995	0.1489	---
0.149	1026	0.149	---
0.1491	1053	0.1491	---
0.1492	1025	0.1492	---
0.1493	1074	0.1493	---
0.1494	1009	0.1494	---
0.1495	1048	0.1495	---
0.1496	1053	0.1496	---
0.1497	1083	0.1497	---
0.1498	1096	0.1498	---
0.1499	1012	0.1499	---
0.15	1011	0.15	---
0.1501	975	0.1501	---
0.1502	988	0.1502	---
0.1503	1049	0.1503	---
0.1504	1030	0.1504	---
0.1505	1027	0.1505	---
0.1506	966	0.1506	---
0.1507	981	0.1507	---
0.1508	1000	0.1508	---
0.1509	1005	0.1509	---
0.151	952	0.151	---
0.1511	1008	0.1511	---
0.1512	962	0.1512	---
0.1513	1011	0.1513	---
0.1514	999	0.1514	---
0.1515	975	0.1515	---
0.1516	984	0.1516	---
0.1517	997	0.1517	---
0.1518	918	0.1518	---
0.1519	973	0.1519	---
0.152	921	0.152	---
0.1521	1009	0.1521	---
0.1522	973	0.1522	---
0.1523	987	0.1523	---
0.1524	954	0.1524	---
0.1525	953	0.1525	---
0.1526	901	0.1526	---
0.1527	958	0.1527	---
0.1528	897	0.1528	---
0.1529	941	0.1529	---
0.153	897	0.153	---
0.1531	961	0.1531	---
0.1532	999	0.1532	---
0.1533	1007	0.1533	---
0.1534	977	0.1534	---
0.1535	950	0.1535	---
0.1536	987	0.1536	---
0.1537	977	0.1537	---
0.1538	1032	0.1538	---
0.1539	1008	0.1539	---
0.154	940	0.154	---
0.1541	965	0.1541	---
0.1542	950	0.1542	---
0.1543	994	0.1543	---
0.1544	941	0.1544	---
0.1545	940	0.1545	---
0.1546	939	0.1546	---
0.1547	925	0.1547	---
0.1548	922	0.1548	---
0.1549	934	0.1549	---
0.155	1011	0.155	---
0.1551	1005	0.1551	---
0.1552	1019	0.1552	---
0.1553	1037	0.1553	---
0.1554	1099	0.1554	---
0.1555	972	0.1555	---
0.1556	1044	0.1556	---
0.1557	995	0.1557	---
0.1558	950	0.1558	---
0.1559	947	0.1559	---
0.156	958	0.156	---
0.1561	951	0.1561	---
0.1562	1030	0.1562	---
0.1563	1293	0.1563	---
0.1564	1898	0.1564	---
0.1565	2311	0.1565	---
0.1566	2289	0.1566	---
0.1567	2253	0.1567	---
0.1568	2079	0.1568	---
0.1569	2098	0.1569	---
0.157	2050	0.157	---
0.1571	1981	0.1571	---
0.1572	1992	0.1572	---
0.1573	1902	0.1573	---
0.1574	1914	0.1574	---
0.1575	1904	0.1575	---
0.1576	1890	0.1576	---
0.1577	1892	0.1577	---
0.1578	1862	0.1578	---
0.1579	1899	0.1579	---
0.158	1878	0.158	---
0.1581	1858	0.1581	---
0.1582	1900	0.1582	---
0.1583	1844	0.1583	---
0.1584	1867	0.1584	---
0.1585	1768	0.1585	---
0.1586	1789	0.1586	---
0.1587	1792	0.1587	---
0.1588	1833	0.1588	---
0.1589	1811	0.1589	---
0.159	1781	0.159	---
0.1591	1752	0.1591	---
0.1592	1764	0.1592	---
0.1593	1716	0.1593	---
0.1594	1742	0.1594	---
0.1595	1722	0.1595	---
0.1596	1745	0.1596	---
0.1597	1680	0.1597	---
0.1598	1752	0.1598	---
0.1599	1609	0.1599	---
0.16	1690	0.16	---
0.1601	1709	0.1601	---
0.1602	1690	0.1602	---
0.1603	1669	0.1603	---
0.1604	1691	0.1604	---
0.1605	1690	0.1605	---
0.1606	1649	0.1606	---
0.1607	1667	0.1607	---
0.1608	1655	0.1608	---
0.1609	1666	0.1609	---
0.161	1585	0.161	---
0.1611	1681	0.1611	---
0.1612	1678	0.1612	---
0.1613	1591	0.1613	---
0.1614	1599	0.1614	---
0.1615	1560	0.1615	---
0.1616	1586	0.1616	---
0.1617	1544	0.1617	---
0.1618	1619	0.1618	---
0.1619	1615	0.1619	---
0.162	1549	0.162	---
0.1621	1510	0.1621	---
0.1622	1548	0.1622	---
0.1623	1530	0.1623	---
0.1624	1520	0.1624	---
0.1625	1551	0.1625	---
0.1626	1539	0.1626	---
0.1627	1550	0.1627	---
0.1628	1511	0.1628	---
0.1629	1527	0.1629	---
0.163	1529	0.163	---
0.1631	1511	0.1631	---
0.1632	1535	0.1632	---
0.1633	1465	0.1633	---
0.1634	1547	0.1634	---
0.1635	1507	0.1635	---
0.1636	1471	0.1636	---
0.1637	1524	0.1637	---
0.1638	1498	0.1638	---
0.1639	1500	0.1639	---
0.164	1515	0.164	---
0.1641	1481	0.1641	---
0.1642	1517	0.1642	---
0.1643	1418	0.1643	---
0.1644	1425	0.1644	---
0.1645	1520	0.1645	---
0.1646	1399	0.1646	---
0.1647	1418	0.1647	---
0.1648	1448	0.1648	---
0.1649	1396	0.1649	---
0.165	1457	0.165	---
0.1651	1414	0.1651	---
0.1652	1438	0.1652	---
0.1653	1366	0.1653	---
0.1654	1302	0.1654	---
0.1655	1384	0.1655	---
0.1656	1412	0.1656	---
0.1657	1355	0.1657	---
0.1658	1382	0.1658	---
0.1659	1333	0.1659	---
0.166	1381	0.166	---
0.1661	1321	0.1661	---
0.1662	1467	0.1662	---
0.1663	1383	0.1663	---
0.1664	1344	0.1664	---
0.1665	1356	0.1665	---
0.1666	1359	0.1666	---
0.1667	1336	0.1667	---
0.1668	1393	0.1668	---
0.1669	1349	0.1669	---
0.167	1380	0.167	---
0.1671	1349	0.1671	---
0.1672	1307	0.1672	---
0.1673	1373	0.1673	---
0.1674	1317	0.1674	---
0.1675	1345	0.1675	---
0.1676	1385	0.1676	---
0.1677	1341	0.1677	---
0.1678	1311	0.1678	---
0.1679	1291	0.1679	---
0.168	1281	0.168	---
0.1681	1297	0.1681	---
0.1682	1244	0.1682	---
0.1683	1228	0.1683	---
0.1684	1251	0.1684	---
0.1685	1241	0.1685	---
0.1686	1287	0.1686	---
0.1687	1273	0.1687	---
0.1688	1219	0.1688	---
0.1689	1334	0.1689	---
0.169	1174	0.169	---
0.1691	1269	0.1691	---
0.1692	1214	0.1692	---
0.1693	1192	0.1693	---
0.1694	1242	0.1694	---
0.1695	1186	0.1695	---
0.1696	1217	0.1696	---
0.1697	1286	0.1697	---
0.1698	1231	0.1698	---
0.1699	1243	0.1699	---
0.17	1210	0.17	---
0.1701	1132	0.1701	---
0.1702	1235	0.1702	---
0.1703	1247	0.1703	---
0.1704	1254	0.1704	---
0.1705	1223	0.1705	---
0.1706	1192	0.1706	---
0.1707	1195	0.1707	---
0.1708	1253	0.1708	---
0.1709	1175	0.1709	---
0.171	1231	0.171	---
0.1711	1150	0.1711	---
0.1712	1215	0.1712	---
0.1713	1201	0.1713	---
0.1714	1161	0.1714	---
0.1715	1133	0.1715	---
0.1716	1136	0.1716	---
0.1717	1131	0.1717	---
0.1718	1094	0.1718	---
0.1719	1144	0.1719	---
0.172	1170	0.172	---
0.1721	1113	0.1721	---
0.1722	1094	0.1722	---
0.1723	1116	0.1723	---
0.1724	1089	0.1724	---
0.1725	1103	0.1725	---
0.1726	1096	0.1726	---
0.1727	1108	0.1727	---
0.1728	1138	0.1728	---
0.1729	1146	0.1729	---
0.173	1088	0.173	---
0.1731	1127	0.1731	---
0.1732	1134	0.1732	---
0.1733	1096	0.1733	---
0.1734	1090	0.1734	---
0.1735	1031	0.1735	---
0.1736	1072	0.1736	---
0.1737	1111	0.1737	---
0.1738	1057	0.1738	---
0.1739	1100	0.1739	---
0.174	1085	0.174	---
0.1741	1093	0.1741	---
0.1742	1082	0.1742	---
0.1743	1079	0.1743	---
0.1744	1027	0.1744	---
0.1745	1090	0.1745	---
0.1746	1033	0.1746	---
0.1747	1078	0.1747	---
0.1748	1019	0.1748	---
0.1749	1032	0.1749	---
0.175	1019	0.175	---
0.1751	1054	0.1751	---
0.1752	1070	0.1752	---
0.1753	1025	0.1753	---
0.1754	1024	0.1754	---
0.1755	1052	0.1755	---
0.1756	1030	0.1756	---
0.1757	1098	0.1757	---
0.1758	1072	0.1758	---
0.1759	999	0.1759	---
0.176	1015	0.176	---
0.1761	1002	0.1761	---
0.1762	1008	0.1762	---
0.1763	1004	0.1763	---
0.1764	978	0.1764	---
0.1765	1018	0.1765	---
0.1766	981	0.1766	---
0.1767	1007	0.1767	---
0.1768	990	0.1768	---
0.1769	998	0.1769	---
0.177	969	0.177	---
0.1771	979	0.1771	---
0.1772	981	0.1772	---
0.1773	959	0.1773	---
0.1774	976	0.1774	---
0.1775	1013	0.1775	---
0.1776	972	0.1776	---
0.1777	960	0.1777	---
0.1778	916	0.1778	---
0.1779	1007	0.1779	---
0.178	979	0.178	---
0.1781	951	0.1781	---
0.1782	1005	0.1782	---
0.1783	1032	0.1783	---
0.1784	1044	0.1784	---
0.1785	1037	0.1785	---
0.1786	1013	0.1786	---
0.1787	1046	0.1787	---
0.1788	974	0.1788	---
0.1789	1039	0.1789	---
0.179	1039	0.179	---
0.1791	1042	0.1791	---
0.1792	987	0.1792	---
0.1793	972	0.1793	---
0.1794	1023	0.1794	---
0.1795	962	0.1795	---
0.1796	950	0.1796	---
0.1797	979	0.1797	---
0.1798	969	0.1798	---
0.1799	995	0.1799	---
0.18	1040	0.18	---
0.1801	1025	0.1801	---
0.1802	1057	0.1802	---
0.1803	1065	0.1803	---
0.1804	1024	0.1804	---
0.1805	1028	0.1805	---
0.1806	1086	0.1806	---
0.1807	1029	0.1807	---
0.1808	1046	0.1808	---
0.1809	978	0.1809	---
0.181	958	0.181	---
0.1811	995	0.1811	---
0.1812	1001	0.1812	---
0.1813	1307	0.1813	---
0.1814	1960	0.1814	---
0.1815	2306	0.1815	---
0.1816	2287	0.1816	---
0.1817	2139	0.1817	---
0.1818	2188	0.1818	---
0.1819	2075	0.1819	---
0.182	2046	0.182	---
0.1821	1991	0.1821	---
0.1822	2059	0.1822	---
0.1823	1993	0.1823	---
0.1824	1925	0.1824	---
0.1825	1976	0.1825	---
0.1826	1988	0.1826	---
0.1827	2014	0.1827	---
0.1828	1870	0.1828	---
0.1829	1942	0.1829	---
0.183	1897	0.183	---
0.1831	1927	0.1831	---
0.1832	1884	0.1832	---
0.1833	1838	0.1833	---
0.1834	1871	0.1834	---
0.1835	1814	0.1835	---
0.1836	1865	0.1836	---
0.1837	1836	0.1837	---
0.1838	1800	0.1838	---
0.1839	1767	0.1839	---
0.184	1893	0.184	---
0.1841	1817	0.1841	---
0.1842	1821	0.1842	---
0.1843	1862	0.1843	---
0.1844	1797	0.1844	---
0.1845	1776	0.1845	---
0.1846	1741	0.1846	---
0.1847	1719	0.1847	---
0.1848	1729	0.1848	---
0.1849	1743	0.1849	---
0.185	1830	0.185	---
0.1851	1739	0.1851	---
0.1852	1712	0.1852	---
0.1853	1709	0.1853	---
0.1854	1699	0.1854	---
0.1855	1673	0.1855	---
0.1856	1732	0.1856	---
0.1857	1648	0.1857	---
0.1858	1668	0.1858	---
0.1859	1698	0.1859	---
0.186	1656	0.186	---
0.1861	1676	0.1861	---
0.1862	1657	0.1862	---
0.1863	1644	0.1863	---
0.1864	1659	0.1864	---
0.1865	1647	0.1865	---
0.1866	1602	0.1866	---
0.1867	1621	0.1867	---
0.1868	1631	0.1868	---
0.1869	1566	0.1869	---
0.187	1620	0.187	---
0.1871	1546	0.1871	---
0.1872	1560	0.1872	---
0.1873	1625	0.1873	---
0.1874	1563	0.1874	---
0.1875	1539	0.1875	---
0.1876	1548	0.1876	---
0.1877	1677	0.1877	---
0.1878	1632	0.1878	---
0.1879	1598	0.1879	---
0.188	1489	0.188	---
0.1881	1573	0.1881	---
0.1882	1520	0.1882	---
0.1883	1584	0.1883	---
0.1884	1569	0.1884	---
0.1885	1530	0.1885	---
0.1886	1515	0.1886	---
0.1887	1617	0.1887	---
0.1888	1511	0.1888	---
0.1889	1522	0.1889	---
0.189	1507	0.189	---
0.1891	1531	0.1891	---
0.1892	1505	0.1892	---
0.1893	1492	0.1893	---
0.1894	1471	0.1894	---
0.1895	1505	0.1895	---
0.1896	1503	0.1896	---
0.1897	1458	0.1897	---
0.1898	1429	0.1898	---
0.1899	1467	0.1899	---
0.19	1471	0.19	---
0.1901	1450	0.1901	---
0.1902	1490	0.1902	---
0.1903	1465	0.1903	---
0.1904	1320	0.1904	---
0.1905	1392	0.1905	---
0.1906	1429	0.1906	---
0.1907	1405	0.1907	---
0.1908	1481	0.1908	---
0.1909	1406	0.1909	---
0.191	1336	0.191	---
0.1911	1397	0.1911	---
0.1912	1373	0.1912	---
0.1913	1393	0.1913	---
0.1914	1369	0.1914	---
0.1915	1442	0.1915	---
0.1916	1380	0.1916	---
0.1917	1344	0.1917	---
0.1918	1396	0.1918	---
0.1919	1344	0.1919	---
0.192	1357	0.192	---
0.1921	1314	0.1921	---
0.1922	1313	0.1922	---
0.1923	1280	0.1923	---
0.1924	1351	0.1924	---
0.1925	1328	0.1925	---
0.1926	1295	0.1926	---
0.1927	1338	0.1927	---
0.1928	1359	0.1928	---
0.1929	1389	0.1929	---
0.193	1344	0.193	---
0.1931	1299	0.1931	---
0.1932	1290	0.1932	---
0.1933	1365	0.1933	---
0.1934	1365	0.1934	---
0.1935	1345	0.1935	---
0.1936	1268	0.1936	---
0.1937	1270	0.1937	---
0.1938	1324	0.1938	---
0.1939	1269	0.1939	---
0.194	1336	0.194	---
0.1941	1207	0.1941	---
0.1942	1309	0.1942	---
0.1943	1322	0.1943	---
0.1944	1297	0.1944	---
0.1945	1260	0.1945	---
0.1946	1268	0.1946	---
0.1947	1308	0.1947	---
0.1948	1204	0.1948	---
0.1949	1255	0.1949	---
0.195	1196	0.195	---
0.1951	1275	0.1951	---
0.1952	1185	0.1952	---
0.1953	1258	0.1953	---
0.1954	1238	0.1954	---
0.1955	1189	0.1955	---
0.1956	1222	0.1956	---
0.1957	1237	0.1957	---
0.1958	1230	0.1958	---
0.1959	1226	0.1959	---
0.196	1214	0.196	---
0.1961	1249	0.1961	---
0.1962	1158	0.1962	---
0.1963	1184	0.1963	---
0.1964	1147	0.1964	---
0.1965	1244	0.1965	---
0.1966	1241	0.1966	---
0.1967	1210	0.1967	---
0.1968	1178	0.1968	---
0.1969	1175	0.1969	---
0.197	1220	0.197	---
0.1971	1196	0.1971	---
0.1972	1176	0.1972	---
0.1973	1210	0.1973	---
0.1974	1179	0.1974	---
0.1975	1087	0.1975	---
0.1976	1182	0.1976	---
0.1977	1166	0.1977	---
0.1978	1157	0.1978	---
0.1979	1088	0.1979	---
0.198	1099	0.198	---
0.1981	1172	0.1981	---
0.1982	1135	0.1982	---
0.1983	1164	0.1983	---
0.1984	1118	0.1984	---
0.1985	1117	0.1985	---
0.1986	1125	0.1986	---
0.1987	1096	0.1987	---
0.1988	1119	0.1988	---
0.1989	1107	0.1989	---
0.199	1063	0.199	---
0.1991	1050	0.1991	---
0.1992	1122	0.1992	---
0.1993	1102	0.1993	---
0.1994	1041	0.1994	---
0.1995	1101	0.1995	---
0.1996	1074	0.1996	---
0.1997	1074	0.1997	---
0.1998	1054	0.1998	---
[truncated: 27,026 more rows]

## Sheet: Fig4
Distance / nm	tau_Av_Int[ns]	tau_Av_Amp[ns]	Ratio-Int	Ratio-Amp	10% of Ratio-Amp		distance	CPS-(535nm)	CPS-(535nm)	CPS-(535nm)
1.5	78	42	0.063	0.0429	0.00532		nm	QY=75%	QY=75%	QY=75%
2.3	95	46	0.07674	0.04699	0.00512			isotropic	p orientation	s orientation
5	305	234	0.24637	0.23902	0.02589		0.1	5.862e-06	3.908e-06	7.817e-06
7.8	426.6	348.97	0.34459	0.35646	0.03861		0.5	0.0007311	0.0004875	0.0009748
10	631.3	563.87	0.50994	0.57597	0.06238		0.9	0.00422	0.00282	0.00562
14	988	786	0.79806	0.80286	0.08696		1.3	0.012	0.00831	0.017
18	1149.1	834	0.92819	0.85189	0.09227		1.7	0.027	0.018	0.035
29	1000	850	0.80775	0.86823	0.09028		2.1	0.047	0.032	0.063
50	1274.44	977.09	1.02943	0.99805	0.1081		2.5	0.074	0.05	0.097
60	1149.6	952.5	0.92859	0.97293	0.10538		2.9	0.105	0.071	0.137
75	1089	877	0.87964	0.89581	0.09518		3.3	0.137	0.094	0.179
103	1137	964.3	0.91842	0.98498	0.10222		3.7	0.171	0.117	0.221
170	1325.7	1064	1.07084	1.08682	0.11063		4.1	0.203	0.14	0.262
230	1393	1054.6	1.1252	1.07722	0.11667		4.5	0.233	0.161	0.3
glass	1238	979	1	1	0.1		4.9	0.261	0.181	0.335
							5.3	0.286	0.199	0.367
							5.7	0.309	0.215	0.395
							6.1	0.33	0.23	0.421
							6.5	0.348	0.243	0.444
							6.9	0.365	0.255	0.465
							7.3	0.38	0.266	0.485
							7.7	0.394	0.276	0.503
							8.1	0.407	0.285	0.519
							8.5	0.419	0.293	0.534
							8.9	0.43	0.301	0.549
							9.3	0.441	0.308	0.562
							9.7	0.451	0.315	0.575
							10.1	0.46	0.321	0.587
							10.5	0.469	0.327	0.599
							10.9	0.478	0.333	0.611
							11.3	0.486	0.339	0.622
							11.7	0.494	0.344	0.632
							12.1	0.502	0.349	0.643
							12.5	0.51	0.355	0.653
							12.9	0.517	0.359	0.663
							13.3	0.524	0.364	0.672
							13.7	0.532	0.369	0.682
							14.1	0.538	0.374	0.691
							14.5	0.545	0.378	0.7
							14.9	0.552	0.383	0.709
							15.3	0.559	0.387	0.718
							15.7	0.565	0.391	0.726
							16.1	0.571	0.396	0.735
							16.5	0.578	0.4	0.743
							16.9	0.584	0.404	0.752
							17.3	0.59	0.408	0.76
							17.7	0.596	0.412	0.768
							18.1	0.602	0.416	0.776
							18.5	0.608	0.42	0.784
							18.9	0.614	0.424	0.791
							19.3	0.62	0.428	0.799
							19.7	0.626	0.432	0.807
							20.1	0.631	0.436	0.814
							20.5	0.637	0.44	0.821
							20.9	0.642	0.443	0.828
							21.3	0.648	0.447	0.836
							21.7	0.653	0.451	0.842
							22.1	0.659	0.455	0.849
							22.5	0.664	0.459	0.856
							22.9	0.669	0.462	0.863
							23.3	0.675	0.466	0.869
							23.7	0.68	0.47	0.876
							24.1	0.685	0.473	0.882
							24.5	0.69	0.477	0.888
							24.9	0.695	0.48	0.894
							25.3	0.7	0.484	0.9
							25.7	0.705	0.488	0.906
							26.1	0.709	0.491	0.912
							26.5	0.714	0.495	0.918
							26.9	0.719	0.498	0.923
							27.3	0.724	0.502	0.929
							27.7	0.728	0.505	0.934
							28.1	0.733	0.509	0.939
							28.5	0.737	0.512	0.944
							28.9	0.741	0.516	0.949
							29.3	0.746	0.519	0.954
							29.7	0.75	0.523	0.959
							30.1	0.754	0.526	0.964
							30.5	0.758	0.529	0.968
							30.9	0.763	0.533	0.972
							31.3	0.767	0.536	0.977
							31.7	0.771	0.539	0.981
							32.1	0.775	0.543	0.985
							32.5	0.778	0.546	0.989
							32.9	0.782	0.549	0.993
							33.3	0.786	0.553	0.996
							33.7	0.79	0.556	1
							34.1	0.793	0.559	1.004
							34.5	0.797	0.562	1.007
							34.9	0.8	0.565	1.01
							35.3	0.804	0.569	1.013
							35.7	0.807	0.572	1.016
							36.1	0.811	0.575	1.019
							36.5	0.814	0.578	1.022
							36.9	0.817	0.581	1.025
							37.3	0.82	0.584	1.028
							37.7	0.823	0.588	1.03
							38.1	0.826	0.591	1.032
							38.5	0.829	0.594	1.035
							38.9	0.832	0.597	1.037
							39.3	0.835	0.6	1.039
							39.7	0.838	0.603	1.041
							40.1	0.841	0.606	1.043
							40.5	0.844	0.609	1.045
							40.9	0.846	0.612	1.047
							41.3	0.849	0.615	1.048
							41.7	0.851	0.618	1.05
							42.1	0.854	0.621	1.051
							42.5	0.856	0.624	1.053
							42.9	0.859	0.627	1.054
							43.3	0.861	0.63	1.055
							43.7	0.864	0.633	1.056
							44.1	0.866	0.636	1.057
							44.5	0.868	0.639	1.058
							44.9	0.87	0.641	1.059
							45.3	0.872	0.644	1.06
							45.7	0.874	0.647	1.06
							46.1	0.876	0.65	1.061
							46.5	0.878	0.653	1.062
							46.9	0.88	0.656	1.062
							47.3	0.882	0.658	1.063
							47.7	0.884	0.661	1.063
							48.1	0.886	0.664	1.063
							48.5	0.887	0.667	1.063
							48.9	0.889	0.67	1.063
							49.3	0.891	0.672	1.064
							49.7	0.892	0.675	1.064
							50.1	0.894	0.678	1.064
							50.5	0.895	0.68	1.063
							50.9	0.897	0.683	1.063
							51.3	0.898	0.686	1.063
							51.7	0.9	0.689	1.063
							52.1	0.901	0.691	1.062
							52.5	0.902	0.694	1.062
							52.9	0.904	0.696	1.062
							53.3	0.905	0.699	1.061
							53.7	0.906	0.702	1.061
							54.1	0.907	0.704	1.06
							54.5	0.908	0.707	1.059
							54.9	0.91	0.71	1.059
							55.3	0.911	0.712	1.058
							55.7	0.912	0.715	1.057
							56.1	0.913	0.717	1.056
							56.5	0.914	0.72	1.056
							56.9	0.914	0.722	1.055
							57.3	0.915	0.725	1.054
							57.7	0.916	0.727	1.052
							58.1	0.917	0.73	1.051
							58.5	0.918	0.732	1.05
							58.9	0.918	0.735	1.049
							59.3	0.919	0.737	1.048
							59.7	0.92	0.74	1.048
							60.1	0.921	0.742	1.047
							60.5	0.921	0.745	1.045
							60.9	0.922	0.747	1.044
							61.3	0.923	0.75	1.043
							61.7	0.923	0.752	1.042
							62.1	0.924	0.754	1.041
							62.5	0.924	0.757	1.039
							62.9	0.925	0.759	1.038
							63.3	0.925	0.762	1.037
							63.7	0.926	0.764	1.036
							64.1	0.926	0.766	1.034
							64.5	0.927	0.769	1.033
							64.9	0.927	0.771	1.031
							65.3	0.927	0.773	1.03
							65.7	0.928	0.776	1.029
							66.1	0.928	0.778	1.027
							66.5	0.928	0.78	1.026
							66.9	0.929	0.783	1.024
							67.3	0.929	0.785	1.023
							67.7	0.929	0.787	1.022
							68.1	0.93	0.789	1.02
							68.5	0.93	0.792	1.019
							68.9	0.93	0.794	1.017
							69.3	0.93	0.796	1.016
							69.7	0.93	0.798	1.014
							70.1	0.931	0.801	1.013
							70.5	0.931	0.803	1.011
							70.9	0.931	0.805	1.01
							71.3	0.931	0.807	1.008
							71.7	0.931	0.809	1.007
							72.1	0.931	0.812	1.005
							72.5	0.931	0.814	1.004
							72.9	0.931	0.816	1.002
							73.3	0.931	0.818	1.001
							73.7	0.931	0.82	0.999
							74.1	0.932	0.822	0.998
							74.5	0.932	0.824	0.996
							74.9	0.932	0.827	0.995
							75.3	0.932	0.829	0.993
							75.7	0.932	0.831	0.992
							76.1	0.932	0.833	0.99
							76.5	0.932	0.835	0.989
							76.9	0.932	0.837	0.987
							77.3	0.932	0.839	0.986
							77.7	0.931	0.841	0.984
							78.1	0.931	0.843	0.983
							78.5	0.931	0.845	0.982
							78.9	0.931	0.847	0.98
							79.3	0.931	0.849	0.979
							79.7	0.931	0.851	0.977
							80.1	0.931	0.853	0.976
							80.5	0.931	0.855	0.974
							80.9	0.931	0.857	0.973
							81.3	0.931	0.859	0.971
							81.7	0.931	0.861	0.97
							82.1	0.931	0.863	0.969
							82.5	0.931	0.865	0.967
							82.9	0.93	0.867	0.966
							83.3	0.93	0.869	0.965
							83.7	0.93	0.871	0.963
							84.1	0.93	0.873	0.962
							84.5	0.93	0.874	0.961
							84.9	0.93	0.876	0.959
							85.3	0.93	0.878	0.958
							85.7	0.93	0.88	0.957
							86.1	0.93	0.882	0.955
							86.5	0.929	0.884	0.954
							86.9	0.929	0.886	0.953
							87.3	0.929	0.887	0.952
							87.7	0.929	0.889	0.95
							88.1	0.929	0.891	0.949
							88.5	0.929	0.893	0.948
							88.9	0.929	0.895	0.947
							89.3	0.929	0.896	0.946
							89.7	0.928	0.898	0.944
							90.1	0.928	0.9	0.943
							90.5	0.928	0.902	0.942
							90.9	0.928	0.903	0.941
							91.3	0.928	0.905	0.94
							91.7	0.928	0.907	0.939
							92.1	0.928	0.908	0.938
							92.5	0.928	0.91	0.937
							92.9	0.927	0.912	0.936
							93.3	0.927	0.913	0.934
							93.7	0.927	0.915	0.933
							94.1	0.927	0.917	0.932
							94.5	0.927	0.918	0.931
							94.9	0.927	0.92	0.93
							95.3	0.927	0.922	0.929
							95.7	0.927	0.923	0.929
							96.1	0.927	0.925	0.928
							96.5	0.927	0.926	0.927
							96.9	0.926	0.928	0.926
							97.3	0.926	0.93	0.925
							97.7	0.926	0.931	0.924
							98.1	0.926	0.933	0.923
							98.5	0.926	0.934	0.922
							98.9	0.926	0.936	0.921
							99.3	0.926	0.937	0.921
							99.7	0.926	0.939	0.92
							100.1	0.926	0.94	0.919
							100.5	0.926	0.942	0.918
							100.9	0.926	0.943	0.917
							101.3	0.926	0.945	0.917
							101.7	0.926	0.946	0.916
							102.1	0.926	0.948	0.915
							102.5	0.926	0.949	0.915
							102.9	0.926	0.95	0.914
							103.3	0.926	0.952	0.913
							103.7	0.926	0.953	0.913
							104.1	0.926	0.955	0.912
							104.5	0.926	0.956	0.911
							104.9	0.926	0.957	0.911
							105.3	0.926	0.959	0.91
							105.7	0.926	0.96	0.91
							106.1	0.926	0.961	0.909
							106.5	0.926	0.963	0.909
							106.9	0.926	0.964	0.908
							107.3	0.926	0.965	0.908
							107.7	0.926	0.966	0.907
							108.1	0.926	0.968	0.907
							108.5	0.926	0.969	0.906
							108.9	0.926	0.97	0.906
							109.3	0.926	0.971	0.905
							109.7	0.926	0.973	0.905
							110.1	0.926	0.974	0.904
							110.5	0.927	0.975	0.904
							110.9	0.927	0.976	0.904
							111.3	0.927	0.977	0.903
							111.7	0.927	0.979	0.903
							112.1	0.927	0.98	0.903
							112.5	0.927	0.981	0.902
							112.9	0.927	0.982	0.902
							113.3	0.927	0.983	0.902
							113.7	0.928	0.984	0.902
							114.1	0.928	0.985	0.901
							114.5	0.928	0.986	0.901
							114.9	0.928	0.987	0.901
							115.3	0.928	0.989	0.901
							115.7	0.928	0.99	0.901
							116.1	0.929	0.991	0.901
							116.5	0.929	0.992	0.9
							116.9	0.929	0.993	0.9
							117.3	0.929	0.994	0.9
							117.7	0.93	0.995	0.9
							118.1	0.93	0.996	0.9
							118.5	0.93	0.997	0.9
							118.9	0.93	0.998	0.9
							119.3	0.93	0.998	0.9
							119.7	0.931	0.999	0.9
							120.1	0.931	1	0.9
							120.5	0.931	1.001	0.9
							120.9	0.932	1.002	0.9
							121.3	0.932	1.003	0.9
							121.7	0.932	1.004	0.9
							122.1	0.932	1.005	0.9
							122.5	0.933	1.006	0.9
							122.9	0.933	1.006	0.9
							123.3	0.933	1.007	0.9
							123.7	0.934	1.008	0.901
							124.1	0.934	1.009	0.901
							124.5	0.934	1.01	0.901
							124.9	0.935	1.01	0.901
							125.3	0.935	1.011	0.901
							125.7	0.935	1.012	0.901
							126.1	0.936	1.013	0.902
							126.5	0.936	1.013	0.902
							126.9	0.937	1.014	0.902
							127.3	0.937	1.015	0.902
							127.7	0.937	1.015	0.903
							128.1	0.938	1.016	0.903
							128.5	0.938	1.017	0.903
							128.9	0.939	1.017	0.904
							129.3	0.939	1.018	0.904
							129.7	0.939	1.019	0.904
							130.1	0.94	1.019	0.905
							130.5	0.94	1.02	0.905
							130.9	0.941	1.021	0.905
							131.3	0.941	1.021	0.906
							131.7	0.942	1.022	0.906
							132.1	0.942	1.022	0.907
							132.5	0.943	1.023	0.907
							132.9	0.943	1.023	0.908
							133.3	0.944	1.024	0.908
							133.7	0.944	1.025	0.908
							134.1	0.945	1.025	0.909
							134.5	0.945	1.026	0.909
							134.9	0.946	1.026	0.91
							135.3	0.946	1.027	0.911
							135.7	0.947	1.027	0.911
							136.1	0.947	1.027	0.912
							136.5	0.948	1.028	0.912
							136.9	0.948	1.028	0.913
							137.3	0.949	1.029	0.913
							137.7	0.949	1.029	0.914
							138.1	0.95	1.03	0.915
							138.5	0.95	1.03	0.915
							138.9	0.951	1.03	0.916
							139.3	0.952	1.031	0.916
							139.7	0.952	1.031	0.917
							140.1	0.953	1.031	0.918
							140.5	0.953	1.032	0.919
							140.9	0.954	1.032	0.919
							141.3	0.955	1.032	0.92
							141.7	0.955	1.033	0.921
							142.1	0.956	1.033	0.921
							142.5	0.956	1.033	0.922
							142.9	0.957	1.034	0.923
							143.3	0.958	1.034	0.924
							143.7	0.958	1.034	0.924
							144.1	0.959	1.034	0.925
							144.5	0.96	1.035	0.926
							144.9	0.96	1.035	0.927
							145.3	0.961	1.035	0.928
							145.7	0.962	1.035	0.928
							146.1	0.962	1.035	0.929
							146.5	0.963	1.036	0.93
							146.9	0.963	1.036	0.931
							147.3	0.964	1.036	0.932
							147.7	0.965	1.036	0.933
							148.1	0.965	1.036	0.934
							148.5	0.966	1.037	0.934
							148.9	0.967	1.037	0.935
							149.3	0.968	1.037	0.936
							149.7	0.968	1.037	0.937
							150.1	0.969	1.037	0.938
							150.5	0.97	1.037	0.939
							150.9	0.97	1.037	0.94
							151.3	0.971	1.037	0.941
							151.7	0.972	1.037	0.942
							152.1	0.972	1.037	0.943
							152.5	0.973	1.038	0.944
							152.9	0.974	1.038	0.945
							153.3	0.975	1.038	0.946
							153.7	0.975	1.038	0.947
							154.1	0.976	1.038	0.948
							154.5	0.977	1.038	0.949
							154.9	0.977	1.038	0.95
							155.3	0.978	1.038	0.951
							155.7	0.979	1.038	0.952
							156.1	0.98	1.038	0.953
							156.5	0.98	1.038	0.954
							156.9	0.981	1.038	0.955
							157.3	0.982	1.038	0.956
							157.7	0.982	1.038	0.957
							158.1	0.983	1.038	0.958
							158.5	0.984	1.038	0.959
							158.9	0.985	1.038	0.96
							159.3	0.985	1.037	0.961
							159.7	0.986	1.037	0.962
							160.1	0.987	1.037	0.963
							160.5	0.988	1.037	0.965
							160.9	0.988	1.037	0.966
							161.3	0.989	1.037	0.967
							161.7	0.99	1.037	0.968
							162.1	0.991	1.037	0.969
							162.5	0.991	1.037	0.97
							162.9	0.992	1.037	0.971
							163.3	0.993	1.036	0.972
							163.7	0.994	1.036	0.973
							164.1	0.994	1.036	0.975
							164.5	0.995	1.036	0.976
							164.9	0.996	1.036	0.977
							165.3	0.996	1.036	0.978
							165.7	0.997	1.036	0.979
							166.1	0.998	1.035	0.98
							166.5	0.999	1.035	0.981
							166.9	0.999	1.035	0.982
							167.3	1	1.035	0.984
							167.7	1.001	1.035	0.985
							168.1	1.002	1.035	0.986
							168.5	1.002	1.034	0.987
							168.9	1.003	1.034	0.988
							169.3	1.004	1.034	0.989
							169.7	1.004	1.034	0.99
							170.1	1.005	1.033	0.992
							170.5	1.006	1.033	0.993
							170.9	1.007	1.033	0.994
							171.3	1.007	1.033	0.995
							171.7	1.008	1.033	0.996
							172.1	1.009	1.032	0.997
							172.5	1.009	1.032	0.998
							172.9	1.01	1.032	0.999
							173.3	1.011	1.032	1.001
							173.7	1.011	1.031	1.002
							174.1	1.012	1.031	1.003
							174.5	1.013	1.031	1.004
							174.9	1.013	1.031	1.005
							175.3	1.014	1.03	1.006
							175.7	1.015	1.03	1.007
							176.1	1.015	1.03	1.008
							176.5	1.016	1.03	1.01
							176.9	1.017	1.029	1.011
							177.3	1.017	1.029	1.012
							177.7	1.018	1.029	1.013
							178.1	1.019	1.028	1.014
							178.5	1.019	1.028	1.015
							178.9	1.02	1.028	1.016
							179.3	1.021	1.028	1.017
							179.7	1.021	1.027	1.018
							180.1	1.022	1.027	1.019
							180.5	1.022	1.027	1.02
							180.9	1.023	1.026	1.021
							181.3	1.024	1.026	1.022
							181.7	1.024	1.026	1.023
							182.1	1.025	1.025	1.024
							182.5	1.025	1.025	1.025
							182.9	1.026	1.025	1.027
							183.3	1.027	1.024	1.028
							183.7	1.027	1.024	1.029
							184.1	1.028	1.024	1.03
							184.5	1.028	1.024	1.031
							184.9	1.029	1.023	1.032
							185.3	1.029	1.023	1.032
							185.7	1.03	1.023	1.033
							186.1	1.03	1.022	1.034
							186.5	1.031	1.022	1.035
							186.9	1.031	1.022	1.036
							187.3	1.032	1.021	1.037
							187.7	1.032	1.021	1.038
							188.1	1.033	1.021	1.039
							188.5	1.033	1.02	1.04
							188.9	1.034	1.02	1.041
							189.3	1.034	1.02	1.042
							189.7	1.035	1.019	1.043
							190.1	1.035	1.019	1.043
							190.5	1.036	1.019	1.044
							190.9	1.036	1.018	1.045
							191.3	1.036	1.018	1.046
							191.7	1.037	1.018	1.047
							192.1	1.037	1.017	1.048
							192.5	1.038	1.017	1.048
							192.9	1.038	1.017	1.049
							193.3	1.039	1.016	1.05
							193.7	1.039	1.016	1.051
							194.1	1.039	1.016	1.052
							194.5	1.04	1.015	1.052
							194.9	1.04	1.015	1.053
							195.3	1.04	1.015	1.054
							195.7	1.041	1.014	1.054
							196.1	1.041	1.014	1.055
							196.5	1.041	1.014	1.056
							196.9	1.042	1.013	1.056
							197.3	1.042	1.013	1.057
							197.7	1.042	1.013	1.058
							198.1	1.043	1.012	1.058
							198.5	1.043	1.012	1.059
							198.9	1.043	1.012	1.06
							199.3	1.043	1.011	1.06
							199.7	1.044	1.011	1.061
							200.1	1.044	1.011	1.061
							200.5	1.044	1.01	1.062
							200.9	1.044	1.01	1.062
							201.3	1.045	1.01	1.063
							201.7	1.045	1.009	1.063
							202.1	1.045	1.009	1.064
							202.5	1.045	1.009	1.064
							202.9	1.045	1.008	1.065
							203.3	1.045	1.008	1.065
							203.7	1.046	1.008	1.066
							204.1	1.046	1.007	1.066
							204.5	1.046	1.007	1.067
							204.9	1.046	1.007	1.067
							205.3	1.046	1.006	1.067
							205.7	1.046	1.006	1.068
							206.1	1.046	1.006	1.068
							206.5	1.047	1.006	1.068
							206.9	1.047	1.005	1.069
							207.3	1.047	1.005	1.069
							207.7	1.047	1.005	1.069
							208.1	1.047	1.004	1.069
							208.5	1.047	1.004	1.07
							208.9	1.047	1.004	1.07
							209.3	1.047	1.003	1.07
							209.7	1.047	1.003	1.07
							210.1	1.047	1.003	1.071
							210.5	1.047	1.003	1.071
							210.9	1.047	1.002	1.071
							211.3	1.047	1.002	1.071
							211.7	1.047	1.002	1.071
							212.1	1.047	1.001	1.071
							212.5	1.047	1.001	1.071
							212.9	1.047	1.001	1.072
							213.3	1.047	1.001	1.072
							213.7	1.047	1	1.072
							214.1	1.047	1	1.072
							214.5	1.047	1	1.072
							214.9	1.047	0.999	1.072
							215.3	1.046	0.999	1.072
							215.7	1.046	0.999	1.072
							216.1	1.046	0.999	1.072
							216.5	1.046	0.998	1.072
							216.9	1.046	0.998	1.072
							217.3	1.046	0.998	1.072
							217.7	1.046	0.998	1.071
							218.1	1.046	0.997	1.071
							218.5	1.045	0.997	1.071
							218.9	1.045	0.997	1.071
							219.3	1.045	0.997	1.071
							219.7	1.045	0.996	1.071
							220.1	1.045	0.996	1.071
							220.5	1.044	0.996	1.07
							220.9	1.044	0.996	1.07
							221.3	1.044	0.996	1.07
							221.7	1.044	0.995	1.07
							222.1	1.044	0.995	1.07
							222.5	1.043	0.995	1.069
							222.9	1.043	0.995	1.069
							223.3	1.043	0.994	1.069
							223.7	1.043	0.994	1.069
							224.1	1.042	0.994	1.068
							224.5	1.042	0.994	1.068
							224.9	1.042	0.994	1.068
							225.3	1.041	0.993	1.067
							225.7	1.041	0.993	1.067
							226.1	1.041	0.993	1.067
							226.5	1.041	0.993	1.066
							226.9	1.04	0.993	1.066
							227.3	1.04	0.992	1.065
							227.7	1.04	0.992	1.065
							228.1	1.039	0.992	1.065
							228.5	1.039	0.992	1.064
							228.9	1.039	0.992	1.064
							229.3	1.038	0.992	1.063
							229.7	1.038	0.991	1.063
							230.1	1.037	0.991	1.062
							230.5	1.037	0.991	1.062
							230.9	1.037	0.991	1.061
							231.3	1.036	0.991	1.061
							231.7	1.036	0.991	1.06
							232.1	1.036	0.99	1.06
							232.5	1.035	0.99	1.059
							232.9	1.035	0.99	1.059
							233.3	1.034	0.99	1.058
							233.7	1.034	0.99	1.057
							234.1	1.033	0.99	1.057
							234.5	1.033	0.99	1.056
							234.9	1.033	0.989	1.056
							235.3	1.032	0.989	1.055
							235.7	1.032	0.989	1.054
							236.1	1.031	0.989	1.054
							236.5	1.031	0.989	1.053
							236.9	1.03	0.989	1.053
							237.3	1.03	0.989	1.052
							237.7	1.03	0.989	1.051
							238.1	1.029	0.989	1.051
							238.5	1.029	0.988	1.05
							238.9	1.028	0.988	1.049
							239.3	1.028	0.988	1.049
							239.7	1.027	0.988	1.048
							240.1	1.027	0.988	1.047
							240.5	1.026	0.988	1.046
							240.9	1.026	0.988	1.046
							241.3	1.025	0.988	1.045
							241.7	1.025	0.988	1.044
							242.1	1.024	0.988	1.044
							242.5	1.024	0.988	1.043
							242.9	1.023	0.987	1.042
							243.3	1.023	0.987	1.041
							243.7	1.022	0.987	1.041
							244.1	1.022	0.987	1.04
							244.5	1.021	0.987	1.039
							244.9	1.021	0.987	1.038
							245.3	1.02	0.987	1.038
							245.7	1.02	0.987	1.037
							246.1	1.019	0.987	1.036
							246.5	1.019	0.987	1.035
							246.9	1.018	0.987	1.034
							247.3	1.018	0.987	1.034
							247.7	1.017	0.987	1.033
							248.1	1.017	0.987	1.032
							248.5	1.016	0.987	1.031
							248.9	1.015	0.987	1.03
							249.3	1.015	0.987	1.03
							249.7	1.014	0.987	1.029
							250.1	1.014	0.987	1.028
							250.5	1.013	0.987	1.027
							250.9	1.013	0.987	1.026
							251.3	1.012	0.987	1.026
							251.7	1.012	0.987	1.025
							252.1	1.011	0.987	1.024
							252.5	1.011	0.987	1.023
							252.9	1.01	0.987	1.022
							253.3	1.01	0.987	1.022
							253.7	1.009	0.987	1.021
							254.1	1.009	0.987	1.02
							254.5	1.008	0.987	1.019
							254.9	1.008	0.987	1.018
							255.3	1.007	0.987	1.018
							255.7	1.007	0.987	1.017
							256.1	1.006	0.987	1.016
							256.5	1.005	0.987	1.015
							256.9	1.005	0.987	1.014
							257.3	1.004	0.987	1.013
							257.7	1.004	0.987	1.013
							258.1	1.003	0.987	1.012
							258.5	1.003	0.987	1.011
							258.9	1.002	0.987	1.01
							259.3	1.002	0.987	1.009
							259.7	1.001	0.987	1.009
							260.1	1.001	0.987	1.008
							260.5	1	0.987	1.007
							260.9	1	0.987	1.006
							261.3	0.999	0.987	1.005
							261.7	0.999	0.987	1.005
							262.1	0.998	0.987	1.004
							262.5	0.998	0.987	1.003
							262.9	0.997	0.987	1.002
							263.3	0.997	0.987	1.002
							263.7	0.996	0.987	1.001
							264.1	0.996	0.988	1
							264.5	0.995	0.988	0.999
							264.9	0.995	0.988	0.998
							265.3	0.994	0.988	0.998
							265.7	0.994	0.988	0.997
							266.1	0.993	0.988	0.996
							266.5	0.993	0.988	0.995
							266.9	0.992	0.988	0.995
							267.3	0.992	0.988	0.994
							267.7	0.991	0.988	0.993
							268.1	0.991	0.988	0.992
							268.5	0.991	0.988	0.992
							268.9	0.99	0.988	0.991
							269.3	0.99	0.988	0.99
							269.7	0.989	0.989	0.99
							270.1	0.989	0.989	0.989
							270.5	0.988	0.989	0.988
							270.9	0.988	0.989	0.987
							271.3	0.987	0.989	0.987
							271.7	0.987	0.989	0.986
							272.1	0.987	0.989	0.985
							272.5	0.986	0.989	0.985
							272.9	0.986	0.989	0.984
							273.3	0.985	0.989	0.983
							273.7	0.985	0.99	0.983
							274.1	0.985	0.99	0.982
							274.5	0.984	0.99	0.981
							274.9	0.984	0.99	0.981
							275.3	0.983	0.99	0.98
							275.7	0.983	0.99	0.979
							276.1	0.983	0.99	0.979
							276.5	0.982	0.99	0.978
							276.9	0.982	0.99	0.978
							277.3	0.981	0.991	0.977
							277.7	0.981	0.991	0.976
							278.1	0.981	0.991	0.976
							278.5	0.98	0.991	0.975
							278.9	0.98	0.991	0.975
							279.3	0.98	0.991	0.974
							279.7	0.979	0.991	0.974
							280.1	0.979	0.991	0.973
							280.5	0.979	0.991	0.972
							280.9	0.978	0.992	0.972
							281.3	0.978	0.992	0.971
							281.7	0.978	0.992	0.971
							282.1	0.977	0.992	0.97
							282.5	0.977	0.992	0.97
							282.9	0.977	0.992	0.969
							283.3	0.977	0.992	0.969
							283.7	0.976	0.993	0.968
							284.1	0.976	0.993	0.968
							284.5	0.976	0.993	0.967
							284.9	0.975	0.993	0.967
							285.3	0.975	0.993	0.966
							285.7	0.975	0.993	0.966
							286.1	0.975	0.993	0.966
							286.5	0.974	0.993	0.965
							286.9	0.974	0.994	0.965
							287.3	0.974	0.994	0.964
							287.7	0.974	0.994	0.964
							288.1	0.973	0.994	0.963
							288.5	0.973	0.994	0.963
							288.9	0.973	0.994	0.963
							289.3	0.973	0.994	0.962
							289.7	0.973	0.995	0.962
							290.1	0.972	0.995	0.962
							290.5	0.972	0.995	0.961
							290.9	0.972	0.995	0.961
							291.3	0.972	0.995	0.961
							291.7	0.972	0.995	0.96
							292.1	0.971	0.995	0.96
							292.5	0.971	0.996	0.96
							292.9	0.971	0.996	0.959
							293.3	0.971	0.996	0.959
							293.7	0.971	0.996	0.959
							294.1	0.971	0.996	0.958
							294.5	0.971	0.996	0.958
							294.9	0.97	0.996	0.958
							295.3	0.97	0.996	0.958
							295.7	0.97	0.997	0.957
							296.1	0.97	0.997	0.957
							296.5	0.97	0.997	0.957
							296.9	0.97	0.997	0.957
							297.3	0.97	0.997	0.957
							297.7	0.97	0.997	0.956
							298.1	0.97	0.997	0.956
							298.5	0.97	0.998	0.956
							298.9	0.969	0.998	0.956
							299.3	0.969	0.998	0.956
							299.7	0.969	0.998	0.956
							300.1	0.969	0.998	0.955
							300.5	0.969	0.998	0.955
							300.9	0.969	0.998	0.955
							301.3	0.969	0.999	0.955
							301.7	0.969	0.999	0.955
							302.1	0.969	0.999	0.955
							302.5	0.969	0.999	0.955
							302.9	0.969	0.999	0.955
							303.3	0.969	0.999	0.955
							303.7	0.969	0.999	0.955
							304.1	0.969	1	0.954
							304.5	0.969	1	0.954
							304.9	0.969	1	0.954
							305.3	0.969	1	0.954
							305.7	0.969	1	0.954
							306.1	0.969	1	0.954
							306.5	0.969	1	0.954
							306.9	0.969	1	0.954
							307.3	0.969	1.001	0.954
							307.7	0.969	1.001	0.954
							308.1	0.969	1.001	0.954
							308.5	0.969	1.001	0.954
							308.9	0.969	1.001	0.954
							309.3	0.97	1.001	0.955
							309.7	0.97	1.001	0.955
							310.1	0.97	1.001	0.955
							310.5	0.97	1.002	0.955
							310.9	0.97	1.002	0.955
							311.3	0.97	1.002	0.955
							311.7	0.97	1.002	0.955
							312.1	0.97	1.002	0.955
							312.5	0.97	1.002	0.955
							312.9	0.97	1.002	0.955
							313.3	0.971	1.002	0.956
							313.7	0.971	1.002	0.956
							314.1	0.971	1.003	0.956
							314.5	0.971	1.003	0.956
							314.9	0.971	1.003	0.956
							315.3	0.971	1.003	0.956
							315.7	0.972	1.003	0.956
							316.1	0.972	1.003	0.957
							316.5	0.972	1.003	0.957
							316.9	0.972	1.003	0.957
							317.3	0.972	1.003	0.957
							317.7	0.972	1.004	0.958
							318.1	0.973	1.004	0.958
							318.5	0.973	1.004	0.958
							318.9	0.973	1.004	0.958
							319.3	0.973	1.004	0.958
							319.7	0.973	1.004	0.959
							320.1	0.974	1.004	0.959
							320.5	0.974	1.004	0.959
							320.9	0.974	1.004	0.96
							321.3	0.974	1.004	0.96
							321.7	0.974	1.005	0.96
							322.1	0.975	1.005	0.96
							322.5	0.975	1.005	0.961
							322.9	0.975	1.005	0.961
							323.3	0.975	1.005	0.961
							323.7	0.976	1.005	0.962
							324.1	0.976	1.005	0.962
							324.5	0.976	1.005	0.962
							324.9	0.976	1.005	0.963
							325.3	0.977	1.005	0.963
							325.7	0.977	1.005	0.963
							326.1	0.977	1.005	0.964
							326.5	0.978	1.005	0.964
							326.9	0.978	1.006	0.965
							327.3	0.978	1.006	0.965
							327.7	0.978	1.006	0.965
							328.1	0.979	1.006	0.966
							328.5	0.979	1.006	0.966
							328.9	0.979	1.006	0.967
							329.3	0.98	1.006	0.967
							329.7	0.98	1.006	0.967
							330.1	0.98	1.006	0.968
							330.5	0.981	1.006	0.968
							330.9	0.981	1.006	0.969
							331.3	0.981	1.006	0.969
							331.7	0.982	1.006	0.97
							332.1	0.982	1.006	0.97
							332.5	0.982	1.006	0.97
							332.9	0.982	1.006	0.971
							333.3	0.983	1.006	0.971
							333.7	0.983	1.007	0.972
							334.1	0.984	1.007	0.972
							334.5	0.984	1.007	0.973
							334.9	0.984	1.007	0.973
							335.3	0.985	1.007	0.974
							335.7	0.985	1.007	0.974
							336.1	0.985	1.007	0.975
							336.5	0.986	1.007	0.975
							336.9	0.986	1.007	0.976
							337.3	0.986	1.007	0.976
							337.7	0.987	1.007	0.977
							338.1	0.987	1.007	0.977
							338.5	0.987	1.007	0.978
							338.9	0.988	1.007	0.978
							339.3	0.988	1.007	0.979
							339.7	0.988	1.007	0.979
							340.1	0.989	1.007	0.98
							340.5	0.989	1.007	0.981
							340.9	0.99	1.007	0.981
							341.3	0.99	1.007	0.982
							341.7	0.99	1.007	0.982
							342.1	0.991	1.007	0.983
							342.5	0.991	1.007	0.983
							342.9	0.992	1.007	0.984
							343.3	0.992	1.007	0.984
							343.7	0.992	1.007	0.985
							344.1	0.993	1.007	0.986
							344.5	0.993	1.007	0.986
							344.9	0.993	1.007	0.987
							345.3	0.994	1.007	0.987
							345.7	0.994	1.007	0.988
							346.1	0.995	1.007	0.988
							346.5	0.995	1.007	0.989
							346.9	0.995	1.007	0.99
							347.3	0.996	1.007	0.99
							347.7	0.996	1.007	0.991
							348.1	0.997	1.007	0.991
							348.5	0.997	1.007	0.992
							348.9	0.997	1.007	0.992
							349.3	0.998	1.007	0.993
							349.7	0.998	1.007	0.994
							350.1	0.998	1.007	0.994
							350.5	0.999	1.007	0.995
							350.9	0.999	1.007	0.995
							351.3	1	1.007	0.996
							351.7	1	1.007	0.997
							352.1	1	1.007	0.997
							352.5	1.001	1.007	0.998
							352.9	1.001	1.007	0.998
							353.3	1.002	1.007	0.999
							353.7	1.002	1.007	0.999
							354.1	1.002	1.007	1
							354.5	1.003	1.007	1.001
							354.9	1.003	1.007	1.001
							355.3	1.003	1.007	1.002
							355.7	1.004	1.007	1.002
							356.1	1.004	1.007	1.003
							356.5	1.005	1.007	1.004
							356.9	1.005	1.007	1.004
							357.3	1.005	1.007	1.005
							357.7	1.006	1.007	1.005
							358.1	1.006	1.007	1.006
							358.5	1.006	1.007	1.006
							358.9	1.007	1.007	1.007
							359.3	1.007	1.007	1.008
							359.7	1.008	1.006	1.008
							360.1	1.008	1.006	1.009
							360.5	1.008	1.006	1.009
							360.9	1.009	1.006	1.01
							361.3	1.009	1.006	1.01
							361.7	1.009	1.006	1.011
							362.1	1.01	1.006	1.011
							362.5	1.01	1.006	1.012
							362.9	1.01	1.006	1.013
							363.3	1.011	1.006	1.013
							363.7	1.011	1.006	1.014
							364.1	1.011	1.006	1.014
							364.5	1.012	1.006	1.015
							364.9	1.012	1.006	1.015
							365.3	1.012	1.006	1.016
							365.7	1.013	1.006	1.016
							366.1	1.013	1.006	1.017
							366.5	1.013	1.006	1.017
							366.9	1.014	1.006	1.018
							367.3	1.014	1.005	1.018
							367.7	1.014	1.005	1.019
							368.1	1.015	1.005	1.019
							368.5	1.015	1.005	1.02
							368.9	1.015	1.005	1.02
							369.3	1.016	1.005	1.021
							369.7	1.016	1.005	1.021
							370.1	1.016	1.005	1.022
							370.5	1.016	1.005	1.022
							370.9	1.017	1.005	1.023
							371.3	1.017	1.005	1.023
							371.7	1.017	1.005	1.024
							372.1	1.018	1.005	1.024
							372.5	1.018	1.005	1.024
							372.9	1.018	1.005	1.025
							373.3	1.018	1.004	1.025
							373.7	1.019	1.004	1.026
							374.1	1.019	1.004	1.026
							374.5	1.019	1.004	1.027
							374.9	1.019	1.004	1.027
							375.3	1.02	1.004	1.027
							375.7	1.02	1.004	1.028
							376.1	1.02	1.004	1.028
							376.5	1.02	1.004	1.029
							376.9	1.02	1.004	1.029
							377.3	1.021	1.004	1.029
							377.7	1.021	1.004	1.03
							378.1	1.021	1.004	1.03
							378.5	1.021	1.004	1.03
							378.9	1.021	1.003	1.031
							379.3	1.022	1.003	1.031
							379.7	1.022	1.003	1.031
							380.1	1.022	1.003	1.032
							380.5	1.022	1.003	1.032
							380.9	1.022	1.003	1.032
							381.3	1.023	1.003	1.033
							381.7	1.023	1.003	1.033
							382.1	1.023	1.003	1.033
							382.5	1.023	1.003	1.034
							382.9	1.023	1.003	1.034
							383.3	1.023	1.003	1.034
							383.7	1.024	1.002	1.034
							384.1	1.024	1.002	1.035
							384.5	1.024	1.002	1.035
							384.9	1.024	1.002	1.035
							385.3	1.024	1.002	1.035
							385.7	1.024	1.002	1.036
							386.1	1.024	1.002	1.036
							386.5	1.024	1.002	1.036
							386.9	1.024	1.002	1.036
							387.3	1.025	1.002	1.036
							387.7	1.025	1.002	1.037
							388.1	1.025	1.002	1.037
							388.5	1.025	1.002	1.037
							388.9	1.025	1.001	1.037
							389.3	1.025	1.001	1.037
							389.7	1.025	1.001	1.037
							390.1	1.025	1.001	1.038
							390.5	1.025	1.001	1.038
							390.9	1.025	1.001	1.038
							391.3	1.025	1.001	1.038
							391.7	1.025	1.001	1.038
							392.1	1.025	1.001	1.038
							392.5	1.025	1.001	1.038
							392.9	1.025	1.001	1.038
							393.3	1.025	1.001	1.038
							393.7	1.025	1	1.038
							394.1	1.025	1	1.038
							394.5	1.025	1	1.039
							394.9	1.025	1	1.039
							395.3	1.025	1	1.039
							395.7	1.025	1	1.039
							396.1	1.025	1	1.039
							396.5	1.025	1	1.039
							396.9	1.025	1	1.039
							397.3	1.025	1	1.039
							397.7	1.025	1	1.039
							398.1	1.025	1	1.039
							398.5	1.025	1	1.039
							398.9	1.025	0.999	1.039
							399.3	1.025	0.999	1.039
							399.7	1.025	0.999	1.039
							400.1	1.025	0.999	1.038
							400.5	1.025	0.999	1.038
							400.9	1.025	0.999	1.038
							401.3	1.025	0.999	1.038
							401.7	1.025	0.999	1.038
							402.1	1.025	0.999	1.038
							402.5	1.025	0.999	1.038
							402.9	1.024	0.999	1.038
							403.3	1.024	0.999	1.038
							403.7	1.024	0.999	1.038
							404.1	1.024	0.999	1.037
							404.5	1.024	0.998	1.037
							404.9	1.024	0.998	1.037
							405.3	1.024	0.998	1.037
							405.7	1.024	0.998	1.037
							406.1	1.024	0.998	1.037
							406.5	1.023	0.998	1.036
							406.9	1.023	0.998	1.036
							407.3	1.023	0.998	1.036
							407.7	1.023	0.998	1.036
							408.1	1.023	0.998	1.036
							408.5	1.023	0.998	1.035
							408.9	1.022	0.998	1.035
							409.3	1.022	0.998	1.035
							409.7	1.022	0.998	1.035
							410.1	1.022	0.998	1.035
							410.5	1.022	0.998	1.034
							410.9	1.022	0.997	1.034
							411.3	1.021	0.997	1.034
							411.7	1.021	0.997	1.034
							412.1	1.021	0.997	1.033
							412.5	1.021	0.997	1.033
							412.9	1.021	0.997	1.033
							413.3	1.02	0.997	1.032
							413.7	1.02	0.997	1.032
							414.1	1.02	0.997	1.032
							414.5	1.02	0.997	1.032
							414.9	1.02	0.997	1.031
							415.3	1.019	0.997	1.031
							415.7	1.019	0.997	1.031
							416.1	1.019	0.997	1.03
							416.5	1.019	0.997	1.03
							416.9	1.018	0.997	1.03
							417.3	1.018	0.997	1.029
							417.7	1.018	0.997	1.029
							418.1	1.018	0.997	1.029
							418.5	1.017	0.997	1.028
							418.9	1.017	0.996	1.028
							419.3	1.017	0.996	1.027
							419.7	1.017	0.996	1.027
							420.1	1.016	0.996	1.027
							420.5	1.016	0.996	1.026
							420.9	1.016	0.996	1.026
							421.3	1.016	0.996	1.026
							421.7	1.015	0.996	1.025
							422.1	1.015	0.996	1.025
							422.5	1.015	0.996	1.024
							422.9	1.015	0.996	1.024
							423.3	1.014	0.996	1.024
							423.7	1.014	0.996	1.023
							424.1	1.014	0.996	1.023
							424.5	1.013	0.996	1.022
							424.9	1.013	0.996	1.022
							425.3	1.013	0.996	1.021
							425.7	1.013	0.996	1.021
							426.1	1.012	0.996	1.021
							426.5	1.012	0.996	1.02
							426.9	1.012	0.996	1.02
							427.3	1.011	0.996	1.019
							427.7	1.011	0.996	1.019
							428.1	1.011	0.996	1.018
							428.5	1.01	0.996	1.018
							428.9	1.01	0.996	1.017
							429.3	1.01	0.996	1.017
							429.7	1.01	0.996	1.017
							430.1	1.009	0.996	1.016
							430.5	1.009	0.996	1.016
							430.9	1.009	0.996	1.015
							431.3	1.008	0.996	1.015
							431.7	1.008	0.996	1.014
							432.1	1.008	0.996	1.014
							432.5	1.007	0.996	1.013
							432.9	1.007	0.996	1.013
							433.3	1.007	0.996	1.012
							433.7	1.006	0.996	1.012
							434.1	1.006	0.996	1.011
							434.5	1.006	0.996	1.011
							434.9	1.005	0.996	1.01
							435.3	1.005	0.996	1.01
							435.7	1.005	0.996	1.01
							436.1	1.005	0.996	1.009
							436.5	1.004	0.996	1.009
							436.9	1.004	0.996	1.008
							437.3	1.004	0.996	1.008
							437.7	1.003	0.996	1.007
							438.1	1.003	0.996	1.007
							438.5	1.003	0.996	1.006
							438.9	1.002	0.996	1.006
							439.3	1.002	0.996	1.005
							439.7	1.002	0.996	1.005
							440.1	1.001	0.996	1.004
							440.5	1.001	0.996	1.004
							440.9	1.001	0.996	1.003
							441.3	1	0.996	1.003
							441.7	1	0.996	1.002
							442.1	1	0.996	1.002
							442.5	0.999	0.996	1.001
							442.9	0.999	0.996	1.001
							443.3	0.999	0.996	1
							443.7	0.999	0.996	1
							444.1	0.998	0.996	1
							444.5	0.998	0.996	0.999
							444.9	0.998	0.996	0.999
							445.3	0.997	0.996	0.998
							445.7	0.997	0.996	0.998
							446.1	0.997	0.996	0.997
							446.5	0.996	0.996	0.997
							446.9	0.996	0.996	0.996
							447.3	0.996	0.996	0.996
							447.7	0.996	0.996	0.995
							448.1	0.995	0.996	0.995
							448.5	0.995	0.996	0.994
							448.9	0.995	0.996	0.994
							449.3	0.994	0.996	0.994
							449.7	0.994	0.996	0.993
							450.1	0.994	0.996	0.993
							450.5	0.994	0.996	0.992
							450.9	0.993	0.996	0.992
							451.3	0.993	0.996	0.991
							451.7	0.993	0.996	0.991
							452.1	0.992	0.996	0.991
							452.5	0.992	0.996	0.99
							452.9	0.992	0.996	0.99
							453.3	0.992	0.996	0.989
							453.7	0.991	0.996	0.989
							454.1	0.991	0.996	0.988
							454.5	0.991	0.996	0.988
							454.9	0.991	0.996	0.988
							455.3	0.99	0.996	0.987
							455.7	0.99	0.996	0.987
							456.1	0.99	0.996	0.986
							456.5	0.99	0.996	0.986
							456.9	0.989	0.996	0.986
							457.3	0.989	0.997	0.985
							457.7	0.989	0.997	0.985
							458.1	0.989	0.997	0.985
							458.5	0.988	0.997	0.984
							458.9	0.988	0.997	0.984
							459.3	0.988	0.997	0.983
							459.7	0.988	0.997	0.983
							460.1	0.987	0.997	0.983
							460.5	0.987	0.997	0.982
							460.9	0.987	0.997	0.982
							461.3	0.987	0.997	0.982
							461.7	0.987	0.997	0.981
							462.1	0.986	0.997	0.981
							462.5	0.986	0.997	0.981
							462.9	0.986	0.997	0.98
							463.3	0.986	0.997	0.98
							463.7	0.985	0.997	0.98
							464.1	0.985	0.997	0.979
							464.5	0.985	0.997	0.979
							464.9	0.985	0.997	0.979
							465.3	0.985	0.997	0.979
							465.7	0.985	0.997	0.978
							466.1	0.984	0.997	0.978
							466.5	0.984	0.997	0.978
							466.9	0.984	0.998	0.977
							467.3	0.984	0.998	0.977
							467.7	0.984	0.998	0.977
							468.1	0.984	0.998	0.977
							468.5	0.983	0.998	0.976
							468.9	0.983	0.998	0.976
							469.3	0.983	0.998	0.976
							469.7	0.983	0.998	0.976
							470.1	0.983	0.998	0.975
							470.5	0.983	0.998	0.975
							470.9	0.982	0.998	0.975
							471.3	0.982	0.998	0.975
							471.7	0.982	0.998	0.974
							472.1	0.982	0.998	0.974
							472.5	0.982	0.998	0.974
							472.9	0.982	0.998	0.974
							473.3	0.982	0.998	0.974
							473.7	0.982	0.998	0.973
							474.1	0.982	0.998	0.973
							474.5	0.981	0.998	0.973
							474.9	0.981	0.999	0.973
							475.3	0.981	0.999	0.973
							475.7	0.981	0.999	0.973
							476.1	0.981	0.999	0.972
							476.5	0.981	0.999	0.972
							476.9	0.981	0.999	0.972
							477.3	0.981	0.999	0.972
							477.7	0.981	0.999	0.972
							478.1	0.981	0.999	0.972
							478.5	0.981	0.999	0.972
							478.9	0.981	0.999	0.972
							479.3	0.98	0.999	0.971
							479.7	0.98	0.999	0.971
							480.1	0.98	0.999	0.971
							480.5	0.98	0.999	0.971
							480.9	0.98	0.999	0.971
							481.3	0.98	0.999	0.971
							481.7	0.98	0.999	0.971
							482.1	0.98	0.999	0.971
							482.5	0.98	1	0.971
							482.9	0.98	1	0.971
							483.3	0.98	1	0.971
							483.7	0.98	1	0.971
							484.1	0.98	1	0.971
							484.5	0.98	1	0.971
							484.9	0.98	1	0.97
							485.3	0.98	1	0.97
							485.7	0.98	1	0.97
							486.1	0.98	1	0.97
							486.5	0.98	1	0.97
							486.9	0.98	1	0.97
							487.3	0.98	1	0.97
							487.7	0.98	1	0.97
							488.1	0.98	1	0.97
							488.5	0.98	1	0.97
							488.9	0.98	1	0.97
							489.3	0.98	1	0.971
							489.7	0.98	1	0.971
							490.1	0.98	1	0.971
							490.5	0.98	1.001	0.971
							490.9	0.98	1.001	0.971
							491.3	0.981	1.001	0.971
							491.7	0.981	1.001	0.971
							492.1	0.981	1.001	0.971
							492.5	0.981	1.001	0.971
							492.9	0.981	1.001	0.971
							493.3	0.981	1.001	0.971
							493.7	0.981	1.001	0.971
							494.1	0.981	1.001	0.971
							494.5	0.981	1.001	0.971
							494.9	0.981	1.001	0.972
							495.3	0.981	1.001	0.972
							495.7	0.981	1.001	0.972
							496.1	0.981	1.001	0.972
							496.5	0.982	1.001	0.972
							496.9	0.982	1.001	0.972
							497.3	0.982	1.001	0.972
							497.7	0.982	1.001	0.972
							498.1	0.982	1.001	0.973
							498.5	0.982	1.001	0.973
							498.9	0.982	1.001	0.973
							499.3	0.982	1.002	0.973
							499.7	0.983	1.002	0.973
